# Supplementary material for: Target discovery of acivicin in cancer cells elucidates its mechanism of growth inhibition
Source: Chem Sci. 2014 Sep 16;6(1):237–45. doi: 10.1039/c4sc02339k (PMC4285139; doi:10.1039/c4sc02339k)
Supplement: Supplementary file 1 [file SC-006-C4SC02339K-s001.xlsx]

## Sheet: ACVL2a -> ACAA2
		Area				Control (1)			Control (2)			ACVL2a (1)			ACVL2a (2)			General information
Accession	Description	Control (1)	Control (2)	ACVL2a (1)	ACVL2a (2)	Score A2	# Peptides A2	# PSM A2	Score B2	# Peptides B2	# PSM B2	Score C2	# Peptides C2	# PSM C2	Score D2	# Peptides D2	# PSM D2	# AAs	MW [kDa]	ΣCoverage
IPI00130950.1	Betaine--homocysteine S-methyltransferase 1	7.20997e+08	3.00887e+09	4.03624e+08	4.46181e+09	100.002	13	28	138.714	12	40	46.8673	9	14	142.645	11	41	407	44.9919	57
IPI00226430.2	3-ketoacyl-CoA thiolase, mitochondrial	0	1.96456e+08	5.74083e+08	8.40779e+08				34.6181	7	10	133.119	15	38	67.6436	9	21	397	41.8315	56.42
IPI00110850.1	Actin, cytoplasmic 1	0	2312127064	1.01054e+09	2.3882e+09				98.9559	10	31	82.7221	12	29	116.962	7	40	375	41.7097	54.13
IPI00134746.5	Argininosuccinate synthase	3.89298e+07	9.94126e+08	1.3661e+09	1.06715e+09	9.31723	3	4	73.4384	11	23	127.805	18	43	51.1621	9	17	412	46.555	52.18
IPI00129178.1	Ornithine aminotransferase, mitochondrial	0	7.8246e+08	6.99598e+07	8.97186e+08				82.8882	14	26	16.4319	5	5	68.1103	10	22	439	48.3239	51.48
IPI00230440.6	Adenosylhomocysteinase	2.52798e+07	2.3728e+08	7.90083e+08	3.23484e+08	16.8796	3	5	27.5203	7	9	117.443	21	39	25.3464	5	9	432	47.6573	50.46
IPI00762452.2	isocitrate dehydrogenase 1 (NADP+), soluble	36897692	2.90165e+08	2.64627e+08	2.54843e+08				21.5047	7	7	43.9291	13	15	19.7303	5	6	414	46.6445	40.1
IPI00117043.1	Actin, aortic smooth muscle	0	9.87551e+08	7.15092e+08	1.06173e+09				48.4228	8	17	41.3119	7	16	13.885	2	5	377	41.9818	38.46
IPI00387282.4	Arylacetamide deacetylase	4.6775e+07	1.13974e+09	0	1.17554e+09	11.2538	3	3	58.488	9	16				51.7809	8	15	398	45.2213	37.94
IPI00138084.2	Isoform Short of Adenosine kinase	1.90404e+07	1.73662e+08	1.79797e+08	2.22712e+08	14.8021	4	4	28.2179	8	10	38.7947	9	13	26.9044	8	10	345	38.4275	35.65
IPI00409360.3	Putative uncharacterized protein	5.16467e+08	0	0	0	75.8761	12	22										661	74.6702	27.23
IPI00460132.1	Isoform 2 of Elongation factor Tu, mitochondrial	0	3.58292e+07	1.6021e+07	5.12088e+07				10.4985	4	4	14.5932	4	5	5.13457	2	2	435	47.1926	25.52
IPI00128023.3	NADH dehydrogenase [ubiquinone] iron-sulfur protein 2, mitochondrial	0	1.89827e+08	1.36319e+07	2.41262e+08				27.1885	8	10				17.3565	6	7	463	52.5917	25.49
IPI00420718.4	Hydroxymethylglutaryl-CoA synthase, mitochondrial	5.38491e+08	6.27096e+07	8.8375e+07	9.45073e+07	79.3158	10	26	8.01364	2	3	13.0119	4	5				508	56.7865	25.2
IPI00114710.3	Pyruvate carboxylase, mitochondrial	3.51012e+08	1.9279e+08	1.18546e+08	233514458	85.3839	15	27	31.2145	7	10	23.2926	7	8	19.5935	5	7	1178	129.602	23.51
IPI00321587.5	Keratin, type I cuticular Ha3-I	0	8.66399e+07	0	1.8753e+08				5.59745	2	2				24.8009	6	8	404	46.1073	23.27
IPI00759847.1	Isoform 2 of Protein NDRG2	0	1.17426e+08	0	1.51171e+08				17.3813	5	6				7.21858	2	3	357	39.2554	23.25
IPI00221528.1	Beta-actin-like protein 2	0	1.78381e+09	7.19827e+08	1.7115e+09				39.0795	3	11	39.1135	5	13	77.6623	3	27	376	41.977	21.81
IPI00114330.3	Homogentisate 1,2-dioxygenase	2.36268e+08	2.40315e+07	0	0	64.4183	9	21	5.83189	2	2							445	49.9576	20.45
IPI00108478.1	Keratin, type I cuticular Ha4	0	8.66399e+07	0	1.8753e+08				5.59745	2	2				21.8751	5	7	392	44.5313	20.41
IPI00318614.9	Isocitrate dehydrogenase [NADP], mitochondrial	2.07836e+07	1.4248e+08	1.40225e+08	0	5.3262	2	2	20.6148	5	7	22.1238	7	8				452	50.8739	19.91
IPI00114818.1	SEC14-like protein 2	3.1987e+07	7.9057e+07	6.41485e+07	1.44103e+08	4.58524	2	2	14.4051	3	4	13.8019	5	5	16.9175	4	6	403	46.2706	19.11
IPI00454201.2	Isoform 2 of Kynurenine--oxoglutarate transaminase 3	1.94915e+07	7.8444e+07	4.80403e+07	1.17981e+08	9.11856	3	3	10.5718	3	3	10.0993	2	3	6.54046	2	2	420	47.2901	16.9
IPI00115607.3	Trifunctional enzyme subunit beta, mitochondrial	7.22928e+07	2.06694e+07	0	5.21573e+07	22.0712	5	8	5.75176	2	2				8.48464	3	3	475	51.3534	16.42
IPI00323908.1	Cytochrome P450 2D10	1.17187e+08	0	0	1.01075e+07	24.4214	7	8										504	57.1965	15.28
IPI00831534.1	51 kDa protein	9.40565e+07	0	0	0	21.815	6	8										441	50.9372	14.51
IPI00416577.1	Isoform 2 of Rab GDP dissociation inhibitor beta	3.93573e+07	0	0	0	35.3891	5	10										409	46.6279	14.43
IPI00927993.1	49 kDa protein	5.2847e+07	0	0	0	28.0645	7	10										438	48.8109	14.38
IPI00118676.3	Eukaryotic initiation factor 4A-I	5.51975e+07	5.11807e+07	3.0756e+07	8.64707e+07	28.7125	5	9	9.18207	3	3				5.10007	2	2	406	46.1246	14.29
IPI00742309.1	Isoform 2 of Kynurenine 3-monooxygenase	4.55373e+07	3.89017e+07	0	5.84073e+07	15.8757	4	5	6.13704	2	2							445	50.3626	13.03
IPI00111855.7	3 beta-hydroxysteroid dehydrogenase/Delta 5-->4-isomerase type 3	0	6.21474e+07	24375780	5.48671e+07				12.4088	4	5	6.26502	2	2	10.4384	3	4	373	42.0047	12.87
IPI00626790.3	Glutamine synthetase	0	0	6.07678e+07	7.21695e+07							18.0228	3	5				373	42.0923	12.06
IPI00114209.1	Glutamate dehydrogenase 1, mitochondrial	2.32354e+07	5.49001e+07	0	4.15665e+07	8.98382	2	3	7.63433	3	3							558	61.2982	11.83
IPI00307837.6	Elongation factor 1-alpha 1	2.74436e+07	0	4.80433e+07	0	9.54133	2	3				7.53997	3	3				462	50.0821	11.69
IPI00554931.3	4-hydroxyphenylpyruvate dioxygenase	0	0	4.27996e+07	0							10.5702	3	4				393	45.0259	10.69
IPI00111885.1	Cytochrome b-c1 complex subunit 1, mitochondrial	6.34845e+07	5.27458e+07	0	6.75851e+07	25.1275	4	8										480	52.7354	10.42
IPI00858306.1	31 kDa protein	0	9.14657e+07	0	9.04357e+07				5.7835	2	2							275	30.6875	10.18
IPI00261627.1	Succinyl-CoA ligase [ADP-forming] subunit beta, mitochondrial	0	0	3.54206e+07	0							10.2593	3	3				463	50.0821	10.15
IPI00111908.8	Carbamoyl-phosphate synthase [ammonia], mitochondrial	9.79681e+07	6.45825e+07	3.97667e+07	5.62008e+07	52.4432	12	16	15.5843	5	5	10.5447	3	4	11.5203	3	3	1500	164.514	9.8
IPI00130391.1	protease, serine, 1	4.79537e+09	4.57956e+09	3.27486e+09	5.21125e+09				27.7959	2	8	33.5273	2	11	26.3249	2	8	246	26.1178	9.76
IPI00755181.1	keratin complex 1, acidic, gene 10	3.26022e+07	9.0823e+07	6.25096e+07	3.46602e+08	17.0959	3	6	4.97505	2	2	14.245	3	5	15.8526	4	6	561	57.0067	9.63
IPI00125514.1	Ectonucleoside triphosphate diphosphohydrolase 5	0	9.86593e+06	0	1.62486e+07										7.46548	2	2	427	47.0717	9.6
IPI00751485.1	similar to ribosomal protein L3 isoform 3	0	7.15222e+07	0	4.45375e+07				7.37727	2	3				5.25603	2	2	354	40.1146	9.6
IPI00119470.1	Probable imidazolonepropionase	0	1.03725e+08	7.14406e+07	0							11.7192	3	4				426	46.4586	8.45
IPI00312058.5	Catalase	2.88447e+07	0	0	0	18.7446	3	5										527	59.7276	8.35
IPI00153190.1	SEC14-like protein 4	5.25911e+07	2.54613e+07	2.08182e+07	3.66997e+07							7.65712	3	3				403	46.0235	7.69
IPI00318841.4	Elongation factor 1-gamma	8.91491e+07	0	0	0	8.21278	3	3										437	50.0292	7.09
IPI00129928.2	Isoform Mitochondrial of Fumarate hydratase, mitochondrial	2.13664e+07	0	1.4875e+07	8.09816e+07	10.8322	2	3										507	54.3361	6.71
IPI00221400.5	Alcohol dehydrogenase 1	0	0	2.45622e+07	0							6.25883	2	2				375	39.7456	6.67
IPI00227140.1	Keratin, type I cytoskeletal 14	3.04884e+07	5.79415e+07	4.49914e+07	6.33989e+07	8.67387	2	3	6.91544	2	2	6.56972	2	2	7.9888	2	3	484	52.8339	6.4
IPI00267489.1	Putative uncharacterized protein	4.66649e+07	0	0	0	9.20133	2	3										440	50.4455	5.91
IPI00270326.1	Putative uncharacterized protein	1.69399e+07	0	0	0	14.1989	2	4										475	52.8332	5.26
IPI00409412.3	Putative uncharacterized protein	1.70378e+07	3.47996e+07	2.38408e+07	4.31601e+07				9.42519	2	3							491	56.1084	4.89
IPI00762806.4	Isoform 1 of Tetratricopeptide repeat protein 38	2.93385e+07	0	0	0	6.23757	2	2										465	52.1903	4.3
IPI00124499.2	Keratin, type II cytoskeletal 79	0	6.0407e+07	4.42364e+07	1.39083e+08							8.91625	2	3				531	57.5168	4.14
IPI00626662.3	Retinal dehydrogenase 1	0	0	3.48292e+07	0							5.24974	2	2				501	54.4328	3.99
IPI00470126.4	60 kDa protein	1.1562e+07	7.45602e+07	7.05834e+07	4.073e+08							12.1324	2	4				563	60.3249	3.91
IPI00131695.3	Serum albumin	0	0	2.17786e+07	0							5.90641	2	2				608	68.6477	3.78
IPI00625729.2	Keratin, type II cytoskeletal 1	3.11273e+07	1.2598e+08	1.44272e+08	4.48807e+08				6.24594	2	2	6.05216	2	2	10.5152	2	4	637	65.5653	3.61
IPI00111218.1	Aldehyde dehydrogenase, mitochondrial	1.92665e+07	0	0	9.18748e+07	4.80406	2	2										519	56.5018	2.89

## Sheet: ACVL2b -> ALDH1A7, ALDH2
		Area				Control (1)			Control (2)			ACVL2b (1)			ACVL2b (2)			General information
Accession	Description	Control (1)	Control (2)	ACVL2b (1)	ACVL2b (2)	Score A2	# Peptides A2	# PSM A2	Score B2	# Peptides B2	# PSM B2	Score C2	# Peptides C2	# PSM C2	Score D2	# Peptides D2	# PSM D2	# AAs	MW [kDa]	ΣCoverage
IPI00626662.3	Retinal dehydrogenase 1	7.57126e+07	223853889	1.42316e+09	6.19948e+08	21.4601	2	6	33.5764	8	11	91.5996	18	29	83.4505	18	28	501	54.4328	58.28
IPI00623845.3	Selenium-binding protein 1	8.26862e+07	2.74721e+08	1.13789e+09	2.07205e+08	32.1261	3	9	39.6945	7	14	94.5499	16	32	31.1215	7	11	472	52.4804	56.99
IPI00111218.1	Aldehyde dehydrogenase, mitochondrial	3.16447e+07	1.02915e+08	2.66675e+09	5.65914e+09	11.701	2	4	10.6948	4	4	117.516	14	39	182.06	20	59	519	56.5018	52.41
IPI00126508.1	Dimethylaniline monooxygenase [N-oxide-forming] 3	0	1.01654e+09	1.43029e+08	6.74105e+08				93.3204	15	32	17.8397	5	6	58.342	16	22	534	60.4767	42.51
IPI00454008.1	Serine hydroxymethyltransferase	3.38614e+07	6.38344e+08	5.54501e+08	4.42552e+08				46.2841	12	16	33.1321	7	13	49.5121	13	17	504	55.7256	41.87
IPI00336362.2	Aldehyde dehydrogenase, cytosolic 1	7.57126e+07	6.71489e+07	9.48771e+08	3.33439e+08	21.4974	2	6	7.00859	2	2	44.3625	11	15	31.34	8	11	501	54.553	39.72
IPI00134691.3	UDP-glucuronosyltransferase 1-1	0	1.43101e+09	1.8614e+08	9.93658e+08				102.26	13	32	10.3167	3	4	96.8925	11	31	535	60.084	38.69
IPI00130280.1	ATP synthase subunit alpha, mitochondrial	7.52268e+06	184965921	2.39766e+08	3.29872e+08	9.76594	3	3	11.0349	4	4	16.0464	4	6	51.1034	14	17	553	59.7156	37.07
IPI00116432.1	Dimethylaniline monooxygenase [N-oxide-forming] 1	0	5.6073e+08	1.40671e+08	4.2237e+08				23.9801	7	10	15.3513	6	6	47.6597	11	18	532	59.876	35.15
IPI00890092.1	Alpha-aminoadipic semialdehyde dehydrogenase	0	3.83099e+08	3.3167e+08	2.09092e+08				34.6939	9	11	31.5042	9	11	18.1867	4	6	511	55.6096	33.86
IPI00312058.5	Catalase	2.3541e+07	1.69763e+08	2.55831e+08	1.05363e+08				34.0651	9	12	39.2068	12	14	19.1718	6	7	527	59.7276	33.78
IPI00114209.1	Glutamate dehydrogenase 1, mitochondrial	9.72777e+06	1.44565e+08	5.80539e+08	2.20316e+08				13.2734	5	5	55.0453	14	20	22.5077	7	9	558	61.2982	33.51
IPI00405303.1	Putative uncharacterized protein	9.14831e+06	3.32462e+08	1.50039e+08	3.36163e+08				32.2953	6	12	22.1299	6	8	38.1318	8	14	426	47.6519	26.53
IPI00403810.2	Tubulin alpha-1C chain	3.88452e+07	6.74165e+07	1.72111e+08	8.2909e+07	10.1094	2	3	5.54328	2	2	21.54	6	8	15.8455	4	5	449	49.8775	25.17
IPI00128287.1	Cytochrome P450 1A2	8.15906e+06	3.59323e+08	0	3.36571e+08	7.58194	2	2	51.0294	10	17				24.6671	8	9	513	58.1471	25.15
IPI00153143.1	UDP glucuronosyltransferase 2 family, polypeptide B1	0	3.26771e+08	8.27446e+07	4.46666e+08				22.1712	6	9				25.6736	9	10	529	60.118	23.82
IPI00117350.1	Tubulin alpha-4A chain	2.42472e+07	80619457	1.5433e+08	5.85131e+07	12.1459	2	4				19.3662	5	7	12.2812	3	4	448	49.8924	22.99
IPI00113073.3	Aldehyde dehydrogenase X, mitochondrial	4.02237e+07	2.10707e+08	3.14755e+08	2.92517e+08				27.0529	8	10	16.6107	4	5	22.5809	7	9	519	57.5165	21.77
IPI00458204.8	similar to Tubulin, beta 4	1.62247e+07	0	1.46366e+08	2.93921e+07	8.38808	2	3				19.5735	6	8				444	49.7539	21.4
IPI00279474.1	Isoform 2 of UTP--glucose-1-phosphate uridylyltransferase	3.99486e+07	1.7644e+08	5.31054e+08	1.11999e+08				17.386	6	6	49.089	9	17	13.4221	4	4	497	55.6811	21.33
IPI00417180.3	UDP glycosyltransferase 1 family, polypeptide A10	0	8.94618e+08	2.04793e+08	3.06031e+08				50.5254	5	16	7.32594	2	3	52.3904	5	16	530	60.2557	18.87
IPI00785460.2	UDP-glucuronosyltransferase 1-9	0	8.94618e+08	2.04793e+08	3.06031e+08				50.5254	5	16	7.32594	2	3	50.6466	5	16	528	59.9687	17.42
IPI00831055.2	Beta-globin	0	0	7.72968e+07	0							5.47413	2	2				147	15.7111	17.01
IPI00471231.2	UDP-glucuronosyltransferase 2A3	0	3.48501e+08	0	2.17597e+08				8.5752	4	4				46.3516	5	16	534	61.0793	16.67
IPI00109257.1	Leukotriene-B4 omega-hydroxylase 3	0	1.28741e+08	0	9.07132e+07				19.1072	5	7				18.5334	5	6	524	59.7619	15.46
IPI00110556.1	Cytochrome P450 2E1	4.3119e+07	1.05768e+08	1.38259e+08	2.20358e+08							4.3451	2	2	12.7659	5	5	493	56.7686	15.21
IPI00461964.3	Methylmalonate-semialdehyde dehydrogenase [acylating], mitochondrial	0	1.31045e+08	6.11588e+07	5.83155e+07				24.1895	5	8				11.456	3	4	535	57.8785	15.14
IPI00129011.1	Formimidoyltransferase-cyclodeaminase	9.84973e+06	0	8.66299e+07	1.80378e+07							16.1026	6	6				541	58.9015	13.31
IPI00458711.2	Lanosterol 14-alpha demethylase	0	7.94222e+07	0	4.47153e+07				9.45958	3	3				8.98023	3	3	503	56.7394	11.53
IPI00462507.1	MFLJ00064 protein (Fragment)	6.15765e+06	0	3.6133e+07	0	7.383	2	2				5.879	2	2				401	44.3493	11.47
IPI00318577.1	Dihydropyrimidinase	0	1.05071e+08	1.90605e+08	9.46025e+07				14.5311	4	6	13.1893	4	5				519	56.6886	11.37
IPI00319525.3	Glycogen phosphorylase, liver form	0	1.25401e+08	0	1.53992e+08				16.1498	5	6				14.0351	5	5	850	97.369	11.29
IPI00468653.4	Putative uncharacterized protein	0	0	7.27887e+07	0							14.3146	4	5				505	55.0322	11.09
IPI00875581.1	UDP-glucuronosyltransferase 2B5	0	2.1986e+08	8.27446e+07	2.60241e+08				14.7001	4	5				10.55	3	4	530	60.8161	10.57
IPI00130391.1	protease, serine, 1	0	3.49959e+09	2.66461e+09	4.26689e+09				30.1547	2	9	18.3226	2	6	28.0903	2	9	246	26.1178	9.76
IPI00119622.1	Cysteine sulfinic acid decarboxylase	0	0	1.43446e+08	0							22.7647	5	8				493	55.1094	9.74
IPI00460063.2	Prenylcysteine oxidase	0	9.17089e+07	0	4.39049e+07				9.66444	2	3				4.93008	2	2	505	56.4587	9.7
IPI00755181.1	keratin complex 1, acidic, gene 10	0	2.49143e+08	2.4727e+08	4.06211e+08				16.2561	4	6	17.5445	5	7	16.0611	5	6	561	57.0067	9.63
IPI00221608.3	Sorting and assembly machinery component 50 homolog	0	9.09358e+07	0	8.11145e+07				12.4424	4	5							469	51.8313	9.59
IPI00169666.3	UDP glucuronosyltransferase 2 family, polypeptide B34	0	1.93788e+08	0	1.73153e+08				7.29655	3	3				32.1679	3	12	532	60.8374	9.21
IPI00465739.2	MCG7659, isoform CRA_b	0	1.12431e+08	0	9.76613e+07				12.9584	4	5				5.14024	2	2	491	55.835	8.96
IPI00652521.1	Putative uncharacterized protein	0	0	1.28431e+08	0							13.801	3	5				494	54.8184	8.7
IPI00119940.1	Steroid 17-alpha-hydroxylase/17,20 lyase	0	4.80248e+07	0	5.79838e+07				9.94173	3	4				7.56535	2	3	507	57.6012	8.68
IPI00119685.1	Sterol 26-hydroxylase, mitochondrial	0	9.18423e+07	1.05891e+08	7.87188e+07							10.7633	2	4	10.9789	3	4	533	60.6819	8.63
IPI00111908.8	Carbamoyl-phosphate synthase [ammonia], mitochondrial	1.28019e+07	8.41976e+07	8.55906e+07	5.38161e+07	15.1216	4	4	5.93109	2	2	14.5832	5	6	13.6445	3	4	1500	164.514	7.6
IPI00470126.4	60 kDa protein	2.88946e+07	0	3.54098e+07	1.07403e+08							9.3044	2	3	20.6053	4	8	563	60.3249	7.28
IPI00130950.1	Betaine--homocysteine S-methyltransferase 1	4.65217e+06	0	6.61812e+07	1.19461e+07							6.47596	2	2				407	44.9919	6.39
IPI00828587.1	Isoform 2 of Lipase maturation factor 1	0	4.56364e+07	0	3.84538e+07				15.1318	2	5				6.80461	2	2	567	65.0371	6.35
IPI00127206.6	Fructose-bisphosphate aldolase B	0	0	7.83218e+07	0							7.73631	2	3				364	39.4821	6.04
IPI00133877.1	Cytochrome P450 4A14	0	2.43412e+07	3.88214e+06	1.67549e+07				14.6504	2	5							507	58.6821	5.72
IPI00828469.1	Isoform 2 of Cytosol aminopeptidase	0	2.11406e+07	4.99731e+07	0							5.44203	2	2				488	52.7168	5.33
IPI00409412.3	Putative uncharacterized protein	0	4.29965e+07	3.11569e+07	2.49777e+07										5.30284	2	2	491	56.1084	4.89
IPI00124499.2	Keratin, type II cytoskeletal 79	1.40993e+07	0	1.07987e+07	1.24982e+08										14.0101	2	5	531	57.5168	4.14
IPI00625729.2	Keratin, type II cytoskeletal 1	0	2.84747e+08	1.76824e+08	1.97073e+08				6.3642	2	2	11.2692	3	4	5.98957	2	2	637	65.5653	3.77
IPI00124372.3	aldehyde dehydrogenase 9A1	0	0	8.48448e+07	2.76482e+07							4.72897	2	2				518	55.8514	3.67
IPI00153317.3	10-formyltetrahydrofolate dehydrogenase	0	0	2.62895e+07	4.60279e+08							14.8358	3	5				902	98.6465	2.99
IPI00114710.3	Pyruvate carboxylase, mitochondrial	0	3.5392e+07	7.37341e+07	2.77741e+07							8.03503	3	3				1178	129.602	2.8

## Sheet: ACVL2b -> ALDH1A1
		Area				Control (1)			Control (2)			ACVL2b (1)			ACVL2b (2)			General information
Accession	Description	Control (1)	Control (2)	ACVL2b (1)	ACVL2b (2)	Score A2	# Peptides A2	# PSM A2	Score B2	# Peptides B2	# PSM B2	Score C2	# Peptides C2	# PSM C2	Score D2	# Peptides D2	# PSM D2	# AAs	MW [kDa]	ΣCoverage
IPI00312058.5	Catalase	2.74946e+09	5.30579e+08	8.12724e+08	1.60247e+09	196.404	22	63	56.4769	5	16	98.3262	17	34	196.7	24	64	527	59.7276	60.53
IPI00626662.3	Retinal dehydrogenase 1	0	0	1.40918e+09	5.29038e+07							120.28	20	38	5.7382	2	2	501	54.4328	56.09
IPI00321617.1	Isoform 1 of Epoxide hydrolase 2	8.83274e+07	4.40313e+07	0	5.24018e+08	10.8053	3	4	19.1324	5	5				97.3385	16	33	554	62.4746	55.42
IPI00831055.2	Beta-globin	0	0	0	8.78167e+07										20.509	6	7	147	15.7111	51.7
IPI00553333.2	Hemoglobin subunit beta-1	0	0	0	8.32968e+07										18.0052	5	6	147	15.8301	45.58
IPI00461964.3	Methylmalonate-semialdehyde dehydrogenase [acylating], mitochondrial	6.78551e+08	0	7.66413e+08	0	71.2327	13	22				89.7546	16	31				535	57.8785	43.18
IPI00122815.3	Putative uncharacterized protein	3.24661e+08	0	3.6401e+08	1.82055e+07	69.1271	14	21				74.8381	16	24				509	57.0228	43.03
IPI00226140.5	Amine oxidase [flavin-containing] B	8.12855e+08	6.00795e+07	8.55923e+07	2.21556e+08	61.6112	10	20				22.5948	6	9	32.2166	9	12	520	58.5063	39.62
IPI00308885.6	Isoform 1 of 60 kDa heat shock protein, mitochondrial	7.47022e+07	5.38404e+07	0	4.54177e+08	20.2419	5	7							68.1412	12	20	573	60.9174	39.27
IPI00230108.6	Protein disulfide-isomerase A3	3.44957e+08	2.38337e+07	9.84151e+07	5.17865e+07	49.5016	13	18				21.3363	7	8	8.50942	4	4	505	56.6427	37.82
IPI00606510.1	Propionyl-CoA carboxylase beta chain, mitochondrial	3.1892e+08	0	2.66515e+08	0	47.1008	13	15				52.2793	14	17				541	58.3569	36.41
IPI00115867.4	Liver carboxylesterase 1	3.3153e+08	4.13955e+07	0	6.49058e+08	28.0464	7	10	16.3804	4	5				61.3671	12	22	565	62.64	34.51
IPI00352124.2	flavin containing monooxygenase 5	7.78999e+08	0	0	2.35609e+08	58.4133	15	20							29.3922	10	11	533	59.962	33.02
IPI00128399.3	Putative uncharacterized protein	1.34733e+08	1.65997e+07	0	3.40724e+08	9.61382	3	3	7.64953	2	2				43.6567	9	14	561	61.5732	31.91
IPI00890092.1	Alpha-aminoadipic semialdehyde dehydrogenase	185653901	0	2.61927e+08	0	13.5387	3	4				36.0084	10	12				511	55.6096	30.92
IPI00874456.1	Dihydrolipoyl dehydrogenase, mitochondrial	2.01463e+08	0	2.07587e+08	0	33.2716	9	11				38.629	9	12				509	54.2382	29.86
IPI00126508.1	Dimethylaniline monooxygenase [N-oxide-forming] 3	2.63961e+08	0	3.5371e+08	0	44.9422	12	16				44.5086	12	16				534	60.4767	29.03
IPI00316314.1	2-hydroxyacyl-CoA lyase 1	5.11746e+07	4.29732e+07	0	3.70358e+08	7.62225	2	3							50.2338	12	17	581	63.6189	28.23
IPI00111908.8	Carbamoyl-phosphate synthase [ammonia], mitochondrial	3.08949e+08	69381985	1.65697e+08	2.42216e+08	78.3784	19	26	25.7131	6	7	36.2373	10	11	95.0091	25	33	1500	164.514	26.6
IPI00267407.1	Aldehyde dehydrogenase family 8 member A1	1.72489e+08	4.1325e+07	1.55269e+08	6.91268e+07	39.7506	8	11	7.45076	2	2	31.4497	7	10	13.4706	3	4	487	53.6295	26.49
IPI00471231.2	UDP-glucuronosyltransferase 2A3	6.05719e+08	0	4.57544e+08	1.25247e+07	19.7468	6	8				44.0355	8	15				534	61.0793	26.03
IPI00129011.1	Formimidoyltransferase-cyclodeaminase	1.49865e+08	0	1.65486e+08	0	37.8725	9	13				33.2444	9	11				541	58.9015	25.14
IPI00318577.1	Dihydropyrimidinase	9.59219e+07	0	1.43944e+08	0	24.5641	5	7				33.1027	8	10				519	56.6886	23.31
IPI00153144.3	Sulfite oxidase, mitochondrial	8.41888e+07	0	0	1.35687e+08	7.9903	2	2							35.0064	7	10	546	60.7178	21.61
IPI00928176.1	aldehyde dehydrogenase 4A1 precursor	1.01861e+07	0	0	1.25814e+08										31.905	8	10	562	61.8015	20.82
IPI00828822.2	Isoform 2 of Liver carboxylesterase 31	0	0	0	1.37136e+08										28.7774	8	11	524	57.8215	20.8
IPI00134691.3	UDP-glucuronosyltransferase 1-1	1.30498e+08	0	1.61689e+08	0	19.362	4	5				35.2566	6	12				535	60.084	19.07
IPI00856823.1	Protein	0	0	3.28838e+07	0							6.13825	2	2				197	22.2901	17.77
IPI00775829.1	pyruvate kinase, liver and RBC isoform 2	0	0	0	1.36479e+08										20.7596	6	7	543	58.7838	17.31
IPI00169666.3	UDP glucuronosyltransferase 2 family, polypeptide B34	2.83334e+08	0	3.8358e+08	0	24.1685	4	8				42.1488	6	15				532	60.8374	17.11
IPI00828469.1	Isoform 2 of Cytosol aminopeptidase	8.29984e+07	0	1.07024e+08	1.47473e+07	14.5345	5	6				15.1672	4	6				488	52.7168	15.16
IPI00120197.1	Cytochrome P450 4V3	1.8955e+07	0	3.70833e+07	0	6.89942	2	2				18.7326	4	6				525	60.8995	13.71
IPI00553717.6	Methylcrotonoyl-CoA carboxylase beta chain, mitochondrial	6.50104e+07	4.79288e+07	0	6.91466e+07	5.34802	2	2	8.53684	2	3				10.8669	4	4	563	61.3402	13.68
IPI00417182.2	UDP glucuronosyltransferase 1 family, polypeptide A5	1.14847e+08	0	1.11773e+08	0	16.6561	4	5				23.4588	4	8				529	60.0338	13.42
IPI00130950.1	Betaine--homocysteine S-methyltransferase 1	2.15849e+07	5.8264e+06	0	9.02936e+07	6.65995	2	2							11.1073	3	4	407	44.9919	13.02
IPI00122633.3	Acyl-CoA synthetase family member 2, mitochondrial	1.46839e+07	0	0	1.36048e+08										34.3603	7	12	615	67.907	12.85
IPI00114710.3	Pyruvate carboxylase, mitochondrial	2.03188e+08	0	5.54707e+07	2.85863e+08	28.0544	5	10				5.3479	2	2	35.174	9	11	1178	129.602	12.05
IPI00123639.1	Calreticulin	0	0	0	9.77542e+07										7.64414	3	3	416	47.9649	11.54
IPI00153317.3	10-formyltetrahydrofolate dehydrogenase	0	0	0	8.44479e+07										23.6621	7	8	902	98.6465	11.31
IPI00387289.3	Carboxylesterase 3	2.22998e+08	3.22511e+07	0	3.08066e+08	9.8557	3	4							18.1529	4	7	565	61.7487	10.8
IPI00222489.1	carboxylesterase 5	1.43401e+08	4.99181e+07	0	1.26241e+08	10.3251	3	4	5.98785	2	2				12.4172	4	5	559	62.2773	10.55
IPI00845575.2	atlastin GTPase 3 isoform 1	6.42279e+07	0	3.48881e+07	0	6.50048	2	2				7.75794	2	3				536	60.1933	10.45
IPI00116432.1	Dimethylaniline monooxygenase [N-oxide-forming] 1	6.34538e+07	0	1.31743e+08	0							14.4085	5	6				532	59.876	10.34
IPI00405303.1	Putative uncharacterized protein	0	0	6.8255e+07	0							8.71158	3	3				426	47.6519	10.33
IPI00109257.1	Leukotriene-B4 omega-hydroxylase 3	5.90572e+07	0	5.73643e+07	0	8.16737	3	3				12.5141	4	4				524	59.7619	10.31
IPI00111218.1	Aldehyde dehydrogenase, mitochondrial	0	0	9.27989e+07	66417109							13.5188	4	5				519	56.5018	9.83
IPI00130391.1	protease, serine, 1	4.29218e+09	0	4130597774	6201366212	25.3343	2	7				23.3186	2	7				246	26.1178	9.76
IPI00755181.1	keratin complex 1, acidic, gene 10	4.096e+08	0	6.3726e+08	1.45945e+08	17.0882	4	6				23.4205	5	9	13.6981	4	5	561	57.0067	9.63
IPI00127206.6	Fructose-bisphosphate aldolase B	0	0	0	4.68614e+07										13.2669	3	5	364	39.4821	9.62
IPI00470126.4	60 kDa protein	1.80838e+08	0	2.0715e+08	9.08162e+07							28.5481	6	10	10.6711	2	3	563	60.3249	9.41
IPI00850317.1	hypothetical protein isoform 1	6.5931e+07	0	4.41288e+07	0							6.62709	3	3				340	37.8084	7.94
IPI00469268.5	T-complex protein 1 subunit theta	0	0	0	2.91319e+07										12.2767	3	4	548	59.5175	7.3
IPI00117176.1	Fatty-acid amide hydrolase 1	1.17065e+07	0	0	9.80059e+06	10.0785	2	2										579	63.1803	6.91
IPI00875581.1	UDP-glucuronosyltransferase 2B5	8.72528e+07	0	8.32058e+07	0	5.55718	2	2				8.19411	2	3				530	60.8161	6.79
IPI00132593.4	Glutaminase liver isoform, mitochondrial	5.26637e+07	0	0	0	11.0466	3	4										602	66.3232	6.64
IPI00845611.1	Isoform 2 of T-complex protein 1 subunit alpha B	2.04261e+07	0	0	2.71375e+07										7.54224	2	2	507	55.4242	6.51
IPI00153143.1	UDP glucuronosyltransferase 2 family, polypeptide B1	8.72528e+07	0	8.16243e+07	0	4.95155	2	2				7.09616	2	3				529	60.118	5.86
IPI00322610.5	Bifunctional coenzyme A synthase	0	0	0	1.53607e+07										8.89391	2	3	563	61.9846	5.33
IPI00469251.5	Isoform 2 of Thioredoxin reductase 1, cytoplasmic	2.13613e+07	0	0	2.99232e+07										8.47283	2	3	499	54.4627	5.21
IPI00119940.1	Steroid 17-alpha-hydroxylase/17,20 lyase	9.30822e+06	0	0	0	5.8544	2	2										507	57.6012	4.93
IPI00136213.5	Sarcosine dehydrogenase, mitochondrial	7.74154e+07	0	3.81166e+07	0							10.3542	3	4				919	101.618	4.9
IPI00331707.1	Hydroxymethylglutaryl-CoA synthase, cytoplasmic	52330607	0	4.52352e+07	0							4.91864	2	2				520	57.5325	4.62
IPI00124499.2	Keratin, type II cytoskeletal 79	9.56017e+07	0	2.23753e+08	6.52261e+07							9.24297	2	3				531	57.5168	4.14
IPI00625729.2	Keratin, type II cytoskeletal 1	4.2183e+08	0	4.36624e+08	2.43167e+08	8.77062	2	3				9.00057	2	3	11.7543	3	4	637	65.5653	3.77
IPI00330523.1	Propionyl-CoA carboxylase alpha chain, mitochondrial	7.50522e+07	3.49648e+07	0	7.01606e+07	6.33363	2	2							5.40661	2	2	724	79.8711	3.45
IPI00346834.1	Keratin, type II cytoskeletal 2 oral	3.39427e+08	0	1.95748e+08	0							6.9816	2	3				594	62.806	3.37
IPI00875096.1	71 kDa protein	0	0	5.54912e+07	2.38632e+07							8.63762	2	3				701	70.636	3.28

## Sheet: ACV1 -> ALDH4A1
		Area				Control (1)			Control (2)			ACV1 (1)			ACV1 (2)			General information
Accession	Description	Control (1)	Control (2)	ACV1 (1)	ACV1 (2)	Score A2	# Peptides A2	# PSM A2	Score B2	# Peptides B2	# PSM B2	Score C2	# Peptides C2	# PSM C2	Score D2	# Peptides D2	# PSM D2	# AAs	MW [kDa]	ΣCoverage
IPI00310669.3	Bifunctional ATP-dependent dihydroxyacetone kinase/FAD-AMP lyase (cyclizing)	1.25618e+08	2.7284e+08	1.43063e+08	5.12515e+07	36.6332	9	12	88.3805	18	24	30.0945	9	10	17.5432	4	7	578	59.6534	49.13
IPI00308885.6	Isoform 1 of 60 kDa heat shock protein, mitochondrial	5.0224e+07	2.59714e+08	2.27571e+08	0	9.12409	3	4	105.009	16	28	56.7952	10	17				573	60.9174	43.46
IPI00928176.1	aldehyde dehydrogenase 4A1 precursor	4.05201e+08	3.58872e+08	1.89282e+09	1.65545e+09	83.6117	14	25	97.8302	14	29	130.687	13	40	153.371	14	49	562	61.8015	39.68
IPI00312058.5	Catalase	7.71343e+07	9.44253e+07	5.50628e+07	5.44792e+07	31.0988	8	11	55.8585	14	19	21.3803	5	7	24.6827	7	9	527	59.7276	38.33
IPI00115867.4	Liver carboxylesterase 1	6.83085e+07	3.07096e+08	8.67659e+07	3.56536e+07	17.376	5	7	75.9292	14	24	15.9326	5	6				565	62.64	36.99
IPI00929850.1	phosphoglucomutase 2	8.02439e+07	2.57893e+08	1.13824e+08	5.37776e+07	26.3552	8	9	90.3092	16	29	57.134	12	19	19.4165	4	7	562	61.3796	36.48
IPI00126625.1	Isoform 1 of Acyl-coenzyme A synthetase ACSM1, mitochondrial	1.57025e+08	1.10831e+08	6.12383e+07	4.7371e+08	41.208	10	13	38.4264	9	13	19.3279	5	6	73.9002	12	23	573	64.719	34.9
IPI00882287.1	Etfdh protein	7.83247e+07	1.07898e+07	9.03711e+06	2.58647e+08	21.6679	7	8							45.8609	13	16	556	61.122	31.83
IPI00828822.2	Isoform 2 of Liver carboxylesterase 31	5.18077e+08	5.04342e+08	2.7485e+08	1.7626e+08	73.9869	11	25	93.2993	11	31	33.7536	9	13	30.4578	8	12	524	57.8215	31.68
IPI00316314.1	2-hydroxyacyl-CoA lyase 1	2.00128e+08	1.60179e+08	1.30061e+08	1.59496e+07	28.8159	6	10	47.0692	9	15	34.941	8	12				581	63.6189	31.5
IPI00122362.1	Protein disulfide-isomerase A5	1.6119e+08	3.34427e+07	0	1.49215e+08	43.0343	11	15							29.8643	9	12	517	59.229	30.56
IPI00831055.2	Beta-globin	0	7.12817e+07	4.24402e+07	0				14.7069	4	5							147	15.7111	29.93
IPI00111908.8	Carbamoyl-phosphate synthase [ammonia], mitochondrial	1.59555e+08	1.62004e+08	1.14268e+08	1.3949e+08	89.7007	23	30	103.515	27	33	61.6619	19	22	53.7981	15	20	1500	164.514	29.6
IPI00322760.7	proline dehydrogenase	7.89221e+07	0	0	1.60413e+08	20.1571	5	7							61.8499	12	20	599	67.9925	28.71
IPI00321617.1	Isoform 1 of Epoxide hydrolase 2	0	9.15016e+07	0	0				48.9932	12	15							554	62.4746	28.34
IPI00322610.5	Bifunctional coenzyme A synthase	1.93465e+07	7.08493e+07	4.32652e+07	0				33.4577	8	10	21.4058	4	8				563	61.9846	26.82
IPI00881197.1	cytosolic malic enzyme 1	4.11809e+07	1.17001e+08	5.16877e+07	0	10.24	3	3	37.7837	10	11	10.1738	3	4				572	63.9131	26.22
IPI00269811.1	Isoform 2 of Cystathionine beta-synthase	4.04763e+07	1.13044e+08	4.23624e+07	0				35.9751	9	12	7.79805	3	3				547	60.1546	24.13
IPI00553333.2	Hemoglobin subunit beta-1	0	6.55249e+07	3.65074e+07	0				8.29864	3	3	5.65392	2	2				147	15.8301	23.81
IPI00114710.3	Pyruvate carboxylase, mitochondrial	1.82321e+08	1.69675e+08	9.48886e+07	2.48443e+08	58.3015	15	20	58.9085	15	20	21.5033	6	7	54.8252	12	20	1178	129.602	21.99
IPI00126913.5	Isoform 1 of ATPase family AAA domain-containing protein 3	1.79072e+07	0	0	7.90304e+07	8.83777	3	3							17.2559	7	7	591	66.7006	17.6
IPI00885570.1	Beta-actin (Fragment)	1.68456e+07	0	0	0	4.76981	2	2										121	13.5306	17.36
IPI00226140.5	Amine oxidase [flavin-containing] B	6.16483e+07	4.57217e+07	0	2.13019e+07	17.221	6	6	4.53653	2	2							520	58.5063	17.31
IPI00120165.1	Peroxisomal carnitine O-octanoyltransferase	3.19107e+07	2.58243e+07	0	2.09723e+07	19.7939	5	6	12.5532	3	4				12.9627	3	4	612	70.2191	16.83
IPI00122557.2	esterase 31-like isoform 1	3.61052e+08	3.84622e+08	9.53645e+07	1.31974e+08	35.3797	5	12	47.7872	5	16	19.1156	5	7	22.3503	5	9	571	63.3125	15.94
IPI00110658.1	Putative uncharacterized protein	0	4.69248e+07	2.80381e+07	0				5.66102	2	2	4.77271	2	2				142	15.1928	14.79
IPI00128399.3	Putative uncharacterized protein	7.41594e+07	2.09723e+08	1.23504e+08	0				30.2956	6	9							561	61.5732	14.44
IPI00122633.3	Acyl-CoA synthetase family member 2, mitochondrial	3.61307e+07	4.74377e+07	3.43528e+07	0	16.4612	4	6	20.1342	5	6	12.7788	4	5				615	67.907	14.15
IPI00130950.1	Betaine--homocysteine S-methyltransferase 1	4.42845e+07	9.29215e+07	9.6193e+07	4.69522e+07	9.31291	3	3	17.0246	4	6							407	44.9919	12.53
IPI00875862.1	48 kDa protein	4.59274e+07	0	0	0	17.2399	6	7										428	47.9704	12.38
IPI00759881.1	very-long-chain acyl-CoA dehydrogenase VLCAD homolog precursor	6.68061e+07	2.20643e+07	21533657	0	15.9883	5	5	6.55529	2	2							625	68.6787	11.68
IPI00775829.1	pyruvate kinase, liver and RBC isoform 2	0	4.21569e+07	0	0				12.389	4	4							543	58.7838	11.6
IPI00127206.6	Fructose-bisphosphate aldolase B	0	1.90608e+07	1.61799e+07	1.27575e+07				9.02372	3	3							364	39.4821	10.71
IPI00130391.1	protease, serine, 1	4.37232e+09	3.32256e+09	5.00144e+09	7034151392	30.8992	2	9	70.5933	2	23							246	26.1178	9.76
IPI00116283.1	T-complex protein 1 subunit gamma	4.17363e+07	4.70356e+07	1.99887e+07	1.83944e+07	10.4085	2	4	12.9729	4	5				4.9518	2	2	545	60.5914	9.72
IPI00755181.1	keratin complex 1, acidic, gene 10	6.24812e+07	8.12637e+07	8.98438e+07	7.47977e+07	14.4036	3	5	12.693	3	4	7.49127	3	3	12.1158	5	5	561	57.0067	9.63
IPI00470126.4	60 kDa protein	9.44419e+07	1.01438e+08	3.9265e+07	100245488	12.2444	4	4	13.8825	3	5							563	60.3249	9.06
IPI00116281.3	T-complex protein 1 subunit zeta	0	2.04417e+07	0	0				8.94763	3	3							531	57.9677	8.85
IPI00134746.5	Argininosuccinate synthase	0	3.40232e+07	0	0				10.2404	3	4							412	46.555	7.04
IPI00117176.1	Fatty-acid amide hydrolase 1	1.03538e+07	0	0	0	10.5855	2	2										579	63.1803	6.91
IPI00352124.2	flavin containing monooxygenase 5	3.8599e+07	3.81697e+07	0	0				9.70725	3	3							533	59.962	6.75
IPI00221556.2	Isoform 1 of Acyl-coenzyme A synthetase ACSM5, mitochondrial	4.23861e+07	3.27767e+07	0	4.25599e+07	9.47004	2	4	8.05702	3	3				9.88607	3	4	578	64.2876	6.57
IPI00469268.5	T-complex protein 1 subunit theta	0	3.56677e+07	1.76607e+07	0				10.0318	3	3							548	59.5175	6.57
IPI00116279.3	T-complex protein 1 subunit epsilon	0	2.05779e+07	1.55161e+07	0				11.1389	2	3							541	59.5859	6.1
IPI00123639.1	Calreticulin	0	2.7164e+07	0	0				8.31985	2	3							416	47.9649	5.77
IPI00124499.2	Keratin, type II cytoskeletal 79	8.12514e+07	5.88167e+07	0	2.63561e+07	6.4064	2	2	5.73401	2	2							531	57.5168	5.46
IPI00678532.3	Regulator of microtubule dynamics protein 3	3.03655e+07	0	0	0	6.29653	2	2										470	51.997	5.11
IPI00109221.3	Phosphatidylinositide phosphatase SAC1	3.34533e+07	0	0	0	9.66845	3	4										587	66.9009	4.94
IPI00625729.2	Keratin, type II cytoskeletal 1	2.26684e+08	2.16793e+08	2.66757e+08	4.38846e+08	8.645	2	3	18.6435	4	6	10.0546	2	3	15.0762	2	5	637	65.5653	4.87
IPI00230440.6	Adenosylhomocysteinase	0	2.52753e+07	0	0				6.34336	2	2							432	47.6573	4.86
IPI00154043.1	MCG23407	0	4.69408e+07	0	7.94544e+07										5.59216	2	2	558	61.9002	4.66
IPI00403233.1	Putative uncharacterized protein	2.28858e+07	15337424	0	0	4.76925	2	2										495	54.2954	4.44
IPI00875096.1	71 kDa protein	3.96456e+07	5.42071e+07	6.0619e+07	9.15252e+07				10.8538	3	4	8.20708	2	3	8.06238	2	3	701	70.636	4.28
IPI00153317.3	10-formyltetrahydrofolate dehydrogenase	0	2.73945e+07	1.19358e+07	0				12.2619	2	3							902	98.6465	3.99
IPI00320204.4	hypothetical protein LOC72361	2.9989e+07	0	0	0	5.04992	2	2										560	62.6805	3.93

## Sheet: ACV1 -> ALDH6A1
		Area				Control (1)			Control (2)			ACV1 (1)			ACV1 (2)			General information
Accession	Description	Control (1)	Control (2)	ACV1 (1)	ACV1 (2)	Score A2	# Peptides A2	# PSM A2	Score B2	# Peptides B2	# PSM B2	Score C2	# Peptides C2	# PSM C2	Score D2	# Peptides D2	# PSM D2	# AAs	MW [kDa]	ΣCoverage
IPI00312058.5	Catalase	5.30579e+08	2.74946e+09	1.08787e+09	1.77092e+09	56.4769	5	16	196.404	22	63	114.962	17	36	141.409	19	46	527	59.7276	55.22
IPI00461964.3	Methylmalonate-semialdehyde dehydrogenase [acylating], mitochondrial	0	6.78551e+08	7.04812e+08	3.09388e+09				71.2327	13	22	49.2511	10	18	237.815	19	71	535	57.8785	49.72
IPI00129011.1	Formimidoyltransferase-cyclodeaminase	0	1.49865e+08	4.06671e+08	1.76053e+08				37.8725	9	13	39.9208	11	15	34.873	10	11	541	58.9015	42.7
IPI00122815.3	Putative uncharacterized protein	0	3.24661e+08	1.22945e+08	3.43788e+08				69.1271	14	21	39.0424	6	13	94.1798	15	29	509	57.0228	41.26
IPI00606510.1	Propionyl-CoA carboxylase beta chain, mitochondrial	0	3.1892e+08	8.29182e+07	2.48828e+08				47.1008	13	15	23.7285	5	8	44.3749	13	15	541	58.3569	39
IPI00230108.6	Protein disulfide-isomerase A3	2.38337e+07	3.44957e+08	9.44056e+07	2.81661e+08				49.5016	13	18	24.3535	7	10	47.9459	14	18	505	56.6427	37.82
IPI00352124.2	flavin containing monooxygenase 5	0	7.78999e+08	0	2.17745e+08				58.4133	15	20				23.8792	6	9	533	59.962	30.39
IPI00267407.1	Aldehyde dehydrogenase family 8 member A1	4.1325e+07	1.72489e+08	9.48046e+07	1.66846e+08	7.45076	2	2	39.7506	8	11	15.9275	3	4	39.7346	6	10	487	53.6295	29.98
IPI00226140.5	Amine oxidase [flavin-containing] B	6.00795e+07	8.12855e+08	4.94052e+07	2.79625e+08				61.6112	10	20				13.1562	4	5	520	58.5063	29.42
IPI00126508.1	Dimethylaniline monooxygenase [N-oxide-forming] 3	0	2.63961e+08	0	3.25493e+08				44.9422	12	16				49.2235	10	18	534	60.4767	27.53
IPI00828469.1	Isoform 2 of Cytosol aminopeptidase	0	8.29984e+07	1.46217e+08	8.84931e+07				14.5345	5	6	40.7264	10	15	20.2606	6	8	488	52.7168	25.41
IPI00321617.1	Isoform 1 of Epoxide hydrolase 2	4.40313e+07	8.83274e+07	0	0	19.1324	5	5	10.8053	3	4							554	62.4746	24.55
IPI00115867.4	Liver carboxylesterase 1	4.13955e+07	3.3153e+08	0	122207346	16.3804	4	5	28.0464	7	10							565	62.64	24.42
IPI00890092.1	Alpha-aminoadipic semialdehyde dehydrogenase	0	185653901	1.47202e+08	2.93818e+08				13.5387	3	4	19.3829	4	6	28.242	8	9	511	55.6096	24.27
IPI00874456.1	Dihydrolipoyl dehydrogenase, mitochondrial	0	2.01463e+08	9.79413e+07	1.94698e+08				33.2716	9	11	21.9204	4	7	29.1833	7	9	509	54.2382	23.97
IPI00471231.2	UDP-glucuronosyltransferase 2A3	0	6.05719e+08	0	4.34917e+08				19.7468	6	8				29.6622	8	11	534	61.0793	23.6
IPI00928176.1	aldehyde dehydrogenase 4A1 precursor	0	1.01861e+07	6.95922e+07	1.40273e+08							22.7913	4	7	29.0567	7	9	562	61.8015	17.97
IPI00111908.8	Carbamoyl-phosphate synthase [ammonia], mitochondrial	69381985	3.08949e+08	8.53514e+07	2.45595e+08	25.7131	6	7	78.3784	19	26	16.8633	6	6	41.6073	12	14	1500	164.514	17.27
IPI00318577.1	Dihydropyrimidinase	0	9.59219e+07	1.30726e+08	1.45012e+08				24.5641	5	7	4.43651	2	2	23.3662	5	8	519	56.6886	16.76
IPI00134691.3	UDP-glucuronosyltransferase 1-1	0	1.30498e+08	0	2.81568e+08				19.362	4	5				28.1757	5	9	535	60.084	13.46
IPI00881557.1	47 kDa protein	0	0	1.00868e+08	0							17.1973	5	7				426	47.3803	13.15
IPI00128399.3	Putative uncharacterized protein	1.65997e+07	1.34733e+08	0	0	7.64953	2	2	9.61382	3	3							561	61.5732	12.66
IPI00130950.1	Betaine--homocysteine S-methyltransferase 1	5.8264e+06	2.15849e+07	5.08284e+07	5.38841e+06				6.65995	2	2				6.05375	2	2	407	44.9919	11.06
IPI00417182.2	UDP glucuronosyltransferase 1 family, polypeptide A5	0	1.14847e+08	0	2.35876e+08				16.6561	4	5				17.96	4	6	529	60.0338	10.96
IPI00331707.1	Hydroxymethylglutaryl-CoA synthase, cytoplasmic	0	52330607	4.60315e+07	5.75958e+07							11.4068	4	5	4.89275	2	2	520	57.5325	10
IPI00308885.6	Isoform 1 of 60 kDa heat shock protein, mitochondrial	5.38404e+07	7.47022e+07	0	0				20.2419	5	7							573	60.9174	9.95
IPI00130391.1	protease, serine, 1	0	4.29218e+09	1.36751e+09	4.21573e+09				25.3343	2	7				28.3378	2	9	246	26.1178	9.76
IPI00169666.3	UDP glucuronosyltransferase 2 family, polypeptide B34	0	2.83334e+08	0	3.36705e+08				24.1685	4	8				7.06861	2	3	532	60.8374	9.59
IPI00132593.4	Glutaminase liver isoform, mitochondrial	0	5.26637e+07	8.68191e+06	2.25499e+07				11.0466	3	4				5.27733	2	2	602	66.3232	8.64
IPI00222489.1	carboxylesterase 5	4.99181e+07	1.43401e+08	0	8.18276e+07	5.98785	2	2	10.3251	3	4				7.82436	2	3	559	62.2773	8.05
IPI00755181.1	keratin complex 1, acidic, gene 10	0	4.096e+08	3.22356e+08	4.04816e+08				17.0882	4	6	15.8195	4	6	18.5931	4	7	561	57.0067	8.02
IPI00845575.2	atlastin GTPase 3 isoform 1	0	6.42279e+07	0	0				6.50048	2	2							536	60.1933	7.84
IPI00553717.6	Methylcrotonoyl-CoA carboxylase beta chain, mitochondrial	4.79288e+07	6.50104e+07	0	0	8.53684	2	3	5.34802	2	2							563	61.3402	7.82
IPI00669556.2	Glucose-6-phosphate isomerase	0	1.37227e+07	1.25654e+08	0							11.9547	2	4				344	38.2586	7.56
IPI00153143.1	UDP glucuronosyltransferase 2 family, polypeptide B1	0	8.72528e+07	0	8.64249e+07				4.95155	2	2				8.22375	2	3	529	60.118	7.56
IPI00858095.1	Putative uncharacterized protein	0	6.34538e+07	0	1.01451e+08										6.64876	2	3	303	34.2203	6.93
IPI00117176.1	Fatty-acid amide hydrolase 1	0	1.17065e+07	0	0				10.0785	2	2							579	63.1803	6.91
IPI00387289.3	Carboxylesterase 3	3.22511e+07	2.22998e+08	0	122207346				9.8557	3	4							565	61.7487	6.73
IPI00153144.3	Sulfite oxidase, mitochondrial	0	8.41888e+07	0	0				7.9903	2	2							546	60.7178	6.23
IPI00114710.3	Pyruvate carboxylase, mitochondrial	0	2.03188e+08	2.2354e+07	6.56469e+07				28.0544	5	10				9.36905	2	3	1178	129.602	5.6
IPI00109257.1	Leukotriene-B4 omega-hydroxylase 3	0	5.90572e+07	0	5.29005e+07				8.16737	3	3				12.0697	2	4	524	59.7619	5.53
IPI00120197.1	Cytochrome P450 4V3	0	1.8955e+07	0	5.48042e+07				6.89942	2	2							525	60.8995	5.52
IPI00119940.1	Steroid 17-alpha-hydroxylase/17,20 lyase	0	9.30822e+06	0	1.3815e+07				5.8544	2	2							507	57.6012	4.93
IPI00323816.5	Selenium-binding protein 2	0	6.97643e+07	4.41716e+07	1.33135e+08							11.6376	2	4				472	52.5764	4.24
IPI00470126.4	60 kDa protein	0	1.80838e+08	3.74623e+07	4.08758e+07										6.59233	2	2	563	60.3249	3.91
IPI00316314.1	2-hydroxyacyl-CoA lyase 1	4.29732e+07	5.11746e+07	0	0				7.62225	2	3							581	63.6189	3.79
IPI00625729.2	Keratin, type II cytoskeletal 1	0	4.2183e+08	1.98998e+08	3.34392e+08				8.77062	2	3	10.3366	2	3	6.55812	2	2	637	65.5653	3.61
IPI00330523.1	Propionyl-CoA carboxylase alpha chain, mitochondrial	3.49648e+07	7.50522e+07	0	4.42929e+07				6.33363	2	2							724	79.8711	3.45

## Sheet: ACV2 -> ALDH1A1
		Area		Control			ACV2			General information
Accession	Description	Control	ACV2	Score A2	# Peptides A2	# PSM A2	Score B2	# Peptides B2	# PSM B2	# AAs	MW [kDa]	ΣCoverage
IPI00626662.3	Retinal dehydrogenase 1	2.97747e+08	5.9926e+09	89.9576	15	29	273.913	25	82	501	54.4328	55.69
IPI00129011.1	Formimidoyltransferase-cyclodeaminase	3.43576e+08	8.42135e+08	99.1019	15	30	67.1117	12	21	541	58.9015	46.21
IPI00312058.5	Catalase	3.28574e+08	2.2558e+09	83.4561	14	29	144.329	20	47	527	59.7276	43.07
IPI00267407.1	Aldehyde dehydrogenase family 8 member A1	2.07516e+08	9.30434e+08	84.1942	11	24	75.4985	12	21	487	53.6295	40.25
IPI00114209.1	Glutamate dehydrogenase 1, mitochondrial	1.24739e+09	2.43795e+09	145.946	17	52	101.111	17	35	558	61.2982	38.35
IPI00623845.3	Selenium-binding protein 1	2.56192e+08	5.76481e+08	78.0936	12	27	48.1333	9	16	472	52.4804	37.92
IPI00323816.5	Selenium-binding protein 2	2.56192e+08	5.76481e+08	75.3561	12	26	48.1333	9	16	472	52.5764	37.29
IPI00318577.1	Dihydropyrimidinase	2.75399e+08	4.96012e+08	75.06	14	23	63.9984	11	19	519	56.6886	37.19
IPI00828469.1	Isoform 2 of Cytosol aminopeptidase	1.27983e+08	3.68346e+08	45.3153	12	16	30.6314	8	11	488	52.7168	36.89
IPI00461964.3	Methylmalonate-semialdehyde dehydrogenase [acylating], mitochondrial	5.46064e+08	1.15385e+09	105.339	13	35	85.768	13	30	535	57.8785	36.82
IPI00336362.2	Aldehyde dehydrogenase, cytosolic 1	1.25436e+08	3.18525e+09	38.6111	8	13	117.837	15	37	501	54.553	36.73
IPI00857439.1	55 kDa protein	1.60894e+08	2.60407e+08	44.1366	10	14	30.2424	7	10	503	54.5607	32.41
IPI00122815.3	Putative uncharacterized protein	1.47293e+07	3.45214e+08				45.4812	10	15	509	57.0228	27.5
IPI00403810.2	Tubulin alpha-1C chain	1.08202e+08	2.90872e+08	19.063	5	6	27.0309	6	9	449	49.8775	26.95
IPI00649994.1	Adenylyl cyclase-associated protein	0	5.55301e+06				9.06878	2	2	164	17.883	25.61
IPI00279474.1	Isoform 2 of UTP--glucose-1-phosphate uridylyltransferase	1.97606e+08	6.2328e+08	38.644	6	13	55.8672	10	16	497	55.6811	25.55
IPI00553333.2	Hemoglobin subunit beta-1	4.82528e+07	1.14216e+08				13.4458	3	5	147	15.8301	23.81
IPI00117350.1	Tubulin alpha-4A chain	8.99069e+07	2.44564e+08	12.385	4	4	19.9007	5	7	448	49.8924	22.77
IPI00606510.1	Propionyl-CoA carboxylase beta chain, mitochondrial	2.64058e+07	2.34102e+08	11.2011	3	3	37.1586	8	12	541	58.3569	22.55
IPI00111218.1	Aldehyde dehydrogenase, mitochondrial	2.15633e+07	1.59751e+08	5.30106	2	2	24.9618	6	8	519	56.5018	21
IPI00169463.1	Tubulin beta-2C chain	6.6952e+07	7.19996e+07	26.8801	6	9	7.57678	2	2	445	49.799	20.45
IPI00118344.1	UDP-glucose 6-dehydrogenase	1.04794e+08	2.21028e+08	12.9087	3	4	22.5193	5	6	493	54.7973	18.46
IPI00111908.8	Carbamoyl-phosphate synthase [ammonia], mitochondrial	7.44828e+07	4.37906e+08	40.3118	13	14	78.4978	17	25	1500	164.514	16.87
IPI00315879.1	Cytosolic non-specific dipeptidase	7.78509e+07	1.10898e+08	26.4895	7	11	17.9537	4	7	475	52.7336	16.42
IPI00126508.1	Dimethylaniline monooxygenase [N-oxide-forming] 3	1.25404e+08	3.19696e+08	21.3962	6	7	9.16139	3	3	534	60.4767	15.92
IPI00114710.3	Pyruvate carboxylase, mitochondrial	3.30782e+08	8.79697e+08	69.7564	12	23	45.2221	12	14	1178	129.602	15.87
IPI00134691.3	UDP-glucuronosyltransferase 1-1	8.64064e+07	1.976e+08	27.0333	5	10	22.0859	4	6	535	60.084	15.33
IPI00669556.2	Glucose-6-phosphate isomerase	6.59733e+07	1.78199e+08	20.531	4	7	5.0284	2	2	344	38.2586	15.12
IPI00330523.1	Propionyl-CoA carboxylase alpha chain, mitochondrial	4.90045e+07	2.06493e+08	14.8447	3	6	25.24	7	8	724	79.8711	14.92
IPI00652521.1	Putative uncharacterized protein	3.01122e+07	102315400	13.5322	4	5	6.08075	2	2	494	54.8184	14.37
IPI00874456.1	Dihydrolipoyl dehydrogenase, mitochondrial	3.9795e+07	2.09738e+08	10.867	3	4	19.4627	5	6	509	54.2382	13.56
IPI00420752.7	Mccc2 protein	0	1.1174e+08				11.4746	3	4	306	33.2791	12.75
IPI00469251.5	Isoform 2 of Thioredoxin reductase 1, cytoplasmic	2.12337e+07	1.04961e+08				15.2921	4	5	499	54.4627	12.42
IPI00890092.1	Alpha-aminoadipic semialdehyde dehydrogenase	6.4983e+07	1.93578e+08	11.606	2	4	7.40123	2	2	511	55.6096	12.13
IPI00858095.1	Putative uncharacterized protein	4.67608e+07	1.15581e+08	11.2379	3	4				303	34.2203	11.88
IPI00352124.2	flavin containing monooxygenase 5	2.62814e+07	2.62611e+08				22.8566	5	8	533	59.962	10.88
IPI00331707.1	Hydroxymethylglutaryl-CoA synthase, cytoplasmic	7.72372e+07	2.26956e+08	10.1793	3	4	22.3974	4	9	520	57.5325	10.38
IPI00228491.1	Nicotinate phosphoribosyltransferase	3.1966e+07	1.08686e+08	6.35174	2	2	13.6806	4	4	538	58.2284	10.04
IPI00755181.1	keratin complex 1, acidic, gene 10	5.10636e+08	5.1989e+08	41.5909	5	15	12.7351	3	5	561	57.0067	9.63
IPI00653274.1	Brain cDNA, clone MNCb-1272, similar to Mus musculus chaperonin subunit 2 (beta) (Cct2), mRNA	0	1.18855e+08				11.0781	3	3	488	52.4356	9.22
IPI00113073.3	Aldehyde dehydrogenase X, mitochondrial	3.00778e+07	8.77157e+07	8.50453	3	3	7.80799	2	3	519	57.5165	8.67
IPI00153294.2	Xylulose kinase	3.25222e+07	0	6.9546	2	2				551	59.5057	8.35
IPI00331174.5	T-complex protein 1 subunit eta	0	3.27328e+07				10.6497	2	3	544	59.6141	8.09
IPI00308885.6	Isoform 1 of 60 kDa heat shock protein, mitochondrial	0	8.35404e+07				8.18174	3	3	573	60.9174	8.03
IPI00405699.2	Delta-1-pyrroline-5-carboxylate dehydrogenase, mitochondrial	0	8.99975e+07				24.306	3	7	562	61.7716	7.83
IPI00128121.1	Carboxylesterase ML3	0	1.3236e+08				8.12919	3	3	561	62.429	7.31
IPI00279079.1	Fibrinogen beta chain	2.62614e+07	94613124	8.10518	2	2				481	54.7177	6.86
IPI00461393.2	FGGY carbohydrate kinase domain containing	674113	6.86273e+07				9.98933	2	3	464	50.2833	6.68
IPI00227140.1	Keratin, type I cytoskeletal 14	4.78333e+07	98044035	11.756	2	5	10.5839	2	4	484	52.8339	6.4
IPI00153144.3	Sulfite oxidase, mitochondrial	0	8.51412e+07				7.24437	2	2	546	60.7178	6.04
IPI00153143.1	UDP glucuronosyltransferase 2 family, polypeptide B1	4.78745e+07	1.2092e+08	5.63636	2	2	9.13786	2	4	529	60.118	5.86
IPI00330480.1	35 kDa protein	1.72439e+08	3.53841e+08				12.1654	2	4	324	35.1436	5.86
IPI00471231.2	UDP-glucuronosyltransferase 2A3	0	7.24028e+07				7.77418	3	3	534	61.0793	5.62
IPI00625729.2	Keratin, type II cytoskeletal 1	3.21933e+08	5.18568e+08	27.6302	3	9	20.1373	4	7	637	65.5653	4.87
IPI00115867.4	Liver carboxylesterase 1	7.08283e+06	1.22642e+08				6.18384	2	2	565	62.64	4.6
IPI00387289.3	Carboxylesterase 3	0	1.4345e+08				5.78792	2	2	565	61.7487	4.6
IPI00131695.3	Serum albumin	0	9.58764e+07				5.10499	2	2	608	68.6477	4.11
IPI00124499.2	Keratin, type II cytoskeletal 79	6.63989e+07	1.53248e+08				9.05008	2	3	531	57.5168	3.58
IPI00120123.1	Dimethylglycine dehydrogenase, mitochondrial	0	35214905				8.28789	2	3	869	97.194	3.11
IPI00875096.1	71 kDa protein	1.15059e+08	1.1434e+08				7.71171	2	3	701	70.636	3
