# Supplementary material for: Target discovery of acivicin in cancer cells elucidates its mechanism of growth inhibition
Source: Chem Sci. 2014 Sep 16;6(1):237–45. doi: 10.1039/c4sc02339k (PMC4285139; doi:10.1039/c4sc02339k)
Supplement: Supplementary file 2 [file SC-006-C4SC02339K-s002.xlsx]

## Sheet: ACVL1 -> ALDH1A1
		Area				Control (1)			Control (2)			ACVL1 (1)			ACVL1 (2)			General information
Accession	Description	Control (1)	Control (2)	ACVL1 (1)	ACVL1 (2)	Score A2	# Peptides A2	# PSM A2	Score B2	# Peptides B2	# PSM B2	Score C2	# Peptides C2	# PSM C2	Score D2	# Peptides D2	# PSM D2	# AAs	MW [kDa]	ΣCoverage
IPI00218914.5	Retinal dehydrogenase 1	0	5.3799e+07	2.04156e+09	1.13581e+10				12.9274	4	4	419.203	29	132	652.477	28	208	501	54.827	74.65
IPI00019359.4	Keratin, type I cytoskeletal 9	0	683450261	5.94664e+07	4.12857e+08				129.262	19	35	49.0695	9	12	64.3116	14	18	623	62.0268	70.14
IPI00031420.3	UDP-glucose 6-dehydrogenase	0	1.7716e+09	6.32324e+07	1.02341e+09				163.861	25	49	62.6705	14	20	90.6955	21	27	494	54.9893	68.42
IPI00025252.1	Protein disulfide-isomerase A3	0	9.6627e+08	6.19478e+08	9.77211e+09				100.69	20	31	190.112	24	64	384.366	31	120	505	56.7468	66.73
IPI00006663.1	Aldehyde dehydrogenase, mitochondrial	0	0	6.67921e+08	6.9189e+09							162.085	21	49	293.306	22	85	517	56.3456	65.57
IPI00893541.1	14 kDa protein	0	8.13854e+08	4.57851e+08	8.26972e+09				19.1877	4	6	47.8444	6	16	46.1306	6	15	123	13.5108	60.16
IPI00007247.4	Propionyl-CoA carboxylase beta chain, mitochondrial	0	1.54539e+08	1.27277e+08	1.23389e+09				41.2669	11	13	80.3941	19	26	146.551	25	45	539	58.1788	58.81
IPI00009865.4	Keratin, type I cytoskeletal 10	1.09504e+07	1.53548e+09	1.50333e+08	2.44355e+09	23.3207	6	6	155.686	23	46	107.553	17	32	131.491	24	40	584	58.7917	56.16
IPI00010796.1	Protein disulfide-isomerase	0	2531534200	1.34448e+07	1.99007e+08				275.226	20	77	18.1446	5	6	35.812	11	12	508	57.0807	56.1
IPI00220327.4	Keratin, type II cytoskeletal 1	2.18947e+07	2.12652e+09	1.52864e+08	1.20381e+09	27.5934	5	7	266.477	28	73	81.7501	14	23	108.855	20	32	644	65.999	51.4
IPI00784154.1	60 kDa heat shock protein, mitochondrial	0	1.23637e+09	0	3.21163e+08				143.25	18	40				31.4358	11	11	573	61.0164	50.09
IPI01015038.1	T-complex protein 1 subunit delta	0	5.52719e+08	0	3.98625e+08				85.3058	16	25				50.9357	13	16	483	52.2979	49.28
IPI00384280.5	Prenylcysteine oxidase 1	0	3.98282e+08	5.13884e+07	1.42158e+09				49.6846	11	15	20.7054	6	7	82.6109	15	29	505	56.6037	48.51
IPI00004968.1	Pre-mRNA-processing factor 19	0	1.65754e+08	3.92349e+07	945523990				40.2538	9	12	15.1976	5	5	61.7861	10	19	504	55.1463	46.23
IPI00783118.2	5'-nucleotidase domain-containing protein 2 isoform 1	0	1.304e+08	3.88726e+07	6.27494e+08				41.3574	11	13	31.4679	8	10	57.9737	13	18	557	64.1033	45.6
IPI00021304.1	Keratin, type II cytoskeletal 2 epidermal	1.11277e+07	1.5327e+09	7.96148e+07	9.68968e+08	14.158	3	4	99.565	21	30	43.3985	8	13	65.6103	17	20	645	65.8254	44.96
IPI00909059.5	cDNA FLJ53910, highly similar to Keratin, type II cytoskeletal 6A	0	2.03534e+08	0	7.54658e+08				60.1173	15	19				80.2398	19	26	535	57.8032	44.86
IPI01025367.1	56 kDa protein	0	5.63913e+07	5.10337e+07	9.7356e+08				8.66985	3	3	39.2613	12	15	69.6616	17	23	522	56.1917	44.64
IPI00930688.1	Tubulin alpha-1B chain	0	2.39795e+08	9.86433e+07	2.20531e+09				29.5296	8	9	42.9198	11	13	96.9193	13	29	451	50.1196	44.12
IPI00011200.5	D-3-phosphoglycerate dehydrogenase	0	8.10407e+07	4.76077e+07	1.442e+09				22.6186	7	7	47.5362	11	13	84.5513	14	24	533	56.6144	43.34
IPI00215687.1	Isoform 3 of Glutaminase kidney isoform, mitochondrial	0	1.72001e+08	2.91677e+07	7.11694e+08				45.644	9	12	12.8267	3	4	83.5272	15	23	598	65.4179	41.97
IPI00956313.2	Uncharacterized protein	0	2.03534e+08	0	7.54658e+08				57.3182	14	18				74.6333	18	24	549	58.4325	41.89
IPI00963899.3	cDNA FLJ38173 fis, clone FCBBF1000053, highly similar to HYDROXYMETHYLGLUTARYL-COA SYNTHASE, CYTOPLASMIC	0	2.0755e+08	6.53581e+07	1.49089e+09				30.8545	8	9	30.2719	9	11	76.1096	14	21	509	56.2029	41.65
IPI01014382.2	Uncharacterized protein	0	1.09415e+08	2.84421e+07	6.00635e+08				19.7629	6	6	18.4288	6	6	68.0432	17	21	490	54.2526	40.61
IPI00152432.2	Isoform 1 of Alanine aminotransferase 2	0	0	0	3.49006e+08										70.661	13	20	523	57.8664	39.96
IPI00607693.2	liver carboxylesterase 1 isoform c precursor	0	5.70642e+08	0	0				104.171	17	29							566	62.3531	38.69
IPI00179964.5	Isoform 1 of Polypyrimidine tract-binding protein 1	0	1.97198e+08	3.11395e+07	1.00797e+09				29.0331	6	8	18.3903	5	5	51.3164	8	15	531	57.1856	38.61
IPI00784044.1	Isoform 1 of Methylcrotonoyl-CoA carboxylase beta chain, mitochondrial	0	3.86145e+08	0	0				102.074	18	27							563	61.2944	37.66
IPI00908881.3	Glucose-6-phosphate isomerase	0	4.13276e+08	5.06977e+07	2.95264e+09				71.1624	8	20	34.8521	8	12	168.364	14	53	531	59.9526	37.66
IPI00479186.7	Isoform M2 of Pyruvate kinase isozymes M1/M2	0	2.82008e+08	0	0				63.7285	13	17							531	57.9	36.72
IPI00910144.2	Uncharacterized protein	0	1.27858e+08	0	2.38573e+08				34.3928	11	11				40.9936	12	13	478	52.4445	36.61
IPI00298497.3	Fibrinogen beta chain	0	2.54805e+08	2.44468e+07	5.56867e+08				59.7118	13	17	15.9682	3	5	62.7348	13	18	491	55.8923	36.25
IPI00465436.4	Catalase	0	7.11418e+08	0	1.71091e+08				83.1009	15	24				21.7319	7	7	527	59.7188	36.24
IPI00910738.1	cDNA FLJ60647, highly similar to Keratin, type II cytoskeletal 6B	0	1.9637e+08	0	5.38182e+08				42.6056	11	13				49.4097	13	15	526	55.6981	35.55
IPI00647896.1	Uncharacterized protein	0	0	0	140839632										37.748	9	10	372	41.7151	33.6
IPI00514561.1	cDNA FLJ54552, highly similar to Heterogeneous nuclear ribonucleoprotein K	0	1.17099e+08	3.55336e+07	5.2839e+08				37.7992	8	10	27.7904	6	8	50.321	10	14	428	47.5276	32.94
IPI00008274.8	Isoform 1 of Adenylyl cyclase-associated protein 1	0	1.22862e+08	1.59779e+07	4.25456e+08				13.3906	4	4	24.5249	5	6	29.3877	10	10	475	51.8687	32.21
IPI00103467.5	Aldehyde dehydrogenase X, mitochondrial	0	0	0	1.44509e+09										66.739	12	19	517	57.1702	31.53
IPI00792478.1	tubulin alpha-8 chain isoform 2	0	1.73416e+08	9.61827e+07	1.66864e+09				11.2514	4	4	24.1565	5	7	43.629	8	14	383	42.9262	31.33
IPI00027424.3	Isoform 1 of Glycerol kinase	0	8.46598e+07	0	4.3353e+08				19.1812	6	6				39.484	12	13	524	57.4521	31.3
IPI00007752.1	Tubulin beta-2C chain	0	0	0	1.47194e+08										41.4179	10	11	445	49.799	30.79
IPI00952607.1	T-complex protein 1 subunit eta isoform d	0	5.69317e+08	0	1.53207e+08				62.4588	11	17				10.6959	4	4	499	54.7695	30.66
IPI00257882.7	Xaa-Pro dipeptidase	0	1.41648e+08	2.09588e+07	3.01229e+08				19.7778	5	6	22.3597	6	7	26.7771	8	8	493	54.5129	30.02
IPI00009867.3	Keratin, type II cytoskeletal 5	0	2.04507e+08	0	5.09353e+08				48.2749	12	18				49.1331	12	17	590	62.34	29.83
IPI00410017.1	Isoform 2 of Polyadenylate-binding protein 1	0	2.86054e+08	0	8.4378e+07				67.6771	12	21				14.3703	5	5	547	61.142	29.07
IPI00465170.1	Isoform 1 of 5'-nucleotidase domain-containing protein 3	0	0	1.3351e+07	2.98842e+08							13.073	4	5	44.7045	12	14	548	63.3791	29.01
IPI00302925.4	59 kDa protein	0	1.42182e+08	0	0				40.9094	14	14							547	59.4404	28.88
IPI01011421.2	Dihydrolipoyl dehydrogenase	0	6.60574e+08	2.76755e+07	8.31632e+08				65.3018	7	16	13.9483	4	5	53.866	8	14	459	48.8503	27.89
IPI00017617.1	Probable ATP-dependent RNA helicase DDX5	0	1.8315e+08	1.93e+07	4.50674e+08				35.5687	12	13	11.1258	2	4	39.1764	13	14	614	69.1047	27.04
IPI00883950.1	Similar to cytoskeleton-associated protein 4 (Fragment)	0	3.91054e+07	0	1.78019e+08				13.2667	4	4				33.9899	10	10	560	62.023	25.54
IPI00939159.6	Adenylyl cyclase-associated protein	0	1.11811e+08	9.03296e+06	3.21554e+08				6.50765	2	2	11.0843	3	3	24.9973	8	8	433	47.0913	25.17
IPI00219005.3	Peptidyl-prolyl cis-trans isomerase FKBP4	0	0	0	1.86312e+08										31.8396	7	8	459	51.7721	25.05
IPI00295400.1	Isoform 1 of Tryptophanyl-tRNA synthetase, cytoplasmic	0	0	0	1.64969e+08										27.3461	7	8	471	53.1316	24.84
IPI00022774.3	Transitional endoplasmic reticulum ATPase	4.24473e+07	0	0	0	58.4834	12	17										806	89.2657	24.57
IPI00384444.6	Keratin, type I cytoskeletal 14	0	1.20616e+08	0	339505482				42.3603	10	15				10.6388	3	4	472	51.5294	24.36
IPI00884082.3	Glucose-6-phosphate 1-dehydrogenase	0	0	0	3.34111e+08										43.8796	11	15	509	58.2264	23.77
IPI00186290.6	Elongation factor 2	1.96558e+07	4.40787e+07	0	1.09864e+08	40.139	8	10	5.36527	2	2				14.4168	5	5	858	95.277	23.31
IPI00217871.4	Delta-1-pyrroline-5-carboxylate dehydrogenase, mitochondrial	0	1.382e+08	0	1.21814e+08				36.8891	10	11				6.22335	2	2	563	61.6806	23.09
IPI01012747.1	Uncharacterized protein	0	0	1.12875e+07	3.95041e+08							5.98	2	2	30.8207	9	10	447	48.2797	23.04
IPI00304596.3	Non-POU domain-containing octamer-binding protein	0	1.51084e+08	0	0				41.4767	8	14							471	54.1973	22.51
IPI00006713.1	DnaJ homolog subfamily C member 3	0	0	0	2.8461e+08										33.7838	8	10	504	57.5442	22.22
IPI00217963.3	Keratin, type I cytoskeletal 16	0	1.06608e+08	0	491645629				39.1199	9	14				7.40351	2	3	473	51.2362	22.2
IPI00026530.4	Protein ERGIC-53	0	0	4.02341e+07	6.09693e+08							12.1095	4	4	46.3346	9	13	510	57.513	22.16
IPI00981169.1	T-complex protein 1 subunit beta isoform 2	0	0	0	1.51076e+08										29.5266	7	8	488	52.6846	21.93
IPI00607732.1	Isoform 2 of Nicalin	0	6.95615e+07	0	0				26.8755	8	8							562	62.8065	20.64
IPI01011344.1	Uncharacterized protein	0	1.22364e+08	0	2.52267e+08				15.1094	4	5				11.2198	4	4	333	37.3826	20.42
IPI00011126.6	26S protease regulatory subunit 4	0	9.4721e+07	0	5.59655e+07				22.6658	6	6				11.7136	3	3	440	49.1537	20.23
IPI00291510.3	Inosine-5'-monophosphate dehydrogenase 2	0	0	0	3.45726e+08										37.4426	7	10	514	55.7696	20.23
IPI01025305.1	Uncharacterized protein	0	0	0	8.33599e+07										9.8762	4	4	225	23.8028	20
IPI00299402.1	Pyruvate carboxylase, mitochondrial	2.81815e+07	9.61785e+07	1.93338e+07	5.06699e+07	34.9345	8	10	26.6585	6	7	8.89623	3	3	20.3875	6	6	1178	129.551	19.78
IPI00220637.5	Seryl-tRNA synthetase, cytoplasmic	0	116011761	0	7.44952e+07				30.827	8	9				5.35575	2	2	514	58.7401	19.26
IPI01021659.1	23 kDa protein	0	3.13e+07	0	0				9.22254	3	3							198	23.4028	19.19
IPI00941747.1	Calnexin	4.25396e+07	0	0	0	25.5616	5	7										592	67.5259	18.75
IPI00001441.3	Isoform A of Formimidoyltransferase-cyclodeaminase	0	5.85056e+07	0	9.15347e+07				16.3199	6	6				20.4613	6	7	541	58.8894	18.48
IPI00020599.1	Calreticulin	0	7.79402e+07	1.28169e+07	9.28902e+07				24.9769	4	7	5.1899	2	2	10.1971	3	3	417	48.1118	17.99
IPI00796116.3	Uncharacterized protein	0	0	0	1.40953e+08										14.1886	5	5	372	41.6214	17.2
IPI01012403.1	cDNA, FLJ79105, highly similar to Phosphoenolpyruvate carboxykinase (GTP), mitochondrial	0	6.46532e+07	0	5.61657e+07				20.8827	5	6				10.2132	3	3	506	55.917	17
IPI00332828.1	cocaine esterase isoform 1	0	2.18894e+08	0	0				36.6401	8	12							623	68.8548	16.21
IPI00921588.1	dimethylaniline monooxygenase [N-oxide-forming] 5 isoform 2	0	6.71858e+07	0	1.92776e+08				10.2524	3	3				25.1776	6	8	464	52.443	14.66
IPI00651677.1	Isoform 2 of Probable ATP-dependent RNA helicase DDX17	0	1.50787e+08	1.93e+07	3.81794e+08				14.13	4	5	11.1258	2	4	20.1201	7	7	652	72.4961	14.42
IPI00336016.3	Probable cysteinyl-tRNA synthetase, mitochondrial	0	4.29346e+07	1.70382e+07	3.06991e+08				5.44864	2	2	7.5727	2	3	20.1463	7	7	564	62.1847	14.36
IPI00925437.1	Protein	1.10354e+06	0	0	0	7.07	2	2										203	22.4275	14.29
IPI00909681.1	Serine hydroxymethyltransferase	0	4.68847e+07	0	1.44312e+08				8.30845	3	3				16.9578	6	6	430	47.8137	14.19
IPI00166395.5	Isoform 1 of Acyl-CoA synthetase family member 3, mitochondrial	0	9.63522e+07	0	1.24143e+08				18.727	6	6				6.3504	2	2	576	64.0893	14.06
IPI00883598.3	Uncharacterized protein	0	5.20202e+07	0	8.88554e+07				9.81447	3	3				9.27566	3	3	494	53.533	13.97
IPI00296645.5	Microsomal triglyceride transfer protein large subunit	2.83065e+07	0	0	0	28.3662	9	9										894	99.2888	13.87
IPI00941463.1	Nucleosome assembly protein 1-like 4	0	6.68664e+07	0	7.44994e+07				12.8846	4	4				6.95068	2	2	375	42.7969	13.87
IPI00984387.1	cDNA FLJ53166, highly similar to Dihydropyrimidinase-related protein 2	0	5.20719e+07	0	0				12.7069	4	4							536	58.1264	13.43
IPI00916535.1	prolyl 4-hydroxylase subunit alpha-1 isoform 3 precursor	0	6.32744e+07	0	0				17.3321	5	5							516	58.921	13.18
IPI00027230.3	Endoplasmin	2.50721e+06	6.14245e+07	0	0	11.9479	4	4	33.8519	3	10							803	92.4113	12.95
IPI00028229.6	UDP-glucuronosyltransferase 2A3	0	0	0	53544950										14.2451	5	5	527	60.215	12.71
IPI00001639.2	Importin subunit beta-1	1.03816e+07	0	0	0	28.8086	7	8										876	97.108	12.56
IPI00965269.1	cDNA, FLJ79275, highly similar to T-complex protein 1 subunit epsilon	0	1.89718e+07	0	5.76377e+07				10.6496	3	3				5.24232	2	2	503	55.3136	12.52
IPI00927191.2	Isoform 3 of Beta-galactosidase	0	1.41522e+08	0	0				20.9236	6	7							647	72.7045	12.36
IPI00953696.1	glutathione reductase, mitochondrial isoform 4 precursor	0	0	0	9.9116e+07										11.4176	4	4	440	47.2372	12.27
IPI00916188.1	32 kDa protein	0	3.71687e+07	0	0				9.00229	3	3							297	32.4271	12.12
IPI01012526.1	Uncharacterized protein	0	7.98595e+07	4.1047e+06	8.33505e+07				24.8997	6	7	11.6665	2	3	8.15419	2	2	847	96.1558	11.92
IPI00943173.1	Coronin-1C	0	4.55272e+07	0	0				12.3631	4	4							474	53.2151	11.81
IPI00006510.1	Tubulin beta-1 chain	0	0	0	2.02958e+08										13.0447	4	5	451	50.2946	10.86
IPI01015738.1	Uncharacterized protein	1.44026e+06	2.56865e+07	0	0	9.96191	3	3	8.96547	3	3							692	79.8635	10.55
IPI00333619.4	Isoform 1 of Fatty aldehyde dehydrogenase	0	0	0	9.8579e+07										15.965	4	5	485	54.8129	10.52
IPI00001593.1	Lysosomal Pro-X carboxypeptidase	0	0	0	8.73079e+07										11.695	4	4	496	55.7639	10.48
IPI00554786.5	Isoform 5 of Thioredoxin reductase 1, cytoplasmic	0	6.25679e+07	0	0				18.6722	4	5							499	54.6719	10.42
IPI00002214.1	Importin subunit alpha-2	0	0	0	1.46616e+08										18.1599	4	5	529	57.8259	10.02
IPI00966751.1	CaM kinase II isoform	0	0	0	7.5404e+07										12.0932	5	5	610	67.8374	9.84
IPI00012074.3	Isoform 1 of Heterogeneous nuclear ribonucleoprotein R	3.20368e+06	5.13923e+07	0	5.59773e+07	7.18232	2	2	8.30358	3	3				8.86356	3	3	633	70.8993	9.64
IPI00465044.2	Protein RCC2	0	6.1975e+07	0	0				10.6493	4	4							522	56.0492	9
IPI00414696.1	Isoform A2 of Heterogeneous nuclear ribonucleoproteins A2/B1	0	0	0	51269317										5.98789	2	2	341	35.9839	8.8
IPI00029534.1	Amidophosphoribosyltransferase	0	4.92565e+07	0	0				8.34876	3	3							517	57.3624	8.7
IPI00915274.1	H/ACA ribonucleoprotein complex subunit 4 isoform 2	0	1.71404e+07	0	0				9.25566	3	3							509	56.9965	8.64
IPI00936002.1	Isoform 2 of Alpha-aminoadipic semialdehyde dehydrogenase	0	0	0	8.40643e+07										9.52273	3	3	511	55.3315	8.61
IPI00551024.5	Bifunctional ATP-dependent dihydroxyacetone kinase/FAD-AMP lyase (cyclizing)	0	3.706e+07	0	0				10.3156	3	3							575	58.91	8.52
IPI00026781.3	Fatty acid synthase	6.60997e+06	3.55539e+07	0	3.39266e+07	22.1336	6	6	19.6661	6	6				6.29474	2	2	2511	273.254	8.04
IPI00027834.3	Heterogeneous nuclear ribonucleoprotein L	0	4.47342e+07	0	0				9.3361	3	3							589	64.0924	7.98
IPI00895869.1	Isoform 2 of Propionyl-CoA carboxylase alpha chain, mitochondrial	0	4.0337e+07	0	0				12.0851	4	4							702	76.9986	7.98
IPI00793942.4	serine/threonine-protein phosphatase 5 isoform 2	0	4.01723e+07	0	0				10.3776	3	3							477	54.3908	7.97
IPI00029764.1	Splicing factor 3A subunit 3	0	3.21089e+07	0	0				7.06209	2	2							501	58.8123	7.78
IPI00218547.1	Isoform Short of Delta-1-pyrroline-5-carboxylate synthase	0	4.98755e+07	0	1.09998e+08				6.63702	2	2				15.7403	4	5	793	87.0344	7.69
IPI00922928.2	Uncharacterized protein	0	0	0	1.84075e+08										6.54556	2	2	300	34.5302	7.67
IPI00795694.1	Isoform 2 of Acyl-CoA synthetase short-chain family member 3, mitochondrial	0	1.61377e+07	0	0				5.53293	2	2							368	40.3006	7.61
IPI00922694.2	Uncharacterized protein	0	3.14004e+07	0	0				11.8848	4	4							632	69.8831	7.44
IPI00007812.1	V-type proton ATPase subunit B, brain isoform	0	0	0	9.28273e+07										8.93282	3	3	511	56.4649	7.44
IPI00019988.1	N-sulphoglucosamine sulphohydrolase	0	2.81577e+07	0	0				10.6001	3	4							502	56.6595	7.37
IPI00004358.4	Glycogen phosphorylase, brain form	5.86304e+06	0	0	0	15.5407	5	5										843	96.6345	7.24
IPI01011335.1	cDNA FLJ60435, highly similar to Heterogeneous nuclear ribonucleoprotein M	0	3.62277e+07	0	0				5.95685	2	2							366	39.1609	6.83
IPI00254338.2	Protein FAM134C	0	0	0	3.87819e+07										5.87156	2	2	466	51.3637	6.44
IPI00642416.1	60 kDa SS-A/Ro ribonucleoprotein isoform 4	0	3.52488e+07	0	0				7.94836	3	3							518	58.4452	6.37
IPI00909829.1	Pyruvate kinase	0	8.15473e+06	0	0				7.33306	2	2							488	52.5846	6.15
IPI00514894.2	Uncharacterized protein	0	2.23752e+07	0	0				5.72594	2	2							344	38.4589	6.1
IPI00032220.3	Angiotensinogen	0	0	0	1.00805e+08										7.59351	2	2	485	53.1205	5.98
IPI00017297.1	Matrin-3	0	3.20306e+07	0	0				10.1842	3	3							847	94.5648	5.9
IPI00943894.1	glycogen phosphorylase, liver form isoform 2	3.8462e+06	0	0	0	10.3867	3	3										813	93.0751	5.66
IPI00909657.1	cDNA FLJ50378, highly similar to Phenylalanyl-tRNA synthetase alpha chain	0	3.19183e+07	0	0				7.60144	2	2							477	54.1238	5.66
IPI00155054.3	cDNA FLJ50635, highly similar to ATP-dependent RNA helicase DDX19A	0	3.06847e+07	0	0				6.87484	2	2							447	50.402	5.59
IPI00022648.2	Eukaryotic translation initiation factor 5	0	0	0	3.54509e+07										6.74614	2	2	431	49.1918	5.57
IPI00099463.2	Sphingosine-1-phosphate lyase 1	0	4.31705e+07	0	1.5889e+08				6.02333	2	2				5.95112	2	2	568	63.4827	5.46
IPI00873788.2	Uncharacterized protein	0	0	0	3.03933e+07										5.54858	2	2	371	42.764	5.39
IPI00218435.1	Isoform 2 of U4/U6 small nuclear ribonucleoprotein Prp4	0	3.08398e+07	0	0				6.02039	2	2							521	58.2843	5.37
IPI00921488.1	Isoform 4 of COP9 signalosome complex subunit 1	0	0	0	9.20841e+07										5.68207	2	2	487	55.0579	5.34
IPI01013280.1	cDNA FLJ54090, highly similar to 4F2 cell-surface antigen heavy chain	3.00442e+06	0	0	0	5.4706	2	2										511	55.9047	5.09
IPI00641873.1	Uncharacterized protein	0	6.28109e+06	0	1.09552e+07				6.58945	2	2				6.56072	2	2	494	54.6745	5.06
IPI00644079.4	cDNA FLJ44920 fis, clone BRAMY3011501, highly similar to Heterogeneous nuclear ribonucleoprotein U	0	0	0	9.39993e+07										8.45237	2	2	750	83.033	4.93
IPI00910365.1	cDNA FLJ53237, highly similar to Caseinolytic peptidase B protein	0	5.64655e+07	0	0				8.07755	3	3							662	74.4424	4.83
IPI00165261.6	Sec1 family domain-containing protein 1	0	3.32835e+07	0	0				9.24569	2	3							642	72.3341	4.67
IPI01011575.2	Uncharacterized protein	0	0	0	2.00578e+07										13.064	3	4	1087	123.196	4.6
IPI00788953.3	band 4.1-like protein 2 isoform b	0	0	0	1.12945e+07										8.04269	2	3	673	76.0062	4.31
IPI00383680.3	dolichyl-diphosphooligosaccharide--protein glycosyltransferase subunit 2 isoform 2 precursor	0	2.49503e+07	0	0				6.54475	2	2							615	67.6814	4.23
IPI00031661.1	Nucleolar complex protein 4 homolog	0	3.17686e+07	0	0				5.32978	2	2							516	58.4307	3.88
IPI00397801.4	Filaggrin-2	0	4.93026e+06	0	0				13.1963	3	3							2391	247.928	3.6
IPI00414676.6	Heat shock protein HSP 90-beta	2.57371e+06	0	0	0	6.47651	2	2										724	83.2121	3.59
IPI00985384.1	ATP-dependent RNA helicase DDX3X isoform 3	0	2.43923e+07	0	0				6.11474	2	2							646	71.3109	3.56
IPI00924935.1	cDNA FLJ57106, highly similar to Transferrin receptor protein 1	3.11415e+06	0	0	0	5.96386	2	2										679	75.9166	3.24
IPI00398625.5	Hornerin	0	0	0	9.40147e+06										5.93235	2	2	2850	282.228	2.81
IPI00619903.3	Isoform 2 of UDP-glucose:glycoprotein glucosyltransferase 1	4.44161e+06	0	0	0	6.77941	2	2										1531	174.867	2.55

## Sheet: ACVL1 ->ALDH1A1, ALDH2, ALDH1B1
		Area				Control (1)			Control (2)			ACVL1 (1)			ACVL1 (2)			General information
Accession	Description	Control (1)	Control (2)	ACVL1 (1)	ACVL1 (2)	Score A2	# Peptides A2	# PSM A2	Score B2	# Peptides B2	# PSM B2	Score C2	# Peptides C2	# PSM C2	Score D2	# Peptides D2	# PSM D2	# AAs	MW [kDa]	ΣCoverage
IPI01019113.1;7106439	Tubulin beta chain	4.46363e+08	5.68166e+08	5.09393e+09	5.7555e+07	97.8704	14	27	231.469	19	66	256.516	23	70	61.4846	11	19	444	49.639	71.17
IPI00007752.1;5174735	Tubulin beta-2C chain	4.7688e+08	5.68166e+08	5.05736e+09	6.36399e+07	111.658	15	30	234.769	19	68	256.156	23	71	76.2021	12	24	445	49.799	71.01
IPI00019359.4	Keratin, type I cytoskeletal 9	6.21866e+08	0	2.39742e+08	9.23824e+07	142.225	21	39				34.6277	9	9	68.3653	11	17	623	62.0268	69.82
IPI00025252.1	Protein disulfide-isomerase A3	4.41603e+09	0	4.68425e+08	1.37316e+07	328.938	32	96				49.3155	13	17	12.4822	5	5	505	56.7468	68.51
28949044	Chain A, Apo Form Of Human Mitochondrial Aldehyde Dehydrogenase	0	3.11725e+08	0	0				151.922	21	46							500	54.4105	63.8
IPI00218914.5;21361176	Retinal dehydrogenase 1	1.34094e+09	6.4029e+07	6.62986e+09	6.11402e+08	141.489	21	38	30.5531	8	9	253.809	25	80	114.229	18	37	501	54.827	63.07
IPI00006663.1;25777732	Aldehyde dehydrogenase, mitochondrial	4.90168e+08	3.11725e+08	1.57075e+10	1.54555e+09	107.142	17	31	148.6	20	45	916.372	28	284	315.718	22	97	517	56.3456	62.48
IPI00893541.1	14 kDa protein	4.38545e+09	0	4.09893e+08	0	48.0689	6	14				16.8072	4	6				123	13.5108	60.16
20151189	Chain A, Structure Of Human Glutamate Dehydrogenase-Apo Form	0	1.54663e+09	0	0				291.537	23	90							505	55.9734	59.41
IPI00789806.2;12643394	Isoform 2 of Cytosol aminopeptidase	1.5788e+09	1.33108e+08	1.68925e+09	0	39.5862	11	12	58.1741	13	19	117.506	21	35				488	52.7379	57.79
IPI00218343.4;14389309	Tubulin alpha-1C chain	2.57023e+09	6.58848e+08	5.14402e+09	2.30706e+08	171.848	16	54	120.418	15	35	173.538	17	55	70.1715	13	22	449	49.8635	56.12
IPI00789370.3;746436	serine hydroxymethyltransferase, mitochondrial isoform 3	2.39458e+08	2.85435e+08	4.83845e+09	0	25.1535	8	8	102.671	13	32	173.392	14	52				483	53.4214	56.11
IPI00930688.1;135395	Tubulin alpha-1B chain	2.57023e+09	6.58848e+08	5.14402e+09	2.30706e+08	184.254	16	56	128.57	16	36	176.515	17	55	73.6018	13	23	451	50.1196	55.88
IPI00016801.1;4885281	Glutamate dehydrogenase 1, mitochondrial	736632260	1.54663e+09	7.86964e+09	9.01271e+07	106.716	17	31	285.629	22	88	307.37	25	95	56.3844	11	20	558	61.3592	54.84
IPI00936002.1;4557343	Isoform 2 of Alpha-aminoadipic semialdehyde dehydrogenase	3.36797e+08	1.32118e+08	1.64517e+09	0	49.1888	12	14	41.986	10	12	101.11	16	28				511	55.3315	54.21
IPI00220327.4	Keratin, type II cytoskeletal 1	1.78616e+09	0	1.13192e+09	1.55952e+08	181.403	22	49				108.017	21	33	82.4637	15	24	644	65.999	53.73
IPI00152432.2;19263340	Isoform 1 of Alanine aminotransferase 2	4.04752e+08	6.20285e+07	5.43034e+08	3.76419e+07	95.9026	17	28	42.1678	8	13	66.0344	14	20	32.3713	8	11	523	57.8664	52.96
IPI00216951.2;20178330	Aspartyl-tRNA synthetase, cytoplasmic	3.4502e+07	7.70471e+07	1.13518e+09	0	5.08321	2	2	35.8453	9	12	79.4554	19	26				501	57.1	52.69
IPI00009865.4	Keratin, type I cytoskeletal 10	3.03487e+09	0	1.72702e+09	1.56282e+08	198.813	24	55				103.132	24	31	81.0429	13	24	584	58.7917	51.71
IPI00007247.4	Propionyl-CoA carboxylase beta chain, mitochondrial	5.61145e+08	0	2.37335e+08	0	102.773	20	32				40.0297	11	12				539	58.1788	51.39
IPI00021304.1;4557703	Keratin, type II cytoskeletal 2 epidermal	1.33393e+09	1.48673e+08	8.98553e+08	1.01999e+08	114.936	21	32	39.8424	9	12	71.0939	17	20	55.72	10	16	645	65.8254	50.85
IPI00297779.7;5453603	T-complex protein 1 subunit beta	4.38694e+08	1.12343e+08	1.38225e+09	6.17839e+07	86.7534	15	24	78.3812	13	21	159.449	21	39	30.9871	7	10	535	57.4521	50.65
IPI00384280.5	Prenylcysteine oxidase 1	1.03609e+09	0	2.73262e+08	1.29645e+07	105.592	15	35				29.3044	7	9	4.28461	2	2	505	56.6037	47.92
IPI00031420.3	UDP-glucose 6-dehydrogenase	4.49339e+08	0	8.60142e+07	0	70.0403	18	23				8.88306	3	3				494	54.9893	46.56
IPI00019888.1;4507229	Succinate-semialdehyde dehydrogenase, mitochondrial	3.75124e+08	8.36149e+07	7.12588e+08	7.64168e+07	44.7708	10	14	42.4703	8	13	52.9873	12	16	22.6062	5	7	535	57.1783	45.05
IPI00103467.5	Aldehyde dehydrogenase X, mitochondrial	4.26812e+08	0	1.70068e+10	4.41331e+08	90.1997	12	25				989.577	23	294	86.911	10	25	517	57.1702	44.87
IPI00784154.1;31542947	60 kDa heat shock protein, mitochondrial	1.82535e+08	3.2398e+07	2.12235e+08	0	40.2869	9	11	43.3776	7	13	18.4537	7	7				573	61.0164	42.93
IPI00013683.2;20455526	Tubulin beta-3 chain	4.46363e+08	5.58489e+08	5.04696e+09	53663967	75.9783	12	22	123.715	10	36	155.405	17	44	36.3879	7	12	450	50.4003	40.67
IPI00010796.1;20070125	Protein disulfide-isomerase	4.79597e+08	1.12895e+07	5.48085e+07	0	85.8325	16	26	8.46834	2	3	10.575	4	4				508	57.0807	40.16
IPI00440493.2;4757810	ATP synthase subunit alpha, mitochondrial	5.23981e+07	1.75866e+08	1.26334e+09	9.82311e+06	10.5362	4	4	71.4474	11	20	74.5278	13	21	6.30213	2	2	553	59.7136	40.14
21961605	keratin 10 (epidermolytic hyperkeratosis; keratosis palmaris et plantaris) [Homo sapiens]	0	1.61606e+08	0	0				85.9431	17	26							584	58.7916	40.07
IPI00179964.5;14165466	Isoform 1 of Polypyrimidine tract-binding protein 1	6.00699e+08	6.98359e+07	7.28113e+08	1.85438e+07	63.2021	10	17	43.224	8	12	38.3818	8	12	9.2258	2	3	531	57.1856	38.98
IPI00011200.5;23308577	D-3-phosphoglycerate dehydrogenase	9.62017e+08	3.88521e+07	3.69924e+08	4.09137e+07	101.032	16	29	20.8531	7	7	28.8969	7	8	30.8343	9	10	533	56.6144	37.52
IPI00295400.1	Isoform 1 of Tryptophanyl-tRNA synthetase, cytoplasmic	1.44823e+08	0	5.71567e+07	0	35.4897	9	10				10.3197	2	3				471	53.1316	36.94
IPI00289800.7;12653141	Isoform Short of Glucose-6-phosphate 1-dehydrogenase	3.2047e+08	8.27331e+06	2.04592e+08	0	47.3661	13	17	5.01216	2	2	33.2832	11	12				515	59.219	36.12
IPI00024990.6;11095441	Methylmalonate-semialdehyde dehydrogenase [acylating], mitochondrial	4.88624e+08	2.03079e+07	1.24817e+08	3.26039e+07	73.2759	14	24	11.9651	4	5	13.6565	4	4	25.618	8	9	535	57.8027	35.89
IPI00514561.1	cDNA FLJ54552, highly similar to Heterogeneous nuclear ribonucleoprotein K	2.84522e+08	0	0	0	56.7638	11	15										428	47.5276	35.75
4502643;IPI00027626.3	chaperonin containing TCP1, subunit 6A (zeta 1); chaperonin containing T-complex subunit 6 [Homo sapiens]	0	2.79166e+07	3.41661e+08	0				15.0764	5	5	41.9991	10	13				531	57.9876	35.59
IPI00004968.1	Pre-mRNA-processing factor 19	3.32497e+08	0	0	0	44.3298	11	12										504	55.1463	35.12
IPI00759575.1;10835189	Isoform Cytoplasmic of Glutathione reductase, mitochondrial	3.34786e+08	1.28834e+08	1.17142e+09	4.95918e+07	38.5664	8	10	33.851	7	11	55.579	10	17	11.4886	3	4	479	51.6674	34.86
IPI00300725.7;5031839	Keratin, type II cytoskeletal 6A	2.05596e+08	3.12879e+07	5.78383e+08	0	51.4456	15	16	7.55466	2	2	43.8475	12	14				564	60.0083	34.57
IPI00026530.4;5031873	Protein ERGIC-53	8.14709e+08	1.08407e+08	8.553e+08	6.72318e+07	87.9914	13	23	20.7344	5	6	59.6049	11	15	17.2354	4	5	510	57.513	33.92
IPI00647280.2	Uncharacterized protein	4.26427e+07	0	2.44472e+08	0	4.92801	2	2				18.1976	6	6				257	29.335	30.74
IPI00963899.3	cDNA FLJ38173 fis, clone FCBBF1000053, highly similar to HYDROXYMETHYLGLUTARYL-COA SYNTHASE, CYTOPLASMIC	7.31942e+08	0	1.05532e+08	0	63.5894	13	18				5.44335	2	2				509	56.2029	30.65
IPI00965713.3	fibrinogen beta chain isoform 2 preproprotein	1.76233e+08	0	0	0	36.7601	10	10										432	49.9232	30.09
IPI00009867.3	Keratin, type II cytoskeletal 5	3.6374e+08	0	4.70798e+08	2.53294e+07	42.3577	12	15				28.7947	8	10	6.62487	2	3	590	62.34	30
105247	aldehyde dehydrogenase (NAD) (EC 1.2.1.3) 5 precursor, mitochondrial - human	0	2.45087e+08	0	0				77.0047	12	22							517	57.2732	29.98
IPI00215687.1	Isoform 3 of Glutaminase kidney isoform, mitochondrial	2.48347e+08	0	0	0	51.4781	11	14										598	65.4179	29.1
23396498;IPI00177728.3	Cytosolic nonspecific dipeptidase (Glutamate carboxypeptidase-like protein 1)	0	4.0628e+07	5.41743e+08	0				18.4775	5	6	58.6632	10	18				475	52.8449	28.84
IPI00783118.2	5'-nucleotidase domain-containing protein 2 isoform 1	1.97151e+08	0	9.72465e+07	0	40.297	10	12				11.5183	4	4				557	64.1033	28.73
IPI00910738.1	cDNA FLJ60647, highly similar to Keratin, type II cytoskeletal 6B	2.05596e+08	0	3.00012e+08	0	40.4037	11	12				32.2717	10	10				526	55.6981	28.71
IPI00030320.4;7428323	Probable ATP-dependent RNA helicase DDX6	4.50419e+07	6.29872e+07	4.60292e+08	6.28544e+06	20.3015	3	5	40.9318	8	12	46.5056	9	13	14.5296	2	4	483	54.3823	28.36
IPI00908881.3	Glucose-6-phosphate isomerase	8.66945e+08	0	73818288	0	85.2969	9	25				5.01967	2	2				531	59.9526	27.68
17318569	keratin 1; Keratin-1; cytokeratin 1; hair alpha protein [Homo sapiens]	0	1.81312e+08	0	0				90.876	16	27							644	66.027	27.48
IPI00291510.3	Inosine-5'-monophosphate dehydrogenase 2	1.57237e+08	0	0	0	42.893	9	10										514	55.7696	26.46
IPI01012403.1	cDNA, FLJ79105, highly similar to Phosphoenolpyruvate carboxykinase (GTP), mitochondrial	6.35473e+07	0	9.00894e+07	0	22.091	7	7				16.5467	4	5				506	55.917	26.28
IPI00410017.1	Isoform 2 of Polyadenylate-binding protein 1	99084627	0	7.0759e+07	0	43.8981	11	14				10.5908	3	3				547	61.142	25.59
IPI00006713.1	DnaJ homolog subfamily C member 3	2.00586e+08	0	0	0	33.7554	9	10										504	57.5442	25.2
IPI00304596.3;1895081	Non-POU domain-containing octamer-binding protein	1.04189e+08	9.28195e+06	1.18011e+08	0	18.9459	6	6	6.77825	2	2	23.2262	4	8				471	54.1973	24.63
IPI01009563.1	Adenylyl cyclase-associated protein	2.27843e+08	0	0	0	23.0343	7	7										452	49.2774	24.56
IPI01025305.1	Uncharacterized protein	3.30463e+07	0	1.34976e+08	0	6.77604	2	2				11.301	4	4				225	23.8028	23.11
IPI00027424.3	Isoform 1 of Glycerol kinase	1.64036e+08	0	1.53045e+08	0	31.6783	10	11				19.1607	7	7				524	57.4521	23.09
IPI00465436.4;4557014	Catalase	1.43989e+08	2.04804e+07	250738394	0	22.0873	7	7	5.73847	2	2	27.6445	8	9				527	59.7188	22.96
IPI00947363.2	cDNA FLJ53366, highly similar to Probable ATP-dependent RNA helicase DDX5	2.57503e+08	0	3.90879e+08	0	24.065	8	8				25.4107	9	9				603	67.72	22.55
IPI00007812.1	V-type proton ATPase subunit B, brain isoform	1.16787e+08	0	7.2115e+07	0	22.1998	7	7				7.21276	3	3				511	56.4649	21.53
IPI00607693.2	liver carboxylesterase 1 isoform c precursor	1.02039e+08	0	0	0	36.4827	8	10										566	62.3531	21.38
IPI01013163.2	Uncharacterized protein	0	0	2.86222e+08	0							28.176	8	9				449	51.3954	21.38
IPI00333619.4	Isoform 1 of Fatty aldehyde dehydrogenase	0	0	8.18289e+08	1.3516e+07							45.6196	9	15	5.90232	2	2	485	54.8129	21.24
IPI00395676.1;20178344	Isoform 2 of UTP--glucose-1-phosphate uridylyltransferase	9.75076e+07	5.30532e+07	469786428	0	5.94767	2	2	15.3675	4	5	27.9481	5	8				497	55.6421	20.72
5031753;IPI00013881.6	heterogeneous nuclear ribonucleoprotein H1; heterogeneous nuclear ribonucleoprotein H [Homo sapiens]	0	1.10121e+07	1.5086e+08	0				6.73616	2	2	22.9179	5	6				449	49.1984	20.49
24308013;IPI00166749.3	mitochondrial matrix processing protease, alpha subunit; inositol polyphosphate-5-phosphatase, 72kDa [Homo sapiens]	0	2.80466e+07	1.91582e+08	0				18.7384	5	6	24.5934	5	7				525	58.2156	20
IPI00020599.1	Calreticulin	8.16341e+07	0	0	0	22.0963	4	6										417	48.1118	18.23
IPI00016703.2	Delta(24)-sterol reductase	2.28083e+08	0	8.85232e+08	0	12.2013	3	4				30.0357	7	9				516	60.062	17.05
IPI01011421.2	Dihydrolipoyl dehydrogenase	3.09761e+08	0	0	0	42.2559	5	11										459	48.8503	16.56
IPI01011344.1	Uncharacterized protein	1.91776e+08	0	2.42253e+08	0	6.90525	2	2				12.5522	4	4				333	37.3826	16.52
IPI00018873.1	Nicotinamide phosphoribosyltransferase	0	0	1.12523e+08	0							26.2615	6	7				491	55.4866	16.5
IPI00219005.3	Peptidyl-prolyl cis-trans isomerase FKBP4	7.21567e+07	0	0	0	14.9845	4	4										459	51.7721	16.12
IPI00910144.2	Uncharacterized protein	7.67622e+07	0	0	0	13.7468	5	5										478	52.4445	15.48
IPI00032220.3	Angiotensinogen	5.70208e+07	0	2.24615e+08	0	14.4817	4	4				22.3875	5	6				485	53.1205	15.05
IPI01015038.1	T-complex protein 1 subunit delta	1.07709e+08	0	0	0	22.3103	5	6										483	52.2979	14.91
IPI00651677.1	Isoform 2 of Probable ATP-dependent RNA helicase DDX17	2.24122e+08	0	6.22587e+08	0	16.8713	6	6				17.8849	6	6				652	72.4961	14.26
IPI00910614.1	heterogeneous nuclear ribonucleoprotein R isoform 4	6.88254e+07	0	0	0	17.1587	6	6										532	59.6447	13.91
IPI00027851.2	cDNA FLJ53927, highly similar to Beta-hexosaminidase alpha chain	2.93288e+07	0	2.10814e+08	0	4.79697	2	2				23.3932	6	7				540	61.9739	13.89
IPI00465170.1	Isoform 1 of 5'-nucleotidase domain-containing protein 3	1.26631e+08	0	0	0	23.118	7	8										548	63.3791	13.87
25058989;IPI00384707.3	Similar to RIKEN cDNA 3230401I01 gene [Homo sapiens]	0	2.68805e+07	2.18865e+08	0				5.04611	2	2	15.9755	6	6				534	59.9212	13.86
IPI00412713.4	Sorting and assembly machinery component 50 homolog	6.21002e+07	0	1.32404e+08	0	15.9443	4	5				17.8366	4	5				469	51.9433	13.65
IPI00910754.1	L-lactate dehydrogenase A chain isoform 2	0	0	3.06879e+07	0							8.33404	3	3				274	30.1858	13.5
IPI00796823.1	Uncharacterized protein	0	0	3.52143e+08	0							8.50037	2	3				230	25.6592	13.48
IPI00384444.6	Keratin, type I cytoskeletal 14	4.55039e+07	0	2.52238e+08	0	11.402	4	4				11.0873	3	4				472	51.5294	13.35
IPI01010266.1	cDNA FLJ57237, highly similar to FK506-binding protein 5	0	0	2.38874e+07	0							8.18594	3	3				278	31.5847	12.95
IPI00028229.6	UDP-glucuronosyltransferase 2A3	6.82097e+07	0	1.24704e+08	0	9.31366	3	3				18.7776	5	6				527	60.215	12.71
IPI00299402.1;1709947	Pyruvate carboxylase, mitochondrial	5.90945e+07	5.33766e+07	2.57221e+07	0	14.1413	4	4	33.3197	8	10	6.61875	2	2				1178	129.551	12.22
IPI01021250.1	Protein	0	0	2.50627e+08	0							8.30965	3	3				362	38.2249	12.15
IPI00883950.1	Similar to cytoskeleton-associated protein 4 (Fragment)	8.49656e+07	0	0	0	16.2115	5	5										560	62.023	12.14
IPI00952607.1	T-complex protein 1 subunit eta isoform d	1.06832e+08	0	0	0	17.7116	4	5										499	54.7695	12.02
IPI00218547.1	Isoform Short of Delta-1-pyrroline-5-carboxylate synthase	8.71443e+07	0	0	0	25.1265	7	8										793	87.0344	11.98
19923748;IPI00420108.6	dihydrolipoamide S-succinyltransferase (E2 component of 2-oxo-glutarate complex) [Homo sapiens]	0	4.07439e+07	242974058	0				8.48434	3	3	9.24929	2	2				453	48.7245	11.92
IPI00029784.3	UDP-glucuronosyltransferase 2B7	0	0	1.07385e+08	0							18.7645	5	6				529	60.655	11.91
IPI00909399.2	xaa-Pro dipeptidase isoform 3	1.15802e+08	0	0	0	12.1436	4	4										429	47.2304	11.89
IPI00789428.1	Isoform 2 of Methylcrotonoyl-CoA carboxylase beta chain, mitochondrial	52482503	0	0	0	14.2736	4	4										525	57.4824	10.67
IPI00217871.4	Delta-1-pyrroline-5-carboxylate dehydrogenase, mitochondrial	4.48489e+07	0	1.2367e+08	0	8.3861	3	3				9.72103	3	3				563	61.6806	10.66
IPI00788942.1	Isoform 2 of RuvB-like 1	0	0	8.89589e+07	0							8.39734	3	3				386	42.1	10.62
IPI00027230.3	Endoplasmin	6.65644e+07	0	1.18853e+08	0	12.0785	4	4				10.521	4	4				803	92.4113	10.59
IPI00022648.2	Eukaryotic translation initiation factor 5	6.8833e+07	0	6.42861e+07	0	11.0048	4	4				6.35277	2	2				431	49.1918	10.44
IPI01013559.1	cDNA FLJ58502, highly similar to Protein disulfide-isomerase A6	0	0	2.32828e+08	0							11.3848	3	4				437	47.8081	10.3
IPI01015222.1	cDNA FLJ54259, highly similar to Smu-1 suppressor of mec-8 and unc-52 protein homolog	4.58244e+07	0	1.0144e+08	0	5.8245	2	2				9.0105	3	3				352	39.3177	10.23
IPI00336016.3	Probable cysteinyl-tRNA synthetase, mitochondrial	1.37235e+08	0	0	0	14.27	5	5										564	62.1847	9.93
IPI01014810.1	cDNA FLJ53504, highly similar to Xylulose kinase	0	0	8.62721e+07	0							6.70551	2	2				399	43.1544	9.77
IPI00005745.1	Serine palmitoyltransferase 1	0	0	9.99102e+07	0							8.923	3	3				473	52.7105	9.73
IPI00002214.1	Importin subunit alpha-2	6.0306e+07	0	0	0	10.7701	3	3										529	57.8259	9.45
IPI00554648.3	Keratin, type II cytoskeletal 8	0	0	4.43082e+08	0							16.4005	4	6				483	53.6711	9.32
IPI00006510.1;13562114	Tubulin beta-1 chain	2.68888e+08	4.94573e+08	2.75532e+09	5.49008e+07	13.4742	3	5	22.6002	2	8	27.8275	4	9	16.4829	2	6	451	50.2946	9.31
IPI00747810.3	52 kDa protein	0	0	123093886	0							11.7129	3	3				472	52.2299	9.11
IPI00941463.1	Nucleosome assembly protein 1-like 4	3.56407e+07	0	0	0	6.6081	2	2										375	42.7969	8.53
IPI00980998.2	cDNA FLJ57232, highly similar to Lysosomal Pro-X carboxypeptidase	4.57829e+07	0	0	0	6.18135	2	2										391	43.9056	8.44
IPI00011126.6	26S protease regulatory subunit 4	1.83503e+07	0	0	0	9.66767	3	3										440	49.1537	8.18
IPI00186290.6;4503483	Elongation factor 2	4.274e+07	9.66503e+06	4.18257e+07	0	8.29443	3	3	5.5502	2	2	5.53123	2	2				858	95.277	8.04
IPI01018135.1	cDNA FLJ39696 fis, clone SMINT2011033, highly similar to Sorting and assembly machinery component 50 homolog	7.6736e+07	0	0	0	5.43788	2	2										274	30.1932	8.03
IPI00009532.5	cDNA FLJ56034, highly similar to 4-aminobutyrate aminotransferase, mitochondrial	8.42267e+06	0	1.6149e+07	0	8.99234	3	3				6.53149	2	2				515	58.1915	7.77
IPI00966657.1	Uncharacterized protein	2.81518e+07	0	0	0	7.11403	2	2										433	48.1297	7.39
IPI00983581.1	SYNCRIP protein (Fragment)	4.71439e+07	0	0	0	7.62672	3	3										453	50.6189	7.28
IPI00847896.1	Similar to Glutamate-rich WD repeat-containing protein 1	2.33803e+07	0	0	0	9.50615	2	2										445	49.2291	7.19
IPI00877802.2	Isoform 4 of Histone-binding protein RBBP4	0	0	1.98048e+08	0							7.6422	2	3				390	43.455	7.18
IPI00978544.1	52 kDa protein	0	0	3.30185e+07	0							7.46257	2	2				443	51.5368	6.55
IPI00254338.2	Protein FAM134C	2.14308e+07	0	0	0	5.68226	2	2										466	51.3637	6.44
IPI00383581.4	cDNA FLJ61290, highly similar to Neutral alpha-glucosidase AB	8.12462e+07	0	8.21919e+07	6.76679e+06	9.35586	3	3				6.94747	2	2	12.9097	2	3	995	112.855	5.53
IPI00099463.2	Sphingosine-1-phosphate lyase 1	7.63254e+07	0	0	0	6.17908	2	2										568	63.4827	5.46
IPI00847989.3	Pyruvate kinase	4.33346e+07	0	0	0	7.01651	2	2										458	49.9949	5.24
IPI00794673.2	cDNA FLJ59382, highly similar to T-complex protein 1 subunit theta	1.25471e+07	0	0	0	6.73331	2	2										475	51.5533	5.05
IPI00414676.6	Heat shock protein HSP 90-beta	6.14711e+07	0	0	0	8.13042	3	3										724	83.2121	4.83
IPI00289171.2	Cytochrome P450 4F12	2.55085e+07	0	0	0	5.30038	2	2										524	60.231	4.58
IPI01025877.1	49 kDa protein	0	0	3.96542e+07	0							4.60867	2	2				440	48.6385	4.55
IPI00984414.3	Uncharacterized protein	0	0	7.25141e+07	0							4.56567	2	2				426	46.3307	4.23
IPI00010740.1	Isoform Long of Splicing factor, proline- and glutamine-rich	0	0	1.14152e+08	0							6.53653	2	2				707	76.1016	3.82
IPI00922694.2	Uncharacterized protein	2.1554e+07	0	0	0	4.91919	2	2										632	69.8831	3.8
IPI01014861.1	Heterogeneous nuclear ribonucleoprotein M isoform a variant (Fragment)	0	0	6.9693e+07	0							5.8494	2	2				615	65.2112	3.74
IPI01015738.1	Uncharacterized protein	2.66644e+07	0	0	0	6.04347	2	2										692	79.8635	3.61
IPI00419920.2	cocaine esterase isoform 2	4.52366e+07	0	0	0	4.74732	2	2										607	67.0079	3.29
IPI00397801.4	Filaggrin-2	5.43798e+06	0	0	0	7.01581	2	2										2391	247.928	2.26
IPI00026781.3	Fatty acid synthase	1.81292e+07	0	40877589	0	9.02584	3	3				5.4491	2	2				2511	273.254	1.43
IPI00740057.4	Ankyrin repeat domain-containing protein 31	0	0	7.61514e+07	0							4.9929	2	2				1873	210.685	1.39
IPI00398625.5	Hornerin	0	0	6.81742e+06	0							7.18272	2	2				2850	282.228	0.81
IPI00853372.3	Isoform 7 of Uncharacterized protein KIAA1109	2.827e+08	0	0	0	4.88102	2	2										4251	470.633	0.59

## Sheet: ACVL2a -> ACAA2
		Area				Control (1)			Control (2)			ACVL2a (1)			ACVL2a (2)			General information
Accession	Description	Control (1)	Control (2)	ACVL2a (1)	ACVL2a (2)	Score A2	# Peptides A2	# PSM A2	Score B2	# Peptides B2	# PSM B2	Score C2	# Peptides C2	# PSM C2	Score D2	# Peptides D2	# PSM D2	# AAs	MW [kDa]	ΣCoverage
IPI00333838.1	Acyl-coenzyme A thioesterase 1	7.18172e+08	3.03764e+08	6.44489e+08	5.27544e+07	68.1577	12	20	125.661	20	39	105.269	13	29	34.7493	5	10	421	46.2481	65.32
IPI00021439.1	Actin, cytoplasmic 1	2.87375e+10	7.20733e+08	6.20031e+09	5.14161e+09	589.857	13	195	102.689	11	32	278.065	12	88	362.973	14	103	375	41.7097	64.27
IPI00220906.6	Isoform 1 of Acyl-coenzyme A thioesterase 2, mitochondrial	7.18172e+08	3.03764e+08	6.44489e+08	5.27544e+07	61.982	11	18	135.922	20	41	98.4152	12	27	34.7493	5	10	483	53.1847	61.49
IPI00001539.8	3-ketoacyl-CoA thiolase, mitochondrial	6.16291e+08	0	1.28552e+09	2.39996e+08	48.7727	11	13				126.664	12	33	100.557	14	26	397	41.8976	60.71
IPI00020944.1	Squalene synthase	7.19134e+08	1.50969e+08	5.81256e+08	1.59984e+08	44.959	10	14	71.3377	11	24	84.6875	14	26	73.9318	11	23	417	48.0842	56.35
IPI00019359.4	Keratin, type I cytoskeletal 9	7.55549e+08	1.14317e+08	4.05454e+08	2.43182e+07	72.6317	13	19	60.7073	11	17	82.4159	13	22	13.1698	3	3	623	62.0268	54.74
IPI00022334.1	Ornithine aminotransferase, mitochondrial	4.41137e+08	6.77635e+07	2.8806e+08	9.9503e+07	26.232	8	9	31.7197	8	11	49.1673	8	14	51.2171	11	16	439	48.5042	52.85
IPI00027107.5	elongation factor Tu, mitochondrial precursor	6.95556e+08	1.07026e+08	4.17655e+08	9.96783e+07	61.0497	13	18	53.1626	12	18	99.1418	15	31	50.9096	10	17	455	49.8433	50.11
IPI00021304.1	Keratin, type II cytoskeletal 2 epidermal	1.65068e+09	1.91181e+08	9.27693e+08	8.31005e+07	71.1722	14	21	71.6579	13	21	97.413	20	30	36.3863	8	11	645	65.8254	49.15
IPI00027223.2	Isocitrate dehydrogenase [NADP] cytoplasmic	2.99711e+09	2.31949e+08	9.01422e+08	8.27421e+08	109.661	15	32	83.3326	13	32	124.185	13	38	144.897	16	51	414	46.6295	49.03
IPI00220327.4	Keratin, type II cytoskeletal 1	2.11727e+09	2.65998e+08	1.23501e+09	1.12051e+08	123.991	21	35	112.621	16	32	153.263	21	43	52.1802	14	15	644	65.999	48.45
IPI00383539.5	Citrate synthase	2.59487e+09	2.50654e+08	9.24999e+08	388522363	37.5505	8	13	43.9822	8	17	40.3529	9	15	60.7216	12	23	453	50.3997	46.8
IPI00011107.2	Isocitrate dehydrogenase [NADP], mitochondrial	5.01661e+08	7.57275e+07	6.0896e+07	2.93587e+08	70.032	16	21	16.6013	5	6	43.4628	9	12	60.3186	14	20	452	50.8769	46.24
IPI01011912.1	Phosphoglycerate kinase	1.19288e+09	0	5.01543e+07	1.82027e+07	74.5905	12	20				10.3853	3	3	11.6473	3	4	389	41.4024	44.73
IPI00305383.1	Cytochrome b-c1 complex subunit 2, mitochondrial	5.13006e+08	5.19395e+07	2.46225e+08	1.05512e+08	55.9248	13	16	21.6195	5	7	64.8156	14	19	51.1033	10	15	453	48.4129	43.71
IPI00009865.4	Keratin, type I cytoskeletal 10	1.02734e+09	1.44392e+08	6.5655e+08	8.04473e+07	92.5539	17	26	71.7891	15	23	96.4189	16	30	54.2917	11	16	584	58.7917	42.98
IPI00012007.6	Adenosylhomocysteinase	1.85783e+09	1.86664e+08	1.09198e+09	4.57764e+08	86.5609	14	25	90.1165	17	30	108.175	15	33	132.794	17	43	432	47.6852	42.13
IPI00217223.1	Multifunctional protein ADE2	2.19976e+08	4.40305e+07	1.32791e+08	1.07401e+08	35.5584	8	10	31.7351	9	10	37.3124	10	12	63.1013	12	19	451	49.6476	40.58
IPI01014382.2	Uncharacterized protein	2.73928e+08	1.46408e+08	1.4719e+08	3.59895e+07	36.1665	9	10	65.1007	13	21	40.6812	10	12	15.1727	5	5	490	54.2526	39.59
IPI00745502.2	26S protease regulatory subunit 8 isoform 2	3.96778e+07	2.06158e+07	8.05648e+07	3.13562e+07	13.2923	4	4	9.34552	3	3	45.9267	12	16	18.1038	5	5	398	44.7557	39.45
IPI00217963.3	Keratin, type I cytoskeletal 16	3.50093e+08	2.28282e+07	3.18803e+08	0	37.7638	10	12	7.73051	3	3	66.3932	16	22				473	51.2362	38.48
IPI00005198.2	Interleukin enhancer-binding factor 2	1.34176e+09	1.13165e+08	4.03705e+08	3.45093e+08	71.6583	9	21	52.0652	8	17	66.357	9	19	74.614	10	23	390	43.0352	37.95
IPI00025491.1	Eukaryotic initiation factor 4A-I	0	1.70591e+08	1.90312e+07	0				108.015	15	36	7.58136	3	3				406	46.1246	37.68
IPI00290416.3	Isoform 1 of Obg-like ATPase 1	2.72494e+08	5.25541e+07	1.83715e+08	7.1247e+07	29.5011	6	9	31.5222	7	9	48.5571	10	14	49.6005	10	14	396	44.7153	36.62
IPI00396485.3	Elongation factor 1-alpha 1	372971514	2.13019e+08	1.61706e+08	1.1916e+08	11.4012	4	4	56.1118	8	18	18.0906	5	5	38.7597	8	12	462	50.1091	36.36
IPI00927101.1	Uncharacterized protein	4.72386e+08	0	0	0	30.0911	7	9										264	29.487	35.61
IPI00384444.6	Keratin, type I cytoskeletal 14	3.50093e+08	2.89627e+07	3.27834e+08	0	37.4417	11	12	13.6686	5	5	66.099	14	21				472	51.5294	34.75
IPI00099838.6	Isoform 1 of Lysophosphatidic acid phosphatase type 6	9.09884e+07	2.52971e+07	3.22885e+07	4.1595e+07	12.1478	4	4	8.70753	3	3	13.9234	5	5	23.4833	7	7	428	48.8228	33.41
IPI00021428.1	Actin, alpha skeletal muscle	1.27341e+10	2.75837e+08	3.71344e+09	2.94099e+09	375.033	7	131	41.2123	5	14	201.885	6	68	145.02	8	48	377	42.0239	32.89
IPI00955815.2	pyruvate dehydrogenase E1 component subunit alpha, somatic form, mitochondrial isoform 4 precursor	5.54114e+08	0	7.31406e+07	6.33734e+07	21.6129	6	7				16.5723	6	6	34.4576	8	11	359	40.1621	31.2
IPI00964648.1	30 kDa protein	9.82421e+08	1.73309e+08	6.95185e+08	1.30684e+08	26.9369	6	8	37.038	7	12	36.7748	7	11	17.2849	4	5	261	29.7056	30.65
IPI00908883.3	cDNA FLJ55002, highly similar to Alpha-centractin	1.21392e+08	2.81068e+07	1.43699e+08	3.1643e+07	12.0044	3	3	7.64885	2	2	31.9692	5	8	11.0691	3	3	334	38.2507	28.44
IPI00014151.3	26S proteasome non-ATPase regulatory subunit 6	2.00525e+08	0	0	0	35.0353	10	11										389	45.5023	28.02
IPI00908896.2	Uncharacterized protein	325799541	2.834e+07	1.08659e+08	40332642	23.3747	6	7	11.279	3	3	22.9651	5	7	17.9803	4	6	429	47.0574	27.74
IPI00946334.1	NADH dehydrogenase [ubiquinone] iron-sulfur protein 2, mitochondrial isoform 2 precursor	2.77087e+08	3.26601e+07	1.89491e+08	4.65006e+07	16.7081	5	6	25.5959	6	8	31.11	7	10	23.3419	6	7	457	51.8185	27.35
IPI00792499.1	Uncharacterized protein	156327709	1.26628e+08	2.94549e+08	9.81901e+07	19.7955	6	6	44.7954	7	12	50.8524	7	14	35.7539	8	10	616	68.2886	26.79
IPI00165092.3	Tyrosyl-tRNA synthetase, mitochondrial	1.31764e+08	0	1.86957e+07	4.34209e+07	22.7985	5	6				7.55294	2	2	26.7981	6	8	477	53.1657	26.42
IPI01015888.1	cDNA, FLJ78845, highly similar to Medium-chain specific acyl-CoA dehydrogenase, mitochondrial	3.85307e+08	0	4.85011e+07	3.20811e+07	17.5407	4	5				11.4855	4	4	18.4451	4	6	385	42.3995	26.23
IPI00797038.1	Isoform 1 of Phosphoenolpyruvate carboxykinase [GTP], mitochondrial	9.61511e+07	4.82153e+07	4.00661e+07	3.10903e+07	21.8899	7	7	25.3454	6	8	25.2264	8	8	9.29826	3	3	640	70.6846	25.47
IPI00096066.2	Succinyl-CoA ligase [GDP-forming] subunit beta, mitochondrial	265293955	0	3.462e+07	3.30542e+07	26.7678	7	8				9.36064	3	3	16.4879	5	5	432	46.4814	25.46
IPI01020686.1	Uncharacterized protein	0	1.91927e+07	3.68421e+07	0				8.39262	2	2	19.1018	6	6				435	48.4876	24.37
IPI00450768.7	Keratin, type I cytoskeletal 17	2.57221e+08	3.41089e+07	2.97576e+08	0	17.9148	5	6	6.67901	2	2	44.2931	10	14				432	48.076	23.38
IPI00401264.5	Endoplasmic reticulum resident protein 44	1.08954e+08	3.4212e+07	6.63893e+07	0	9.7095	3	3	25.3147	5	8	25.8063	7	7				406	46.9414	22.66
IPI00893170.1	Uncharacterized protein	7.55472e+07	0	0	0	8.65403	3	3										148	16.4487	22.3
IPI00552938.2	heterogeneous nuclear ribonucleoprotein G isoform 2	3.55544e+08	0	8.60562e+07	0	10.8786	4	4				5.99853	2	2				196	22.1574	21.94
IPI00909059.5	cDNA FLJ53910, highly similar to Keratin, type II cytoskeletal 6A	7.77603e+07	3.38139e+07	6.91878e+07	0	11.424	3	4	19.5164	5	6	34.1817	10	12				535	57.8032	21.87
IPI00956313.2	Uncharacterized protein	7.77603e+07	2.97122e+07	6.91878e+07	0	11.424	3	4	16.9183	4	5	34.2219	10	12				549	58.4325	21.31
IPI00007752.1	Tubulin beta-2C chain	0	1.91927e+07	3.64621e+07	0				8.39262	2	2	16.8176	5	5				445	49.799	21.12
IPI01022175.1	cDNA FLJ55805, highly similar to Keratin, type II cytoskeletal 4	0	0	5.59078e+07	0							28.919	9	9				474	51.7272	20.89
IPI01015077.1	cDNA FLJ51238, highly similar to Aldehyde dehydrogenase X, mitochondrial	0	0	0	3.63786e+07										9.13924	2	2	218	24.5723	20.64
IPI00971018.1	Isoform 1 of TAR DNA-binding protein 43	1.23388e+08	0	0	2.49988e+07	17.8673	5	6							7.15382	2	2	414	44.7113	20.53
IPI00894340.1	Uncharacterized protein	1.03429e+08	0	0	0	14.7093	4	4										321	36.9169	20.25
IPI00550746.4	Nuclear migration protein nudC	0	0	9.80104e+07	0							17.6315	6	6				331	38.2191	19.64
IPI00015285.7	Ethanolamine-phosphate cytidylyltransferase	0	2.98404e+07	0	0				22.415	6	8							389	43.8079	19.54
IPI00852780.1	Protein	2.49239e+07	0	0	0	9.52493	3	3										229	25.8157	19.21
IPI00790831.1	Uncharacterized protein	8.7258e+07	0	3.90774e+07	0	14.0782	5	5				18.3483	6	6				387	44.6157	18.6
IPI00554788.5	Keratin, type I cytoskeletal 18	4.4487e+08	0	7.84772e+07	0	21.9359	6	7				4.94883	2	2				430	48.0285	18.37
IPI00795694.1	Isoform 2 of Acyl-CoA synthetase short-chain family member 3, mitochondrial	9.15618e+07	0	0	0	15.4034	5	5										368	40.3006	18.21
IPI00220993.1	Isoform CNPI of 2',3'-cyclic-nucleotide 3'-phosphodiesterase	1.49464e+08	0	0	0	20.0316	7	7										401	45.0703	18.2
IPI00009867.3	Keratin, type II cytoskeletal 5	1.115e+08	5.15752e+07	8.09084e+07	0	11.4918	3	4	15.9583	4	6	34.7691	8	13				590	62.34	18.14
IPI00795303.2	cDNA FLJ50996, highly similar to 60S ribosomal protein L4	1.64142e+08	0	0	0	16.0313	5	5										414	45.9835	18.12
IPI00171196.2	Isoform 3 of Keratin, type I cytoskeletal 13	2.35937e+08	0	2.79477e+08	0	12.496	4	4				29.8785	8	10				420	45.8386	17.86
IPI00306576.1	Arylsulfatase B	1.24102e+08	4.18481e+07	0	0	13.9048	3	4	14.45	4	5							533	59.6494	17.82
IPI01010852.1	cDNA FLJ57121, highly similar to Heterogeneous nuclear ribonucleoprotein F	1.21929e+08	1.45794e+07	5.53427e+07	0	6.6008	2	2	7.98117	2	2	8.64296	2	3				338	37.2318	17.75
IPI00966528.1	Uncharacterized protein	1.31867e+08	0	1.07587e+08	4.26679e+07	6.49221	2	2				17.6023	4	5	11.8837	3	4	474	50.9543	17.72
IPI00643101.1	Isoform Cytoplasmic of Cysteine desulfurase, mitochondrial	0	3.48765e+07	0	0				14.5301	5	5							397	43.9894	17.63
IPI00218343.4	Tubulin alpha-1C chain	5.02967e+07	0	2.80049e+07	0	18.1987	4	5				5.24697	2	2				449	49.8635	17.15
IPI01012004.1	cDNA PSEC0175 fis, clone OVARC1000169, highly similar to Protein disulfide-isomerase A3	2.40888e+07	1.15511e+07	3.05139e+07	0	14.7054	4	5	5.21102	2	2	5.74889	2	2				480	54.0685	17.08
IPI00554660.1	Peroxisomal sarcosine oxidase	6.95048e+07	0	0	0	15.9576	5	5										390	44.0377	16.67
IPI00759806.1	Isoform MBP-1 of Alpha-enolase	4.53271e+07	0	2.26786e+07	0	14.5395	4	4				11.6273	3	3				341	36.9048	16.42
IPI00029469.1	Beta-centractin	0	0	9.68205e+07	0							15.2755	4	4				376	42.2667	15.96
IPI00031107.1	Isoform 2 of Hydroxysteroid dehydrogenase-like protein 2	0	2.38511e+07	0	0				17.0578	4	5							345	37.2962	15.65
IPI00939560.1	thioredoxin domain-containing protein 5 isoform 3	6.02526e+07	3.25142e+07	4.07627e+07	1.51105e+07	6.84346	2	2	11.234	2	3	15.996	4	5	6.43287	2	2	324	36.155	15.43
IPI00026215.1	Flap endonuclease 1	7.43427e+07	0	2.22294e+07	0	14.697	4	4				9.75125	3	3				380	42.5661	15.26
IPI00984352.1	Uncharacterized protein	5.82805e+07	0	0	0	15.7115	5	5										325	37.6848	15.08
IPI00410017.1	Isoform 2 of Polyadenylate-binding protein 1	0	9.41624e+06	4.23926e+07	0				4.55862	2	2	15.4029	5	5				547	61.142	14.99
IPI00012828.3	3-ketoacyl-CoA thiolase, peroxisomal	3.01495e+07	0	0	6.85689e+06	7.79512	2	2							6.70766	2	2	424	44.2639	14.62
IPI00976213.2	serum paraoxonase/arylesterase 2 isoform 2	0	0	0	2.67031e+07										8.37363	2	2	342	37.9566	14.04
IPI00058192.1	Isoform 1 of GDP-fucose protein O-fucosyltransferase 1	1.71613e+08	0	0	0	18.316	4	5										388	43.9272	13.66
IPI00985234.1	cDNA FLJ54799, highly similar to Mitochondrial 28S ribosomal protein S27	1.13561e+08	0	0	0	14.8851	4	5										358	41.3031	13.41
IPI00845432.1	Isoform 1 of NAD kinase domain-containing protein 1	1.59426e+08	0	0	0	14.4078	5	5										442	49.4022	13.12
IPI00924866.1	21 kDa protein	7.66304e+07	0	0	0	4.74052	2	2										187	21.2055	12.83
IPI01012504.1	6-phosphogluconate dehydrogenase, decarboxylating	0	3.79044e+06	1.63976e+07	0				6.72378	2	2	10.8974	3	3				470	51.8393	12.77
IPI00009896.1	Epoxide hydrolase 1	1.75215e+08	0	3.54172e+07	0	11.905	2	3				12.6729	4	4				455	52.915	12.31
IPI00290460.3	Eukaryotic translation initiation factor 3 subunit G	0	0	2.79952e+07	0							7.68213	2	2				320	35.5889	12.19
IPI00018206.4	Aspartate aminotransferase, mitochondrial	1.11249e+08	0	0	0	18.9486	4	5										430	47.4873	11.86
IPI00895869.1	Isoform 2 of Propionyl-CoA carboxylase alpha chain, mitochondrial	0	2.85208e+07	2.50093e+07	2.99211e+07				27.2543	5	9	7.7702	3	3	13.331	4	5	702	76.9986	11.82
IPI00162330.3	39S ribosomal protein L37, mitochondrial	2.34585e+08	0	0	0	10.3683	3	3										423	48.0871	11.58
IPI00306516.1	Mitochondrial import inner membrane translocase subunit TIM44	2.62311e+07	0	0	0	14.8896	5	5										452	51.3235	11.5
IPI01013559.1	cDNA FLJ58502, highly similar to Protein disulfide-isomerase A6	0	0	1.58298e+07	1.71766e+07							5.49305	2	2	7.14128	2	2	437	47.8081	11.44
IPI00651621.1	Isoform B of Histone acetyltransferase type B catalytic subunit	0	1.71796e+07	0	0				15.2594	3	5							334	39.7609	11.38
IPI00791053.2	aminoacylase-1 isoform b	5.92529e+07	0	0	0	5.56207	2	2										336	37.5728	11.31
IPI00966238.2	cDNA FLJ51907, highly similar to Stress-70 protein, mitochondrial	5.30605e+07	6.65155e+06	2.54711e+07	0	8.96384	3	3	5.98276	2	2	15.2852	5	5				665	72.3561	11.28
IPI00641681.2	Uncharacterized protein	1.00076e+08	0	0	0	7.15831	2	2										241	26.3519	11.2
IPI00647840.4	29 kDa protein	4.93726e+07	0	0	0	5.61805	2	2										262	29.4523	10.69
IPI01013601.1	Uncharacterized protein	3.37835e+07	0	0	0	8.88158	3	3										349	38.5892	10.6
IPI00183786.1	Isoform 1 of Fatty acid desaturase 2	7.44794e+07	0	3.49691e+07	0	11.1093	4	4				8.73866	3	3				444	52.2259	10.59
IPI01014129.1	cDNA FLJ60062, highly similar to 78 kDa glucose-regulated protein	0	0	2.98823e+07	0							6.55255	2	2				278	30.4008	10.43
IPI00964927.1	UDP-glucose 6-dehydrogenase isoform 3	0	16802309	0	0				10.7827	2	3							397	44.3869	10.33
IPI00299402.1	Pyruvate carboxylase, mitochondrial	8.48945e+07	9.20493e+07	5.14979e+07	3.3229e+07	8.00394	2	2	40.0532	8	12	15.7371	5	5	23.6218	6	7	1178	129.551	10.27
IPI00926977.1	26S protease regulatory subunit 10B	4.47365e+07	0	0	0	10.0088	3	3										403	45.768	9.93
IPI00478201.3	Uncharacterized protein	6.50489e+07	0	0	0	7.87907	3	3										332	37.7617	9.64
IPI00217232.2	Isoform 2 of Succinyl-CoA ligase [ADP-forming] subunit beta, mitochondrial	2.99077e+08	0	2.21348e+07	2.17962e+07	10.707	4	4				5.50323	2	2	6.56403	2	2	441	48.009	9.52
IPI00978251.1	Uncharacterized protein	3.26022e+07	0	0	0	6.12513	2	2										267	28.9815	9.36
IPI00651660.1	60S ribosomal protein L3 isoform b	1.54984e+08	0	0	0	7.75271	3	3										354	40.1266	9.32
IPI00294501.1	7-dehydrocholesterol reductase	136778893	0	2.14812e+07	0	11.621	2	3				5.08367	2	2				475	54.4538	9.05
IPI00644079.4	cDNA FLJ44920 fis, clone BRAMY3011501, highly similar to Heterogeneous nuclear ribonucleoprotein U	0	0	5.12982e+07	2.85117e+07							17.4387	5	6	7.12221	2	2	750	83.033	8.93
IPI00002203.6	Isoform 1 of BRCA2 and CDKN1A-interacting protein	0	0	2.45665e+07	0							5.86263	2	2				314	35.9567	8.92
IPI01022891.1	Uncharacterized protein	2.85328e+07	0	0	0	6.48136	2	2										273	30.8875	8.79
IPI01012981.1	cDNA FLJ59361, highly similar to Protein disulfide-isomerase	0	1.00011e+07	0	0				9.90223	2	3							492	55.3466	8.54
IPI00795913.1	4-hydroxyphenylpyruvate dioxygenase isoform 2	9.04363e+07	0	0	0	6.59666	2	2										354	40.4717	8.47
IPI00927538.1	Uncharacterized protein	4.95636e+07	0	5.48636e+07	0	7.59162	2	2				10.0472	3	3				411	45.9062	8.27
IPI00010130.3	Glutamine synthetase	7.61693e+07	0	0	0	5.59307	2	2										373	42.0373	7.51
IPI01012526.1	Uncharacterized protein	2.43132e+08	1.31646e+07	3.24822e+07	6.27995e+06	5.80064	2	2	13.5987	2	3	10.5517	3	3	8.296	2	2	847	96.1558	7.32
IPI00106668.5	perilipin-3 isoform 3	0	1.45329e+07	0	0				6.23702	2	2							422	45.7752	7.11
IPI00032533.3	WD repeat-containing protein 18	97224406	0	4.89981e+07	0	5.26698	2	2				4.99253	2	2				432	47.375	6.94
IPI00101782.3	Isoform 1 of Mannose-1-phosphate guanyltransferase alpha	5.16473e+07	0	0	0	4.96181	2	2										420	46.2621	6.9
IPI00910458.2	Uncharacterized protein	0	9.21256e+06	0	0				8.84255	2	2							379	41.7807	6.86
IPI00748985.1	Isoform 3 of Acyl-coenzyme A thioesterase 9, mitochondrial	0	0	4.26931e+06	0							5.90952	2	2				379	43.1789	6.07
IPI00917575.2	cDNA FLJ51046, highly similar to 60 kDa heat shock protein, mitochondrial	9.37259e+07	0	0	0	5.2089	2	2										517	55.0491	5.8
IPI01015174.2	Acyl-coenzyme A oxidase	0	1.57777e+07	0	0				5.46455	2	2							592	66.3679	5.57
IPI00419579.6	Cytochrome P450 20A1	0	0	1.76597e+07	0							9.52136	2	3				462	52.399	5.41
IPI00789370.3	serine hydroxymethyltransferase, mitochondrial isoform 3	0	1.53298e+07	0	0				7.45226	2	2							483	53.4214	5.38
IPI00009532.5	cDNA FLJ56034, highly similar to 4-aminobutyrate aminotransferase, mitochondrial	0	5.3592e+06	0	0				7.9565	2	2							515	58.1915	5.24
IPI00983461.1	origin recognition complex subunit 4 isoform 2	0	0	5.62921e+06	0							4.21011	2	2				352	40.844	5.11
IPI00796345.2	Acyl-coenzyme A oxidase	0	0	1.65752e+07	0							6.27959	2	2				667	75.0941	4.95
IPI00412742.1	Isoform 2 of Calcium-binding mitochondrial carrier protein SCaMC-1	0	0	2.23659e+07	0							5.26849	2	2				458	51.3212	4.8
IPI00218547.1	Isoform Short of Delta-1-pyrroline-5-carboxylate synthase	0	1.3796e+07	0	0				12.4343	3	4							793	87.0344	4.67
IPI00397801.4	Filaggrin-2	0	0	5.40835e+06	0							9.02859	2	2				2391	247.928	2.3
IPI00026781.3	Fatty acid synthase	2.97356e+07	0	2.25185e+07	0	9.41163	3	3				6.53434	2	2				2511	273.254	2.15
IPI00218342.11	C-1-tetrahydrofolate synthase, cytoplasmic	5.47636e+07	0	0	0	5.47504	2	2										991	107.367	2.12

## Sheet: ACVL2b -> ALDH1A1, ALDH2
		Area				Control (1)			Control (2)			ACVL2b (1)			ACVL2b (2)			General information
Accession	Description	Control (1)	Control (2)	ACVL2b (1)	ACVL2b (2)	Score A2	# Peptides A2	# PSM A2	Score B2	# Peptides B2	# PSM B2	Score C2	# Peptides C2	# PSM C2	Score D2	# Peptides D2	# PSM D2	# AAs	MW [kDa]	ΣCoverage
IPI00218914.5	Retinal dehydrogenase 1	6.4029e+07	1.34094e+09	8.74676e+08	3.90349e+09	30.5531	8	9	141.489	21	38	176.165	25	54	220.131	26	65	501	54.827	73.05
IPI01020686.1	Uncharacterized protein	5.68166e+08	4.46363e+08	8.40169e+07	1.5044e+09	233.539	19	67	97.8704	14	27	49.5133	9	16	160.396	17	52	435	48.4876	72.18
IPI00006663.1	Aldehyde dehydrogenase, mitochondrial	3.11725e+08	4.90168e+08	1.38266e+09	1.02586e+10	148.6	20	45	107.142	17	31	298.042	23	91	793.285	25	264	517	56.3456	71.76
IPI00019359.4	Keratin, type I cytoskeletal 9	6.6848e+07	6.21866e+08	8.68016e+07	3.94382e+08	27.3977	7	7	142.225	21	39	55.2245	9	14	75.1588	15	20	623	62.0268	70.63
IPI00007752.1	Tubulin beta-2C chain	5.68166e+08	4.7688e+08	8.8848e+07	1.5044e+09	236.839	19	69	111.658	15	30	72.5397	12	23	175.938	18	56	445	49.799	70.56
IPI00025252.1	Protein disulfide-isomerase A3	0	4.41603e+09	4.12543e+07	2.65396e+08				328.938	32	96	39.708	12	14	81.9259	19	26	505	56.7468	68.51
IPI01014382.2	Uncharacterized protein	1.72193e+09	736632260	1.19494e+08	1.74909e+09	303.386	23	95	106.716	17	31	69.4987	13	23	187.308	20	57	490	54.2526	61.02
IPI00893541.1	14 kDa protein	0	4.38545e+09	1.57357e+07	2.9977e+08				48.0689	6	14	6.06967	2	2	12.2727	2	4	123	13.5108	60.16
IPI00789806.2	Isoform 2 of Cytosol aminopeptidase	1.33108e+08	1.5788e+09	2.36123e+07	1.63071e+09	58.1741	13	19	39.5862	11	12	14.4685	5	5	83.4463	20	26	488	52.7379	59.43
IPI00152432.2	Isoform 1 of Alanine aminotransferase 2	6.20285e+07	4.04752e+08	4.95002e+07	2.54061e+08	44.7771	9	14	95.9026	17	28	35.8488	8	11	73.0583	15	21	523	57.8664	57.36
IPI00218343.4	Tubulin alpha-1C chain	7.05054e+08	2.57023e+09	3.10563e+08	1.58021e+09	127.656	15	38	171.848	16	54	59.9394	11	19	133.418	14	40	449	49.8635	56.12
IPI00013475.1	Tubulin beta-2A chain	5.68166e+08	4.46363e+08	8.40169e+07	1.5044e+09	186.353	15	53	90.7199	12	24	53.6579	9	17	144.011	16	47	445	49.875	55.96
IPI00930688.1	Tubulin alpha-1B chain	7.05054e+08	2.57023e+09	3.10563e+08	1.58021e+09	135.807	16	39	184.254	16	56	66.1992	12	20	130.807	15	39	451	50.1196	55.88
IPI00220327.4	Keratin, type II cytoskeletal 1	1.81312e+08	1.78616e+09	1.51224e+08	1.20871e+09	95.4671	17	29	181.403	22	49	83.5771	13	23	154.827	23	45	644	65.999	55.28
IPI00009865.4	Keratin, type I cytoskeletal 10	1.61606e+08	3.03487e+09	1.89962e+08	2.39151e+09	85.9431	17	26	198.813	24	55	102.168	17	30	237.026	27	72	584	58.7917	53.42
IPI00789370.3	serine hydroxymethyltransferase, mitochondrial isoform 3	2.85435e+08	2.39458e+08	0	8.41733e+08	102.671	13	32	25.1535	8	8				57.5485	12	18	483	53.4214	51.97
IPI00909059.5	cDNA FLJ53910, highly similar to Keratin, type II cytoskeletal 6A	3.12879e+07	2.05596e+08	1.3132e+08	9.41048e+08	7.55466	2	2	51.4456	15	16	42.29	6	12	147.355	24	48	535	57.8032	51.21
IPI00297779.7	T-complex protein 1 subunit beta	1.29058e+08	4.38694e+08	4.88578e+07	4.73404e+08	80.9263	15	23	86.7534	15	24	25.3974	5	8	102.868	19	28	535	57.4521	50.65
IPI00936002.1	Isoform 2 of Alpha-aminoadipic semialdehyde dehydrogenase	1.32118e+08	3.36797e+08	0	6.39573e+08	41.986	10	12	49.1888	12	14				85.2706	16	24	511	55.3315	49.9
IPI00021304.1	Keratin, type II cytoskeletal 2 epidermal	1.48673e+08	1.33393e+09	4.86429e+07	1.17624e+09	41.9128	9	13	114.936	21	32	44.4397	10	13	156.566	26	46	645	65.8254	49.77
IPI00007247.4	Propionyl-CoA carboxylase beta chain, mitochondrial	0	5.61145e+08	0	1.66317e+08				102.773	20	32				55.727	16	17	539	58.1788	49.54
IPI00299145.9	Keratin, type II cytoskeletal 6C	3.12879e+07	2.05596e+08	1.47252e+08	9.41048e+08	7.55466	2	2	48.813	14	15	44.6682	6	13	146.323	24	48	564	59.9883	48.58
IPI00031420.3	UDP-glucose 6-dehydrogenase	0	4.49339e+08	0	2.82825e+07				70.0403	18	23				5.90159	2	2	494	54.9893	46.56
IPI00010796.1	Protein disulfide-isomerase	1.12895e+07	4.79597e+08	3.48206e+06	94103479	8.46834	2	3	85.8325	16	26	6.41684	2	2	7.26628	3	3	508	57.0807	46.06
IPI00910738.1	cDNA FLJ60647, highly similar to Keratin, type II cytoskeletal 6B	3.12879e+07	2.05596e+08	1.3708e+08	9.41048e+08	7.55466	2	2	40.4037	11	12	28.0892	5	9	118.911	20	39	526	55.6981	45.63
IPI00019888.1	Succinate-semialdehyde dehydrogenase, mitochondrial	8.36149e+07	3.75124e+08	7.08867e+07	3.32598e+08	42.4703	8	13	44.7708	10	14	22.8168	6	8	26.9876	8	9	535	57.1783	45.05
IPI00384280.5	Prenylcysteine oxidase 1	0	1.03609e+09	0	2.18317e+08				105.592	15	35				34.5572	8	12	505	56.6037	44.55
IPI00784154.1	60 kDa heat shock protein, mitochondrial	3.2398e+07	1.82535e+08	1.42116e+07	4.50318e+07	43.3776	7	13	40.2869	9	11	8.57392	3	3	9.20733	3	3	573	61.0164	41.19
IPI00216951.2	Aspartyl-tRNA synthetase, cytoplasmic	7.70471e+07	3.4502e+07	0	2.66532e+08	35.8453	9	12	5.08321	2	2				46.5332	15	16	501	57.1	40.92
IPI00103467.5	Aldehyde dehydrogenase X, mitochondrial	2.45087e+08	4.26812e+08	1.93339e+08	3.25341e+09	77.2768	11	22	90.1997	12	25	36.4082	8	12	174.404	16	46	517	57.1702	40.62
IPI00013683.2	Tubulin beta-3 chain	5.58489e+08	4.46363e+08	8.40169e+07	1.43747e+09	126.326	11	37	75.9783	12	22	50.4094	8	15	123.003	15	40	450	50.4003	38.22
IPI00440493.2	ATP synthase subunit alpha, mitochondrial	1.75866e+08	5.23981e+07	2.21056e+07	3.68172e+08	71.4474	11	20	10.5362	4	4	8.55049	3	3	50.9214	11	16	553	59.7136	37.61
IPI00011200.5	D-3-phosphoglycerate dehydrogenase	3.88521e+07	9.62017e+08	8.24032e+07	1.48973e+08	22.9318	7	8	101.032	16	29	39.3934	8	13	21.384	6	6	533	56.6144	37.52
IPI00412737.1	tryptophanyl-tRNA synthetase, cytoplasmic isoform b	0	1.44823e+08	0	0				35.4897	9	10							430	48.8204	37.21
IPI01025367.1	56 kDa protein	2.03079e+07	4.88624e+08	7.25727e+07	8.48081e+07	11.9651	4	5	73.2759	14	24	32.226	7	11	7.02579	2	2	522	56.1917	36.78
IPI00217963.3	Keratin, type I cytoskeletal 16	0	9.06277e+06	4.85824e+07	1.29861e+09				5.22053	2	2	6.09319	2	2	99.7219	16	34	473	51.2362	36.58
IPI00759575.1	Isoform Cytoplasmic of Glutathione reductase, mitochondrial	1.28834e+08	3.34786e+08	3.59282e+07	4.98365e+08	33.851	7	11	38.5664	8	10	9.60539	2	3	30.2819	7	9	479	51.6674	36.53
IPI00009867.3	Keratin, type II cytoskeletal 5	0	3.6374e+08	5.14849e+07	5.56331e+08				42.3577	12	15	21.2619	4	7	110.146	17	38	590	62.34	36.44
IPI00384444.6	Keratin, type I cytoskeletal 14	0	4.55039e+07	2.21316e+07	7.84495e+08				11.402	4	4	11.9841	3	4	95.2023	14	32	472	51.5294	36.02
IPI00179964.5	Isoform 1 of Polypyrimidine tract-binding protein 1	6.98359e+07	6.00699e+08	2.61074e+07	1.52642e+08	43.224	8	12	63.2021	10	17	12.3564	3	4	16.0857	4	5	531	57.1856	35.78
IPI00514561.1	cDNA FLJ54552, highly similar to Heterogeneous nuclear ribonucleoprotein K	0	2.84522e+08	0	0				56.7638	11	15							428	47.5276	35.75
IPI00004968.1	Pre-mRNA-processing factor 19	0	3.32497e+08	0	0				44.3298	11	12							504	55.1463	35.12
IPI00289800.7	Isoform Short of Glucose-6-phosphate 1-dehydrogenase	8.27331e+06	3.2047e+08	9.84531e+06	7.30069e+07	5.01216	2	2	47.3661	13	17	10.9231	4	4	22.2853	8	8	515	59.219	34.95
IPI00026530.4	Protein ERGIC-53	1.08407e+08	8.14709e+08	7.95844e+07	2.82459e+08	23.3823	6	7	87.9914	13	23	25.5195	6	8	36.3638	8	10	510	57.513	33.92
IPI00963899.3	cDNA FLJ38173 fis, clone FCBBF1000053, highly similar to HYDROXYMETHYLGLUTARYL-COA SYNTHASE, CYTOPLASMIC	0	7.31942e+08	1.74879e+07	7.77322e+07				63.5894	13	18	8.18108	2	3	7.94685	3	3	509	56.2029	30.65
IPI00965713.3	fibrinogen beta chain isoform 2 preproprotein	0	1.76233e+08	0	0				36.7601	10	10							432	49.9232	30.09
IPI01013273.1	cDNA, FLJ79129, highly similar to T-complex protein 1 subunit zeta	2.79166e+07	0	0	116206303	15.0764	5	5							23.1642	6	7	500	54.8328	29.6
IPI00027497.5	Glucose-6-phosphate isomerase	0	8.66945e+08	0	1.62458e+07				85.2969	9	25				5.34548	2	2	558	63.1072	29.21
IPI00215687.1	Isoform 3 of Glutaminase kidney isoform, mitochondrial	0	2.48347e+08	0	0				51.4781	11	14							598	65.4179	29.1
IPI00006713.1	DnaJ homolog subfamily C member 3	0	2.00586e+08	1.82076e+07	0				33.7554	9	10	7.33065	2	3				504	57.5442	27.38
IPI00291510.3	Inosine-5'-monophosphate dehydrogenase 2	0	1.57237e+08	0	0				42.893	9	10							514	55.7696	26.46
IPI00410017.1	Isoform 2 of Polyadenylate-binding protein 1	0	99084627	0	3.34919e+07				43.8981	11	14				12.8155	3	4	547	61.142	25.59
IPI00783118.2	5'-nucleotidase domain-containing protein 2 isoform 1	0	1.97151e+08	0	0				40.297	10	12							557	64.1033	25.49
IPI00647280.2	Uncharacterized protein	0	4.26427e+07	0	8.24978e+07				4.92801	2	2				11.3613	4	4	257	29.335	25.29
IPI00030320.4	Probable ATP-dependent RNA helicase DDX6	6.29872e+07	4.50419e+07	0	6.89034e+07	40.9318	8	12	20.3015	3	5				20.5837	5	6	483	54.3823	24.84
IPI00304596.3	Non-POU domain-containing octamer-binding protein	9.28195e+06	1.04189e+08	0	4.40772e+07	6.77825	2	2	18.9459	6	6				21.6434	4	7	471	54.1973	24.63
IPI01009563.1	Adenylyl cyclase-associated protein	0	2.27843e+08	0	2.71085e+07				23.0343	7	7				4.51448	2	2	452	49.2774	24.56
IPI00333619.4	Isoform 1 of Fatty aldehyde dehydrogenase	0	0	0	3.7689e+08										51.1633	10	17	485	54.8129	24.54
IPI00027424.3	Isoform 1 of Glycerol kinase	0	1.64036e+08	0	4.69147e+07				31.6783	10	11				7.15155	3	3	524	57.4521	23.09
IPI00450768.7	Keratin, type I cytoskeletal 17	0	0	0	3.71313e+08										42.0291	10	14	432	48.076	21.99
IPI00607693.2	liver carboxylesterase 1 isoform c precursor	0	1.02039e+08	0	0				36.4827	8	10							566	62.3531	21.38
IPI00798375.2	cDNA FLJ59357, highly similar to Probable ATP-dependent RNA helicase DDX5	0	2.57503e+08	0	7.05713e+07				24.065	8	8				12.2612	4	4	544	61.4779	21.32
IPI00177728.3	Isoform 1 of Cytosolic non-specific dipeptidase	4.0628e+07	0	0	1.17054e+08	18.4775	5	6							27.6855	7	9	475	52.8449	20.21
IPI00007812.1	V-type proton ATPase subunit B, brain isoform	0	1.16787e+08	0	3.85783e+07				22.1998	7	7				4.38243	2	2	511	56.4649	19.37
IPI00797038.1	Isoform 1 of Phosphoenolpyruvate carboxykinase [GTP], mitochondrial	2.17587e+07	6.35473e+07	0	5.31033e+07	8.8532	3	3	22.091	7	7				6.03126	2	2	640	70.6846	19.06
IPI00465436.4	Catalase	2.04804e+07	1.43989e+08	0	0	5.73847	2	2	22.0873	7	7							527	59.7188	18.41
IPI00908896.2	Uncharacterized protein	1.10121e+07	0	0	5.14932e+07	6.73616	2	2							16.161	4	5	429	47.0574	18.41
IPI00020599.1	Calreticulin	0	8.16341e+07	0	0				22.0963	4	6							417	48.1118	18.23
IPI00022648.2	Eukaryotic translation initiation factor 5	0	6.8833e+07	0	4.81951e+07				11.0048	4	4				13.1625	5	5	431	49.1918	17.87
IPI01011421.2	Dihydrolipoyl dehydrogenase	0	3.09761e+08	0	0				42.2559	5	11							459	48.8503	16.56
IPI00219005.3	Peptidyl-prolyl cis-trans isomerase FKBP4	0	7.21567e+07	0	0				14.9845	4	4							459	51.7721	16.12
IPI00166749.3	Mitochondrial-processing peptidase subunit alpha	2.80466e+07	0	0	4.95627e+07	18.7384	5	6							5.69381	2	2	525	58.2156	15.62
IPI01025431.1	17 kDa protein	0	3.30463e+07	0	0				6.77604	2	2							161	17.4604	15.53
IPI00910144.2	Uncharacterized protein	0	7.67622e+07	0	0				13.7468	5	5							478	52.4445	15.48
IPI01015038.1	T-complex protein 1 subunit delta	0	1.07709e+08	0	0				22.3103	5	6							483	52.2979	14.91
IPI00514530.5	Uncharacterized protein	0	0	0	6.54664e+07										8.80704	3	3	289	32.2539	14.88
IPI00329331.6	Isoform 1 of UTP--glucose-1-phosphate uridylyltransferase	5.30532e+07	9.75076e+07	0	1.42007e+08	15.3675	4	5	5.94767	2	2				16.048	5	5	508	56.9047	14.57
IPI01022028.1	Protein	0	0	0	2.39765e+08										5.65879	2	2	192	21.7496	14.06
IPI00910614.1	heterogeneous nuclear ribonucleoprotein R isoform 4	0	6.88254e+07	0	0				17.1587	6	6							532	59.6447	13.91
IPI00465170.1	Isoform 1 of 5'-nucleotidase domain-containing protein 3	0	1.26631e+08	0	0				23.118	7	8							548	63.3791	13.87
IPI01011344.1	Uncharacterized protein	0	1.91776e+08	0	1.1276e+08				6.90525	2	2				12.5904	3	4	333	37.3826	13.51
IPI00171196.2	Isoform 3 of Keratin, type I cytoskeletal 13	0	0	0	3.5364e+08										21.6214	6	7	420	45.8386	13.33
IPI00018873.1	Nicotinamide phosphoribosyltransferase	0	0	0	4.2337e+07										15.3371	5	5	491	55.4866	13.24
IPI00412713.4	Sorting and assembly machinery component 50 homolog	0	6.21002e+07	0	4.17545e+07				15.9443	4	5				11.3124	3	4	469	51.9433	13.22
IPI00926839.1	Isoform 2 of Lanosterol 14-alpha demethylase	0	0	0	4.47784e+07										11.2957	4	4	404	46.2828	13.12
IPI00299402.1	Pyruvate carboxylase, mitochondrial	5.33766e+07	5.90945e+07	3.34292e+07	0	33.3197	8	10	14.1413	4	4	9.50592	2	3				1178	129.551	12.99
IPI00651677.1	Isoform 2 of Probable ATP-dependent RNA helicase DDX17	0	2.24122e+08	0	5.9087e+07				16.8713	6	6				9.74403	3	3	652	72.4961	12.73
IPI00027851.2	cDNA FLJ53927, highly similar to Beta-hexosaminidase alpha chain	0	2.93288e+07	0	6.61299e+07				4.79697	2	2				11.0154	4	4	540	61.9739	12.59
IPI01018135.1	cDNA FLJ39696 fis, clone SMINT2011033, highly similar to Sorting and assembly machinery component 50 homolog	0	7.6736e+07	0	5.37221e+07				5.43788	2	2				7.79973	2	3	274	30.1932	12.41
IPI00032220.3	Angiotensinogen	0	5.70208e+07	0	4.15871e+07				14.4817	4	4				17.5771	4	5	485	53.1205	12.16
IPI00883950.1	Similar to cytoskeleton-associated protein 4 (Fragment)	0	8.49656e+07	0	0				16.2115	5	5							560	62.023	12.14
IPI00952607.1	T-complex protein 1 subunit eta isoform d	0	1.06832e+08	0	0				17.7116	4	5							499	54.7695	12.02
IPI00218547.1	Isoform Short of Delta-1-pyrroline-5-carboxylate synthase	0	8.71443e+07	0	0				25.1265	7	8							793	87.0344	11.98
IPI00909399.2	xaa-Pro dipeptidase isoform 3	0	1.15802e+08	0	0				12.1436	4	4							429	47.2304	11.89
IPI00789428.1	Isoform 2 of Methylcrotonoyl-CoA carboxylase beta chain, mitochondrial	0	52482503	0	0				14.2736	4	4							525	57.4824	10.67
IPI00930698.1	delta-1-pyrroline-5-carboxylate dehydrogenase, mitochondrial isoform b	0	4.48489e+07	0	2.31142e+07				8.3861	3	3				6.64625	3	3	503	55.0829	10.54
IPI01013559.1	cDNA FLJ58502, highly similar to Protein disulfide-isomerase A6	0	0	0	8.0103e+07										10.7337	3	3	437	47.8081	10.3
IPI01008932.1	cDNA FLJ53870, highly similar to 24-dehydrocholesterol reductase	0	2.28083e+08	0	3.01141e+08				12.2013	3	4				16.2679	4	5	475	54.7145	10.11
IPI00028229.6	UDP-glucuronosyltransferase 2A3	0	6.82097e+07	0	2.96427e+07				9.31366	3	3				15.1255	4	5	527	60.215	10.06
IPI00336016.3	Probable cysteinyl-tRNA synthetase, mitochondrial	0	1.37235e+08	0	0				14.27	5	5							564	62.1847	9.93
IPI00747747.1	Eukaryotic translation initiation factor 2B, subunit 3 gamma, 58kDa	0	0	0	5.82848e+06										4.66998	2	2	222	24.9368	9.46
IPI00002214.1	Importin subunit alpha-2	0	6.0306e+07	0	0				10.7701	3	3							529	57.8259	9.45
IPI01010266.1	cDNA FLJ57237, highly similar to FK506-binding protein 5	0	0	0	1.71363e+07										4.96228	2	2	278	31.5847	9.35
IPI00006510.1	Tubulin beta-1 chain	3.37342e+08	2.68888e+08	1.00074e+08	8.81541e+08	25.146	3	9	13.4742	3	5	17.9019	2	6	26.3817	4	9	451	50.2946	9.31
IPI00941463.1	Nucleosome assembly protein 1-like 4	0	3.56407e+07	0	0				6.6081	2	2							375	42.7969	8.53
IPI00980998.2	cDNA FLJ57232, highly similar to Lysosomal Pro-X carboxypeptidase	0	4.57829e+07	0	0				6.18135	2	2							391	43.9056	8.44
IPI00027230.3	Endoplasmin	0	6.65644e+07	0	0				12.0785	4	4							803	92.4113	8.22
IPI00011126.6	26S protease regulatory subunit 4	0	1.83503e+07	0	0				9.66767	3	3							440	49.1537	8.18
IPI00910754.1	L-lactate dehydrogenase A chain isoform 2	0	0	0	1.72273e+07										5.38363	2	2	274	30.1858	8.03
IPI00009532.5	cDNA FLJ56034, highly similar to 4-aminobutyrate aminotransferase, mitochondrial	0	8.42267e+06	0	0				8.99234	3	3							515	58.1915	7.77
IPI00966657.1	Uncharacterized protein	0	2.81518e+07	0	0				7.11403	2	2							433	48.1297	7.39
IPI00420108.6	Dihydrolipoyllysine-residue succinyltransferase component of 2-oxoglutarate dehydrogenase complex, mitochondrial	4.07439e+07	0	0	0	8.48434	3	3										453	48.7245	7.28
IPI00983581.1	SYNCRIP protein (Fragment)	0	4.71439e+07	0	0				7.62672	3	3							453	50.6189	7.28
IPI00847896.1	Similar to Glutamate-rich WD repeat-containing protein 1	0	2.33803e+07	0	0				9.50615	2	2							445	49.2291	7.19
IPI00186290.6	Elongation factor 2	9.66503e+06	4.274e+07	0	0	5.5502	2	2	8.29443	3	3							858	95.277	6.88
IPI01015222.1	cDNA FLJ54259, highly similar to Smu-1 suppressor of mec-8 and unc-52 protein homolog	0	4.58244e+07	0	4.18993e+07				5.8245	2	2				5.90061	2	2	352	39.3177	6.53
IPI00556297.1	Arginine/serine-rich splicing factor 6 variant (Fragment)	0	0	0	3.18232e+07										4.5565	2	2	279	31.8461	6.45
IPI00254338.2	Protein FAM134C	0	2.14308e+07	0	0				5.68226	2	2							466	51.3637	6.44
IPI00554648.3	Keratin, type II cytoskeletal 8	0	0	0	7.703e+07										16.4888	3	6	483	53.6711	6.42
IPI00642156.1	Probable glutamyl-tRNA synthetase, mitochondrial	2.68805e+07	0	1.40188e+07	8.48074e+07	5.04611	2	2				4.83016	2	2	4.83566	2	2	523	58.6516	5.74
IPI00241238.3	retinal dehydrogenase 2 isoform 3	0	0	0	2.23092e+09										12.5042	3	5	422	46.1075	5.69
IPI00383581.4	cDNA FLJ61290, highly similar to Neutral alpha-glucosidase AB	2.42004e+07	8.12462e+07	8.41205e+06	4.61701e+07	14.1063	2	3	9.35586	3	3	16.9055	3	4	6.07669	2	2	995	112.855	5.53
IPI00099463.2	Sphingosine-1-phosphate lyase 1	0	7.63254e+07	0	0				6.17908	2	2							568	63.4827	5.46
IPI00847989.3	Pyruvate kinase	0	4.33346e+07	0	0				7.01651	2	2							458	49.9949	5.24
IPI00794673.2	cDNA FLJ59382, highly similar to T-complex protein 1 subunit theta	0	1.25471e+07	0	0				6.73331	2	2							475	51.5533	5.05
IPI00414676.6	Heat shock protein HSP 90-beta	0	6.14711e+07	0	5.12728e+07				8.13042	3	3				6.34092	2	2	724	83.2121	4.83
IPI00289171.2	Cytochrome P450 4F12	0	2.55085e+07	0	0				5.30038	2	2							524	60.231	4.58
IPI00029784.3	UDP-glucuronosyltransferase 2B7	0	0	0	1.27014e+07										5.09749	2	2	529	60.655	3.97
IPI00922694.2	Uncharacterized protein	0	2.1554e+07	0	0				4.91919	2	2							632	69.8831	3.8
IPI01015738.1	Uncharacterized protein	0	2.66644e+07	0	0				6.04347	2	2							692	79.8635	3.61
IPI00419920.2	cocaine esterase isoform 2	0	4.52366e+07	0	0				4.74732	2	2							607	67.0079	3.29
IPI00397801.4	Filaggrin-2	0	5.43798e+06	0	0				7.01581	2	2							2391	247.928	2.26
IPI00026781.3	Fatty acid synthase	0	1.81292e+07	0	0				9.02584	3	3							2511	273.254	1.43
IPI00853372.3	Isoform 7 of Uncharacterized protein KIAA1109	0	2.827e+08	0	0				4.88102	2	2							4251	470.633	0.59

## Sheet: ACV1 -> ALDH4A1
		Area				Control (1)			Control (2)			ACV1 (1)			ACV1 (2)			General information
Accession	Description	Control (1)	Control (2)	ACV1 (1)	ACV1 (2)	Score A2	# Peptides A2	# PSM A2	Score B2	# Peptides B2	# PSM B2	Score C2	# Peptides C2	# PSM C2	Score D2	# Peptides D2	# PSM D2	# AAs	MW [kDa]	ΣCoverage
IPI00784154.1	60 kDa heat shock protein, mitochondrial	2.54781e+09	1.82015e+09	1.41824e+10	2.35487e+09	360.403	33	98	497.348	34	143	915.309	41	326	557.387	30	159	573	61.0164	80.28
IPI00019359.4	Keratin, type I cytoskeletal 9	1.75335e+09	4.90513e+07	1.4312e+09	1.89609e+08	265.072	27	70	27.4199	7	8	156.086	20	46	78.0668	15	21	623	62.0268	79.78
IPI00217871.4	Delta-1-pyrroline-5-carboxylate dehydrogenase, mitochondrial	9.64233e+07	4.69889e+07	1.68649e+10	2.30771e+09	17.4957	5	5	39.8839	8	13	664.325	27	215	205.683	19	68	563	61.6806	63.59
IPI00479186.7	Isoform M2 of Pyruvate kinase isozymes M1/M2	1.10687e+08	8.07059e+07	1.97631e+09	2.10675e+08	27.5228	8	8	57.2805	13	16	199.309	24	53	65.0657	13	22	531	57.9	62.34
IPI00021304.1	Keratin, type II cytoskeletal 2 epidermal	1.48898e+09	8.89465e+07	1.9443e+09	2.4187e+08	132.742	27	41	29.0472	9	10	81.9231	19	26	40.4644	10	14	645	65.8254	60.31
IPI00386755.2	ERO1-like protein alpha	2.44642e+08	0	62575972	4.50994e+07	61.3776	16	18				6.48176	2	2	15.3807	5	6	468	54.3581	56.2
IPI00551024.5	Bifunctional ATP-dependent dihydroxyacetone kinase/FAD-AMP lyase (cyclizing)	4.17905e+08	7.45446e+07	839394378	9.5236e+07	89.08	16	26	35.2961	7	10	76.0164	14	22	55.2381	9	17	575	58.91	56.17
IPI00220327.4	Keratin, type II cytoskeletal 1	1.95386e+09	1.40167e+08	2.79443e+09	4.05661e+08	293.107	31	85	52.9097	12	17	216.33	29	65	113.038	17	33	644	65.999	55.59
IPI00553185.2	T-complex protein 1 subunit gamma	6.30188e+08	3.84774e+07	9.58502e+07	1.11466e+08	118.85	25	41	22.6021	7	8	13.7845	5	5	32.3672	7	11	545	60.4953	54.68
IPI00289499.3	Bifunctional purine biosynthesis protein PURH	191305352	0	1.77619e+07	5.16501e+07	93.9812	21	27				6.46277	2	2	15.8749	6	6	592	64.5753	53.38
IPI00465436.4	Catalase	1.02087e+08	1.09687e+08	1.83639e+09	1.28278e+08	22.3132	7	7	59.1651	14	19	123.609	22	37	66.6873	15	22	527	59.7188	53.32
IPI00607693.2	liver carboxylesterase 1 isoform c precursor	4.73183e+07	3.08167e+07	1.62948e+09	1.11824e+08	13.9505	5	5	22.519	5	8	132.777	21	39	28.8228	8	9	566	62.3531	52.65
IPI00020599.1	Calreticulin	1.31551e+09	4.31845e+07	3.82809e+08	1.82719e+08	137.001	15	38	30.2851	6	9	51.4438	8	15	41.543	7	13	417	48.1118	49.64
IPI00302925.4	59 kDa protein	0	3.14557e+07	2.93744e+08	3.73584e+07				29.9482	9	11	74.902	20	25	14.5477	4	5	547	59.4404	48.63
IPI00009865.4	Keratin, type I cytoskeletal 10	4.8105e+08	9.24893e+07	6.09425e+08	1.2425e+08	85.4639	20	25	32.3125	9	10	71.7235	21	23	37.5268	10	13	584	58.7917	46.92
IPI01014074.1	cDNA FLJ53296, highly similar to Serine/threonine-protein phosphatase 2A 65 kDa regulatory subunit A alpha isoform	3.24205e+08	3.10635e+07	6.85952e+07	6.75412e+07	99.213	19	30	32.1634	9	11	17.3296	6	6	21.1061	6	7	579	64.1403	46.46
IPI00009923.1	Isoform 1 of Prolyl 4-hydroxylase subunit alpha-1	5.11368e+08	8.2248e+07	8.31059e+08	1.35306e+08	123.67	21	36	37.6684	9	11	94.6452	18	29	57.5679	12	18	534	61.011	44.76
IPI00027626.3	T-complex protein 1 subunit zeta	2.3031e+08	5.45392e+07	8.14043e+07	0	62.7268	12	18	28.649	9	10	15.8199	5	5				531	57.9876	44.07
IPI00010720.1	T-complex protein 1 subunit epsilon	8.41056e+07	8.76482e+07	4.61493e+08	5.08679e+07	34.4148	10	11	57.1164	15	20	65.8087	15	20	14.6963	5	5	541	59.6328	43.81
IPI00216049.1	Isoform 1 of Heterogeneous nuclear ribonucleoprotein K	9.05332e+08	4.76494e+07	4.43185e+07	9.64018e+07	136.252	13	39	33.8418	9	11	8.21641	3	3	30.9234	4	8	463	50.9444	42.33
IPI00383680.3	dolichyl-diphosphooligosaccharide--protein glycosyltransferase subunit 2 isoform 2 precursor	5.39364e+08	0	5.48358e+08	0	135.048	17	36				74.9263	12	21				615	67.6814	40.98
IPI00027834.3	Heterogeneous nuclear ribonucleoprotein L	7.10687e+08	2.72878e+07	2.2057e+08	1.01647e+08	117.258	13	34	12.8724	3	4	34.8557	8	10	46.1492	10	13	589	64.0924	40.24
IPI00027547.2	Dermcidin	5.78532e+07	0	4.24041e+08	0	5.39633	2	2				15.914	3	6				110	11.2768	35.45
IPI00290566.1	T-complex protein 1 subunit alpha	1.03388e+08	1.82794e+07	3.66075e+07	0	52.6041	15	16	8.89284	3	3	7.82615	3	3				556	60.3056	35.25
IPI00332828.1	cocaine esterase isoform 1	1.22444e+08	9.27739e+07	1.05436e+09	6.78947e+07	27.3836	8	9	17.8257	4	6	69.3014	13	22	26.8221	7	10	623	68.8548	31.78
IPI00021439.1	Actin, cytoplasmic 1	1.9491e+08	3.74881e+07	2.46699e+08	6.66314e+07	17.1752	4	5	4.6914	2	2	24.4072	7	9	12.5619	4	4	375	41.7097	31.73
IPI00216952.1	Isoform C of Prelamin-A/C	1.40892e+08	0	0	0	60.5036	15	19										572	65.0956	31.29
IPI00853165.3	Uncharacterized protein	3.86744e+07	0	8.67888e+07	0	23.0714	7	7				18.7624	6	6				510	57.8222	30.98
IPI00219526.6	Isoform 1 of Phosphoglucomutase-1	2.10181e+08	0	2.4345e+07	0	57.2191	13	18				5.10387	2	2				562	61.4105	30.6
IPI00967282.1	cDNA FLJ54351, weakly similar to Long-chain-fatty-acid--CoA ligase	2.57537e+08	0	0	2.71619e+07	65.6412	14	21							15.2053	5	6	602	66.755	29.73
IPI00909762.1	cDNA FLJ53765, highly similar to Tubulin alpha chain	3.76099e+07	0	0	0	9.72413	3	3										182	20.0304	29.12
IPI00218830.1	Isoform Short of Glycylpeptide N-tetradecanoyltransferase 1	1.2111e+08	0	0	0	31.204	8	9										416	48.1098	28.37
IPI00011603.2	26S proteasome non-ATPase regulatory subunit 3	1.59524e+08	0	2.57301e+07	0	30.8561	9	9				4.36843	2	2				534	60.9395	28.28
IPI00909059.5	cDNA FLJ53910, highly similar to Keratin, type II cytoskeletal 6A	6.66125e+08	3.70554e+07	7.91908e+08	0	34.9507	8	13	27.9968	9	10	32.7175	9	12				535	57.8032	28.22
IPI00956313.2	Uncharacterized protein	6.66125e+08	3.70554e+07	7.91908e+08	0	34.9507	8	13	28.3226	9	10	32.7175	9	12				549	58.4325	27.5
IPI00797038.1	Isoform 1 of Phosphoenolpyruvate carboxykinase [GTP], mitochondrial	7.74485e+07	0	6.90842e+07	4.40586e+07	39.735	12	13				17.7389	6	6	17.7239	5	6	640	70.6846	27.03
IPI00010796.1	Protein disulfide-isomerase	2.91297e+07	3.42212e+07	1.87085e+08	1.39458e+07	4.56728	2	2	14.8572	4	5	43.8265	11	14	9.92733	2	4	508	57.0807	26.97
IPI00383581.4	cDNA FLJ61290, highly similar to Neutral alpha-glucosidase AB	2.414e+08	1.23887e+07	2.6777e+08	2.93864e+07	75.1012	16	22	7.9291	2	2	41.883	9	12	12.1396	2	3	995	112.855	26.43
IPI00830039.1	Isoform 2 of Splicing factor U2AF 65 kDa subunit	1.04329e+08	0	4.11467e+07	0	24.0488	5	6				7.49844	2	2				471	53.087	25.27
IPI00182373.2	Isoform IIa of Prolyl 4-hydroxylase subunit alpha-2	0	0	1.48934e+08	0							32.7453	10	10				533	60.5946	24.77
IPI00007074.5	Tyrosyl-tRNA synthetase, cytoplasmic	0	1.27015e+07	1.30636e+08	5.77773e+06				4.73996	2	2	30.8965	11	11	4.45176	2	2	528	59.1061	24.62
IPI00930134.1	cDNA FLJ76695, highly similar to Homo sapiens acyl-CoA synthetase medium-chain family member 2 (ACSM2), nuclear gene encoding mitochondrial protein, mRNA	4.59891e+07	1.62289e+07	1.26287e+08	0	17.0964	5	5	6.96456	3	3	37.1248	6	11				577	64.2188	23.4
IPI00927191.2	Isoform 3 of Beta-galactosidase	1.90778e+08	1.18134e+07	2.57629e+08	6.58215e+07	39.479	10	14	8.27638	2	3	39.1421	8	13	16.5103	6	6	647	72.7045	22.87
IPI00983581.1	SYNCRIP protein (Fragment)	8.7875e+07	0	3.39705e+07	1.12281e+07	22.0256	6	7				10.9431	4	4	7.87646	3	3	453	50.6189	22.3
IPI00009867.3	Keratin, type II cytoskeletal 5	5.07817e+08	1.8343e+07	6.42961e+08	0	33.7106	8	12	7.71968	3	3	37.7846	11	14				590	62.34	22.2
IPI00031479.1	Protein disulfide-isomerase A5	0	0	2.14261e+08	1.27541e+07							37.9469	10	13	4.89244	2	2	519	59.5561	22.16
IPI00514530.5	Uncharacterized protein	1.23793e+08	3.74881e+07	1.34255e+08	0	14.2657	3	4	4.6914	2	2	16.1636	5	6				289	32.2539	22.15
IPI00514595.3	Isoform 2 of Carnitine O-acetyltransferase	1.41595e+08	0	0	0	37.8312	10	11										605	68.525	21.98
IPI00966238.2	cDNA FLJ51907, highly similar to Stress-70 protein, mitochondrial	7.96527e+07	0	4.65929e+07	0	32.3271	10	10				6.42227	2	2				665	72.3561	21.65
IPI00152981.1	Acyl-CoA dehydrogenase family member 9, mitochondrial	1.00107e+08	0	0	0	32.0257	11	11										621	68.7167	21.58
IPI01014382.2	Uncharacterized protein	5.34915e+07	0	5.50459e+07	0	14.3288	5	5				19.5007	7	7				490	54.2526	21.22
IPI00384444.6	Keratin, type I cytoskeletal 14	1.24528e+08	6.63336e+07	1.56306e+08	0	18.1451	6	6	14.424	5	5	13.6696	5	5				472	51.5294	19.92
IPI00943173.1	Coronin-1C	0	0	1.14971e+08	0							27.5963	10	10				474	53.2151	18.35
IPI00178744.5	Isoform 2 of Very long-chain specific acyl-CoA dehydrogenase, mitochondrial	7.81719e+07	0	0	0	28.2762	8	9										633	68.0152	17.22
IPI00939917.1	Isoform 3 of SWI/SNF-related matrix-associated actin-dependent regulator of chromatin subfamily D member 2	0	0	9.30708e+07	0							22.9598	6	7				483	55.2037	16.98
IPI00925572.1	asparagine synthetase [glutamine-hydrolyzing] isoform b	4.02232e+07	0	1.26508e+08	0	9.6625	4	4				22.8614	7	8				540	62.1287	16.67
IPI00299402.1	Pyruvate carboxylase, mitochondrial	8.75155e+07	1.70046e+07	4.45634e+07	5.21823e+07	41.2701	10	11	6.73129	3	3	8.50647	3	3	17.3887	4	5	1178	129.551	16.38
IPI01009339.1	27 kDa protein	2.55465e+07	0	0	0	10.5803	3	3										248	27.2572	16.13
IPI00296157.6	Isoform 1 of All-trans-retinol 13,14-reductase	7.38533e+07	0	0	0	31.3868	7	10										610	66.7767	15.74
IPI00966829.1	69 kDa protein	2.49695e+08	0	0	0	39.2373	9	12										604	69.1814	15.73
IPI00180983.1	Isoform 2 of Insulin-like growth factor 2 mRNA-binding protein 2	7.89604e+07	0	0	1.3315e+07	17.4071	6	6							5.05251	2	2	556	61.8043	15.29
IPI01017876.1	Isoform 2 of Acetolactate synthase-like protein	2.23887e+07	0	0	0	6.82958	2	2										224	23.1803	15.18
IPI01022641.1	Uncharacterized protein	1.04368e+07	0	0	0	5.05313	2	2										145	16.5262	15.17
IPI00651677.1	Isoform 2 of Probable ATP-dependent RNA helicase DDX17	1.01448e+08	0	5.64633e+07	0	17.9221	6	6				10.489	4	4				652	72.4961	14.88
IPI00217963.3	Keratin, type I cytoskeletal 16	1.18473e+08	6.46826e+07	1.99672e+08	0	8.90312	3	3	16.498	5	6	4.53006	2	2				473	51.2362	14.8
IPI00017617.1	Probable ATP-dependent RNA helicase DDX5	1.00378e+08	0	0	0	22.5319	8	8										614	69.1047	14.66
IPI00910614.1	heterogeneous nuclear ribonucleoprotein R isoform 4	8.7923e+07	0	4.96478e+07	0	13.9224	5	5				5.9657	2	2				532	59.6447	14.47
IPI00383296.5	Isoform 2 of Heterogeneous nuclear ribonucleoprotein M	7.50525e+07	0	5.37328e+07	0	17.0471	6	6				8.63741	3	3				691	73.5724	14.18
IPI00925990.1	Uncharacterized protein	2.50322e+07	0	0	0	6.5669	2	2										185	20.3298	14.05
IPI00917016.2	copine-1 isoform c	9.64433e+07	0	0	3.91929e+07	14.1917	5	5							12.5961	4	4	536	58.8935	13.81
IPI01020675.1	75 kDa protein	5.09775e+07	0	0	0	20.0079	6	6										685	74.5444	13.72
IPI00981926.1	Uncharacterized protein	4.57513e+07	0	0	0	5.40332	2	2										168	17.9051	13.69
IPI00027230.3	Endoplasmin	1.2753e+08	0	1.39396e+08	3.70602e+07	87.6705	8	27				6.47542	2	2	5.66601	2	2	803	92.4113	13.45
IPI00972999.1	Histone deacetylase	0	0	7.70457e+07	0							23.1673	4	7				458	51.9653	13.32
IPI00377261.1	Isoform 1 of Far upstream element-binding protein 3	7.1097e+07	0	0	0	14.5432	4	4										572	61.6022	11.89
IPI00103467.5	Aldehyde dehydrogenase X, mitochondrial	4.05265e+07	0	0	0	16.9139	5	5										517	57.1702	11.61
IPI00784044.1	Isoform 1 of Methylcrotonoyl-CoA carboxylase beta chain, mitochondrial	0	0	5.482e+07	0							13.9236	5	5				563	61.2944	11.37
IPI00923547.1	60 kDa chaperonin (Fragment)	9.91988e+07	6.94801e+08	2.27432e+08	0	7.007	2	3	13.8674	2	6	8.98633	2	4				185	19.7657	11.35
IPI00640357.1	ubiquitin carboxyl-terminal hydrolase 14 isoform b	0	0	5.80319e+07	0							11.7674	4	4				459	52.3523	11.33
IPI00412880.2	Isoform 1 of Histone-arginine methyltransferase CARM1	5.79414e+07	0	5.793e+07	0	13.4671	5	5				8.62128	3	3				585	63.4192	11.28
IPI00184821.1	Isoform 1 of Bifunctional coenzyme A synthase	4.73234e+07	0	6.15244e+07	0	14.1053	4	4				15.5619	5	5				564	62.29	10.99
IPI00218547.1	Isoform Short of Delta-1-pyrroline-5-carboxylate synthase	9.56916e+06	2.02658e+07	5.67273e+07	4.24033e+06	9.99547	4	4	12.3132	3	5	8.81783	3	3	6.52712	2	2	793	87.0344	10.72
IPI00911041.1	cDNA FLJ51339, highly similar to Methionyl-tRNA synthetase, mitochondrial	0	0	9.18204e+07	0							12.4973	4	4				520	58.4418	10.58
IPI00216858.3	Isoform 2 of Beta-1-syntrophin	0	0	8.69602e+07	0							5.77683	2	2				382	40.7803	10.47
IPI00922603.1	cDNA FLJ52418, highly similar to Amine oxidase (flavin-containing) B	2.63252e+07	0	9.33937e+07	0	9.62759	2	3				15.1074	5	5				411	46.5087	10.46
IPI00329625.5	cDNA FLJ56153, highly similar to Homo sapiens transforming growth factor beta regulator 4 (TBRG4), transcript variant 1, mRNA	0	1.2562e+07	1.8252e+08	0				5.51123	2	2	18.5826	5	6				642	71.8119	10.28
IPI00646144.3	ATPase family AAA domain-containing protein 3A isoform 3	4.3439e+07	0	0	0	10.7263	4	4										507	57.912	10.26
IPI00793954.1	cDNA FLJ32415 fis, clone SKMUS2000724, highly similar to 2-hydroxyphytanoyl-CoA lyase	3.51586e+07	0	0	0	7.71133	2	2										337	37.598	10.09
IPI00022275.6	Phosphatidylinositide phosphatase SAC1	0	0	8.87616e+07	0							14.8417	6	6				587	66.924	9.88
IPI00019988.1	N-sulphoglucosamine sulphohydrolase	2.49178e+07	5.61741e+06	1.65697e+08	1.69441e+07	5.11953	2	2	4.96272	2	2	12.4556	4	4	9.93019	2	4	502	56.6595	9.76
IPI00978981.1	Uncharacterized protein	0	0	2.68652e+07	0							9.49893	3	3				479	53.0337	9.6
IPI00945529.1	Uncharacterized protein	4.60425e+07	0	0	0	14.6353	5	5										598	66.4258	9.53
IPI01026216.1	69 kDa protein	9.91291e+07	0	0	6.00209e+06	15.3043	5	5							5.21824	2	2	634	69.4417	9.46
IPI00908449.1	cDNA FLJ58737, highly similar to Splicing factor 3A subunit 3	0	0	3.79098e+07	0							9.83066	3	3				448	52.3951	9.38
IPI00984387.1	cDNA FLJ53166, highly similar to Dihydropyrimidinase-related protein 2	3.63329e+07	0	1.12498e+08	0	10.1902	3	3				4.98935	2	2				536	58.1264	9.14
IPI01012475.1	Uncharacterized protein	0	0	2.6839e+07	0							7.0331	2	2				279	31.9003	8.96
IPI00082310.1	Isoform 3 of KH domain-containing, RNA-binding, signal transduction-associated protein 1	3.06134e+07	0	0	0	8.40648	2	2										404	43.9999	8.42
IPI00022664.3	Geranylgeranyl transferase type-2 subunit alpha	3.15651e+07	0	0	0	12.2403	4	4										567	65.0305	8.11
IPI00289159.3	Isoform 1 of Glutaminase kidney isoform, mitochondrial	6.27421e+07	0	0	0	10.9364	3	3										669	73.4139	8.07
IPI00414676.6	Heat shock protein HSP 90-beta	8.45803e+07	0	9.67643e+07	2.22736e+07	12.0292	4	4				14.5953	5	5	5.31797	2	2	724	83.2121	7.87
IPI00009904.1	Protein disulfide-isomerase A4	0	0	0	7.58877e+06										11.4919	4	4	645	72.887	7.75
IPI00985384.1	ATP-dependent RNA helicase DDX3X isoform 3	3.58708e+07	0	0	0	17.7327	4	5										646	71.3109	7.74
IPI00024934.5	Methylmalonyl-CoA mutase, mitochondrial	3.43363e+07	0	5.74901e+07	0	8.87697	3	3				11.6509	4	4				750	83.0818	7.73
IPI00003362.3	78 kDa glucose-regulated protein	3.6876e+07	0	3.51809e+07	0	11.8104	4	4				4.99086	2	2				654	72.2884	7.65
IPI00029717.1	Isoform 2 of Fibrinogen alpha chain	6.04538e+07	0	0	0	10.3132	3	3										644	69.7138	7.61
IPI00449920.1	cDNA FLJ90170 fis, clone MAMMA1000370, highly similar to Ig alpha-1 chain C region	0	0	1.16529e+08	0							7.67462	3	3				493	53.1903	7.51
IPI00743775.1	Isoform 2 of Coiled-coil domain-containing protein 47	0	0	4.43067e+07	0							10.6475	3	3				480	55.2827	7.29
IPI00165261.6	Sec1 family domain-containing protein 1	0	0	2.97212e+07	0							10.0062	3	3				642	72.3341	6.85
IPI00186290.6	Elongation factor 2	1.71254e+07	0	0	0	9.38594	3	3										858	95.277	6.53
IPI00793589.2	cDNA FLJ51740, highly similar to Dolichyl-diphosphooligosaccharide--proteinglycosyltransferase 67 kDa subunit	3.40692e+07	0	0	0	8.33379	3	3										581	65.7972	6.02
IPI01012012.1	61 kDa protein	3.4382e+07	0	0	0	7.25962	2	2										533	60.7554	5.82
IPI00013808.1	Alpha-actinin-4	2.88935e+07	0	0	0	13.0406	4	4										911	104.788	5.38
IPI00983309.1	Uncharacterized protein	3.00451e+07	0	4.72233e+07	0	4.93191	2	2				5.15083	2	2				613	69.5432	5.06
IPI00479951.4	Isoform 2 of FAST kinase domain-containing protein 2	1.60744e+07	0	8.84149e+06	0	11.5459	3	4				5.36412	2	2				648	74.4875	4.94
IPI00915274.1	H/ACA ribonucleoprotein complex subunit 4 isoform 2	0	0	4.04934e+07	0							5.8636	2	2				509	56.9965	4.72
IPI00646055.3	Uncharacterized protein	0	0	5.47465e+07	0							7.54284	2	2				651	74.2207	4.45
IPI00789225.3	Isoform 3 of NudC domain-containing protein 1	0	0	5.24149e+07	0							5.82215	2	2				496	56.5783	4.03
IPI00329306.3	Keratin, type II cytoskeletal 74	3.38506e+07	0	9.8218e+07	0	6.37798	2	2				8.7445	3	3				529	57.8296	3.97
IPI00157908.4	Isoform 3 of Apoptosis-inducing factor 1, mitochondrial	4.38055e+07	0	0	0	5.36986	2	2										609	66.2536	3.94
IPI00552419.3	propionyl-CoA carboxylase alpha chain, mitochondrial isoform c precursor	0	1.22061e+07	0	0				5.20899	2	2							681	74.9544	3.82
IPI00022774.3	Transitional endoplasmic reticulum ATPase	8.92586e+06	0	0	0	6.39559	2	2										806	89.2657	3.72
IPI00644079.4	cDNA FLJ44920 fis, clone BRAMY3011501, highly similar to Heterogeneous nuclear ribonucleoprotein U	0	0	5.44388e+07	0							5.78292	2	2				750	83.033	3.07
IPI00026781.3	Fatty acid synthase	3.43164e+07	0	3.97303e+07	0	19.8755	6	6				8.68101	3	3				2511	273.254	3.03
IPI00398625.5	Hornerin	5.48397e+06	0	4.2396e+07	0	5.96006	2	2				9.35063	2	3				2850	282.228	2.98
IPI00844578.1	ATP-dependent RNA helicase A	1.60284e+07	0	0	0	4.83119	2	2										1270	140.869	2.05
IPI00013452.11	Bifunctional aminoacyl-tRNA synthetase	0	0	2.72729e+07	0							6.48176	2	2				1512	170.483	1.92

## Sheet: ACV2 -> ALDH1A1
		Area		Control			ACV2			General information
Accession	Description	Control	ACV2	Score A2	# Peptides A2	# PSM A2	Score B2	# Peptides B2	# PSM B2	# AAs	MW [kDa]	ΣCoverage
IPI01020686.1	Uncharacterized protein	5.68166e+08	0	233.539	19	67				435	48.4876	69.89
IPI00007752.1	Tubulin beta-2C chain	5.68166e+08	0	236.839	19	69				445	49.799	68.31
IPI00893541.1	14 kDa protein	0	6.31043e+08				52.8125	6	17	123	13.5108	60.16
IPI01014382.2	Uncharacterized protein	1.72193e+09	8.51598e+07	303.386	23	95	35.1326	11	12	490	54.2526	59.8
IPI00218914.5	Retinal dehydrogenase 1	6.4029e+07	7.03693e+08	30.5531	8	9	182.188	21	59	501	54.827	58.48
IPI00006663.1	Aldehyde dehydrogenase, mitochondrial	3.11725e+08	2.72794e+08	148.6	20	45	40.5737	10	14	517	56.3456	58.03
IPI00031420.3	UDP-glucose 6-dehydrogenase	9.90536e+06	2.50787e+08				116	20	36	494	54.9893	54.45
IPI00930688.1	Tubulin alpha-1B chain	7.05054e+08	9.19882e+07	135.807	16	39	29.9015	8	10	451	50.1196	53.88
IPI00025252.1	Protein disulfide-isomerase A3	1.14123e+07	7.84454e+08				232.49	22	77	505	56.7468	52.28
IPI00218343.4	Tubulin alpha-1C chain	7.05054e+08	9.19882e+07	127.656	15	38	32.3582	9	11	449	49.8635	50.33
IPI00789370.3	serine hydroxymethyltransferase, mitochondrial isoform 3	2.85435e+08	1.69136e+07	102.671	13	32				483	53.4214	43.27
IPI00784154.1	60 kDa heat shock protein, mitochondrial	3.2398e+07	1.78056e+08	43.3776	7	13	183.821	14	53	573	61.0164	42.23
IPI00009865.4	Keratin, type I cytoskeletal 10	1.61606e+08	1.38572e+08	85.9431	17	26	60.4517	13	19	584	58.7917	40.07
IPI00019359.4	Keratin, type I cytoskeletal 9	6.6848e+07	4.45487e+07	27.3977	7	7	29.3424	4	6	623	62.0268	37.4
IPI00297779.7	T-complex protein 1 subunit beta	1.29058e+08	0	80.9263	15	23				535	57.4521	37.38
IPI00789806.2	Isoform 2 of Cytosol aminopeptidase	1.33108e+08	0	58.1741	13	19				488	52.7379	36.89
IPI00963899.3	cDNA FLJ38173 fis, clone FCBBF1000053, highly similar to HYDROXYMETHYLGLUTARYL-COA SYNTHASE, CYTOPLASMIC	1.26884e+07	1.59079e+08				85.9093	14	29	509	56.2029	36.15
IPI00945130.1	Uncharacterized protein	0	1.05525e+08				59.5901	13	20	482	52.3898	35.48
IPI00010796.1	Protein disulfide-isomerase	1.12895e+07	1.22214e+08	8.46834	2	3	88.8966	15	29	508	57.0807	34.84
IPI00013683.2	Tubulin beta-3 chain	5.58489e+08	0	126.326	11	37				450	50.4003	33.33
IPI00179964.5	Isoform 1 of Polypyrimidine tract-binding protein 1	6.98359e+07	5.72407e+07	43.224	8	12	24.9595	6	8	531	57.1856	30.89
IPI00220327.4	Keratin, type II cytoskeletal 1	1.81312e+08	1.21262e+08	95.4671	17	29	49.3371	11	14	644	65.999	29.19
IPI00103467.5	Aldehyde dehydrogenase X, mitochondrial	2.45087e+08	3.29014e+08	77.2768	11	22				517	57.1702	28.63
IPI00021304.1	Keratin, type II cytoskeletal 2 epidermal	1.48673e+08	6.28281e+07	41.9128	9	13	58.5433	12	17	645	65.8254	26.98
IPI00440493.2	ATP synthase subunit alpha, mitochondrial	1.75866e+08	0	71.4474	11	20				553	59.7136	26.94
IPI00936002.1	Isoform 2 of Alpha-aminoadipic semialdehyde dehydrogenase	1.32118e+08	0	41.986	10	12				511	55.3315	26.22
IPI00953696.1	glutathione reductase, mitochondrial isoform 4 precursor	1.28834e+08	0	33.851	7	11				440	47.2372	26.14
IPI01025367.1	56 kDa protein	2.03079e+07	9.90846e+07	11.9651	4	5	39.9484	12	15	522	56.1917	25.67
IPI00152432.2	Isoform 1 of Alanine aminotransferase 2	6.20285e+07	0	44.7771	9	14				523	57.8664	25.24
IPI00009662.2	Isoform 1 of 5'-nucleotidase domain-containing protein 2	1.61697e+07	5.97579e+07				31.9667	10	12	520	60.6797	23.85
IPI00019888.1	Succinate-semialdehyde dehydrogenase, mitochondrial	8.36149e+07	1.46849e+07	42.4703	8	13	8.82969	2	3	535	57.1783	23.74
IPI01011421.2	Dihydrolipoyl dehydrogenase	0	8.74857e+07				34.7849	8	11	459	48.8503	23.09
IPI00030320.4	Probable ATP-dependent RNA helicase DDX6	6.29872e+07	0	40.9318	8	12				483	54.3823	22.57
IPI01010177.1	cDNA FLJ51879, highly similar to Prenylcysteine oxidase	1.64931e+07	6.42749e+07				24.6574	9	9	427	48.3444	22.48
IPI00011200.5	D-3-phosphoglycerate dehydrogenase	3.88521e+07	4.75089e+07	22.9318	7	8	26.1959	7	8	533	56.6144	22.33
IPI00216951.2	Aspartyl-tRNA synthetase, cytoplasmic	7.70471e+07	0	35.8453	9	12				501	57.1	21.36
IPI00514561.1	cDNA FLJ54552, highly similar to Heterogeneous nuclear ribonucleoprotein K	0	7.03361e+07				34.468	7	11	428	47.5276	21.26
IPI00965713.3	fibrinogen beta chain isoform 2 preproprotein	0	5.48565e+07				33.547	7	11	432	49.9232	21.06
IPI00026530.4	Protein ERGIC-53	1.08407e+08	4.68142e+07	23.3823	6	7	5.4311	2	2	510	57.513	16.67
IPI00645966.1	Uncharacterized protein	9.28195e+06	3.05975e+06	6.77825	2	2	7.89824	2	2	207	23.6583	16.43
IPI00177728.3	Isoform 1 of Cytosolic non-specific dipeptidase	4.0628e+07	0	18.4775	5	6				475	52.8449	16.21
IPI00908881.3	Glucose-6-phosphate isomerase	0	9.10667e+07				34.9007	6	11	531	59.9526	15.25
IPI01015038.1	T-complex protein 1 subunit delta	0	7.2964e+07				23.7692	6	8	483	52.2979	14.49
IPI00552590.1	T-complex protein 1 subunit zeta isoform b	2.79166e+07	0	15.0764	5	5				486	53.2551	14.2
IPI00166749.3	Mitochondrial-processing peptidase subunit alpha	2.80466e+07	0	18.7384	5	6				525	58.2156	14.1
IPI00027424.3	Isoform 1 of Glycerol kinase	0	3.44086e+07				19.4519	6	7	524	57.4521	13.93
IPI00784044.1	Isoform 1 of Methylcrotonoyl-CoA carboxylase beta chain, mitochondrial	0	2.56459e+07				14.0134	5	5	563	61.2944	13.14
IPI00980668.1	Putative uncharacterized protein DKFZp686A15170	1.10121e+07	0	6.73616	2	2				277	30.4745	13
IPI01011410.1	Uncharacterized protein	0	1.93815e+07				12.7205	2	4	214	23.1182	11.68
IPI01009563.1	Adenylyl cyclase-associated protein	0	3.74385e+07				13.2214	4	4	452	49.2774	11.5
IPI00004968.1	Pre-mRNA-processing factor 19	0	5.94648e+07				13.0872	4	5	504	55.1463	11.11
IPI00550689.3	tRNA-splicing ligase RtcB homolog	0	2.91156e+07				15.5536	5	6	505	55.1749	10.89
IPI00604713.6	cDNA FLJ41699 fis, clone HCHON2004776, highly similar to Homo sapiens cytoskeleton-associated protein 4 (CKAP4), mRNA	0	2.09798e+07				10.8967	4	4	521	58.1158	10.75
IPI00215687.1	Isoform 3 of Glutaminase kidney isoform, mitochondrial	0	6.96022e+07				28.5178	4	8	598	65.4179	10.37
IPI00289800.7	Isoform Short of Glucose-6-phosphate 1-dehydrogenase	8.27331e+06	1.22852e+07	5.01216	2	2	4.77998	2	2	515	59.219	10.1
IPI00299402.1	Pyruvate carboxylase, mitochondrial	5.33766e+07	2.0576e+07	33.3197	8	10	8.54992	3	3	1178	129.551	9.93
IPI00395676.1	Isoform 2 of UTP--glucose-1-phosphate uridylyltransferase	5.30532e+07	0	15.3675	4	5				497	55.6421	9.46
IPI00006510.1	Tubulin beta-1 chain	3.37342e+08	0	25.146	3	9				451	50.2946	9.09
IPI00465436.4	Catalase	2.04804e+07	1.63701e+07	5.73847	2	2	11.6299	4	4	527	59.7188	8.92
IPI00909399.2	xaa-Pro dipeptidase isoform 3	0	2.57365e+07				11.1054	3	4	429	47.2304	8.39
IPI01012403.1	cDNA, FLJ79105, highly similar to Phosphoenolpyruvate carboxykinase (GTP), mitochondrial	2.17587e+07	0	8.8532	3	3				506	55.917	7.91
IPI00420108.6	Dihydrolipoyllysine-residue succinyltransferase component of 2-oxoglutarate dehydrogenase complex, mitochondrial	4.07439e+07	0	8.48434	3	3				453	48.7245	7.28
IPI00020599.1	Calreticulin	0	2.63709e+07				7.7788	2	3	417	48.1118	6.47
IPI00952607.1	T-complex protein 1 subunit eta isoform d	0	1.96266e+07				7.43045	3	3	499	54.7695	6.21
IPI00465170.1	Isoform 1 of 5'-nucleotidase domain-containing protein 3	0	8.8154e+06				8.59529	3	3	548	63.3791	6.02
IPI00798401.2	cDNA FLJ50992, highly similar to Coronin-1C	0	1.38348e+07				7.73673	2	3	437	49.3471	5.72
IPI00798375.2	cDNA FLJ59357, highly similar to Probable ATP-dependent RNA helicase DDX5	2.4574e+07	3.69497e+07				10.6195	3	4	544	61.4779	5.33
IPI00296645.5	Microsomal triglyceride transfer protein large subunit	0	2.12859e+07				11.2731	3	4	894	99.2888	4.81
IPI01012526.1	Uncharacterized protein	2.42004e+07	1.03415e+07	14.1063	2	3	16.3127	3	4	847	96.1558	4.25
IPI00218977.1	Isoform D of Formimidoyltransferase-cyclodeaminase	0	1.51716e+07				5.85498	2	2	495	52.732	4.24
IPI00909570.1	cDNA FLJ56548, highly similar to Elongation factor 2	9.66503e+06	0	5.5502	2	2				566	62.81	4.06
IPI00410017.1	Isoform 2 of Polyadenylate-binding protein 1	0	1.69602e+07				4.95333	2	2	547	61.142	3.29
IPI00642156.1	Probable glutamyl-tRNA synthetase, mitochondrial	2.68805e+07	0	5.04611	2	2				523	58.6516	3.25
IPI00218547.1	Isoform Short of Delta-1-pyrroline-5-carboxylate synthase	5.72328e+06	1.11474e+07				5.58302	2	2	793	87.0344	3.15

## Sheet: ACV2 -> ALDH1A1, ALDH2
		Area				Control (1)			Control (2)			ACV2 (1)			ACV2 (2)			General information
Accession	Description	Control (1)	Control (2)	ACV2 (1)	ACV2 (2)	Score A2	# Peptides A2	# PSM A2	Score B2	# Peptides B2	# PSM B2	Score C2	# Peptides C2	# PSM C2	Score D2	# Peptides D2	# PSM D2	# AAs	MW [kDa]	ΣCoverage
IPI00031420.3	UDP-glucose 6-dehydrogenase	1.32672e+08	1.7716e+09	2.50787e+08	1.82938e+08	75.2548	16	24	163.861	25	49	116	20	36	23.0567	7	7	494	54.9893	74.49
IPI00218914.5	Retinal dehydrogenase 1	3.5364e+08	5.3799e+07	7.03693e+08	2.82408e+09	120.433	18	38	12.9274	4	4	182.188	21	59	136.917	18	39	501	54.827	61.48
IPI00893541.1	14 kDa protein	8.50845e+08	8.13854e+08	6.31043e+08	5.35529e+09	51.899	7	18	19.1877	4	6	52.8125	6	17	47.9272	6	14	123	13.5108	60.16
IPI00784154.1	60 kDa heat shock protein, mitochondrial	7.11807e+07	1.23637e+09	1.78056e+08	7.41137e+08	116.033	13	31	143.25	18	40	183.821	14	53	688.913	25	184	573	61.0164	58.64
IPI00025252.1	Protein disulfide-isomerase A3	1.10808e+09	9.6627e+08	7.84454e+08	6.0048e+09	241.64	24	79	100.69	20	31	232.49	22	77	195.444	23	64	505	56.7468	56.63
IPI00010796.1	Protein disulfide-isomerase	1.58329e+07	2531534200	1.22214e+08	1.29124e+08	14.5382	3	4	275.226	20	77	88.8966	15	29	26.9377	8	9	508	57.0807	56.1
IPI00220327.4	Keratin, type II cytoskeletal 1	4.26409e+08	2.12652e+09	1.21262e+08	1.21033e+09	137.388	22	39	266.477	28	73	49.3371	11	14	115.632	17	29	644	65.999	54.97
IPI00007247.4	Propionyl-CoA carboxylase beta chain, mitochondrial	2.28047e+08	1.54539e+08	1.05525e+08	3.71069e+08	123.665	20	39	41.2669	11	13	59.5901	13	20	53.7678	14	17	539	58.1788	51.39
IPI00019359.4	Keratin, type I cytoskeletal 9	5.33068e+07	683450261	4.45487e+07	5.15431e+08	22.2833	5	5	129.262	19	35	29.3424	4	6	73.7704	13	19	623	62.0268	50.4
IPI00009865.4	Keratin, type I cytoskeletal 10	4.75141e+08	1.53548e+09	1.38572e+08	1.85307e+09	184.546	23	53	155.686	23	46	60.4517	13	19	92.0974	16	28	584	58.7917	49.49
IPI01015038.1	T-complex protein 1 subunit delta	0	5.52719e+08	7.2964e+07	7.07406e+07				85.3058	16	25	23.7692	6	8	10.6402	3	3	483	52.2979	46.79
IPI00004968.1	Pre-mRNA-processing factor 19	9.30223e+07	1.65754e+08	5.94648e+07	2.97421e+08	38.0594	10	12	40.2538	9	12	13.0872	4	5	18.171	5	6	504	55.1463	46.23
IPI00006663.1	Aldehyde dehydrogenase, mitochondrial	0	0	2.72794e+08	1.01101e+09							40.5737	10	14	109.662	15	32	517	56.3456	45.45
IPI00021304.1	Keratin, type II cytoskeletal 2 epidermal	1.28912e+08	1.5327e+09	6.28281e+07	7.22629e+08	48.0988	11	15	99.565	21	30	58.5433	12	17	68.4695	14	20	645	65.8254	44.96
IPI01014382.2	Uncharacterized protein	7.548e+07	1.09415e+08	8.51598e+07	1.1286e+09	32.8639	10	12	19.7629	6	6	35.1326	11	12	114.905	18	35	490	54.2526	44.69
IPI00783118.2	5'-nucleotidase domain-containing protein 2 isoform 1	1.1275e+08	1.304e+08	5.97579e+07	7.38706e+07	60.7764	13	19	41.3574	11	13	31.9667	10	12	5.82978	2	2	557	64.1033	44.34
IPI00784044.1	Isoform 1 of Methylcrotonoyl-CoA carboxylase beta chain, mitochondrial	0	3.86145e+08	2.56459e+07	6.56455e+07				102.074	18	27	14.0134	5	5	12.8434	3	3	563	61.2944	43.16
IPI00479186.7	Isoform M2 of Pyruvate kinase isozymes M1/M2	0	2.82008e+08	0	7.08247e+07				63.7285	13	17				35.6668	6	8	531	57.9	42.75
IPI00218343.4	Tubulin alpha-1C chain	2.47456e+08	2.39795e+08	9.19882e+07	1.84792e+09	69.6198	10	21	26.4064	7	8	32.3582	9	11	102.235	12	31	449	49.8635	42.32
IPI00930688.1	Tubulin alpha-1B chain	2.47456e+08	2.39795e+08	9.19882e+07	1.84792e+09	73.8188	11	22	29.5296	8	9	29.9015	8	10	98.6514	11	30	451	50.1196	41.69
IPI01010177.1	cDNA FLJ51879, highly similar to Prenylcysteine oxidase	8.85922e+07	3.98282e+08	6.42749e+07	7.68727e+08	33.4669	9	12	49.6846	11	15	24.6574	9	9	66.931	13	21	427	48.3444	41.45
IPI00011200.5	D-3-phosphoglycerate dehydrogenase	1.68169e+08	8.10407e+07	4.75089e+07	8.62168e+08	90.9909	13	29	22.6186	7	7	26.1959	7	8	71.7048	13	21	533	56.6144	40.71
IPI00298497.3	Fibrinogen beta chain	3.91125e+07	2.54805e+08	5.48565e+07	4.472e+08	18.2635	5	6	59.7118	13	17	33.547	7	11	33.4075	8	10	491	55.8923	38.9
IPI00607693.2	liver carboxylesterase 1 isoform c precursor	0	5.70642e+08	0	6.05212e+07				104.171	17	29				12.7395	4	4	566	62.3531	38.69
IPI00465436.4	Catalase	0	7.11418e+08	1.63701e+07	7.7702e+07				83.1009	15	24	11.6299	4	4	22.6098	7	7	527	59.7188	37.76
IPI00909059.5	cDNA FLJ53910, highly similar to Keratin, type II cytoskeletal 6A	8.10815e+07	2.03534e+08	1.32606e+07	4.19483e+08	25.0004	5	8	60.1173	15	19	11.2922	2	3	50.8363	13	16	535	57.8032	37.2
IPI00963899.3	cDNA FLJ38173 fis, clone FCBBF1000053, highly similar to HYDROXYMETHYLGLUTARYL-COA SYNTHASE, CYTOPLASMIC	2.55064e+08	2.0755e+08	1.59079e+08	9.52145e+08	75.8481	14	25	30.8545	8	9	85.9093	14	29	88.0538	14	24	509	56.2029	36.94
IPI00514561.1	cDNA FLJ54552, highly similar to Heterogeneous nuclear ribonucleoprotein K	7.80053e+07	1.17099e+08	7.03361e+07	3.62638e+08	40.3966	9	11	37.7992	8	10	34.468	7	11	48.9056	8	14	428	47.5276	35.98
IPI00009867.3	Keratin, type II cytoskeletal 5	1.1447e+08	2.04507e+08	2.92385e+07	2.78679e+08	40.9353	9	12	48.2749	12	18	9.17945	2	3	29.4499	9	10	590	62.34	35.93
IPI00550689.3	tRNA-splicing ligase RtcB homolog	2.07735e+07	1.27858e+08	2.91156e+07	7.60439e+07	7.65498	2	3	34.3928	11	11	15.5536	5	6	11.0894	4	4	505	55.1749	34.06
IPI00910738.1	cDNA FLJ60647, highly similar to Keratin, type II cytoskeletal 6B	6.1741e+07	1.9637e+08	1.32606e+07	3.15569e+08	25.34	6	8	42.6056	11	13	11.2922	2	3	41.2087	11	13	526	55.6981	33.65
IPI00152432.2	Isoform 1 of Alanine aminotransferase 2	4.01165e+07	0	0	3.02002e+08	39.4296	8	13							40.4401	10	13	523	57.8664	33.08
IPI00952607.1	T-complex protein 1 subunit eta isoform d	0	5.69317e+08	1.96266e+07	0				62.4588	11	17	7.43045	3	3				499	54.7695	32.06
IPI00217871.4	Delta-1-pyrroline-5-carboxylate dehydrogenase, mitochondrial	0	1.382e+08	1.93815e+07	1.4722e+08				36.8891	10	11	12.7205	2	4	23.7839	7	7	563	61.6806	31.62
IPI00410017.1	Isoform 2 of Polyadenylate-binding protein 1	0	2.86054e+08	1.69602e+07	6.86257e+07				67.6771	12	21	4.95333	2	2	11.8424	4	4	547	61.142	30.71
IPI00257882.7	Xaa-Pro dipeptidase	6.76969e+07	1.41648e+08	2.57365e+07	1.1204e+08	36.3296	8	11	19.7778	5	6	11.1054	3	4	13.594	3	4	493	54.5129	30.02
IPI01025367.1	56 kDa protein	1.14073e+08	5.63913e+07	9.90846e+07	7.78677e+08	39.9466	13	14	8.66985	3	3	39.9484	12	15	51.7896	10	17	522	56.1917	29.69
IPI00936002.1	Isoform 2 of Alpha-aminoadipic semialdehyde dehydrogenase	0	0	0	7.01516e+08										62.2672	12	19	511	55.3315	29.16
IPI00302925.4	59 kDa protein	0	1.42182e+08	0	0				40.9094	14	14							547	59.4404	28.88
IPI00215687.1	Isoform 3 of Glutaminase kidney isoform, mitochondrial	4.67412e+07	1.72001e+08	6.96022e+07	3.00108e+08	14.8068	4	4	45.644	9	12	28.5178	4	8	37.1349	7	10	598	65.4179	27.93
IPI01022236.1	Uncharacterized protein	0	0	0	4.10338e+08										56.7444	9	18	415	46.4805	27.47
IPI00304596.3	Non-POU domain-containing octamer-binding protein	0	1.51084e+08	3.05975e+06	0				41.4767	8	14	7.89824	2	2				471	54.1973	27.39
IPI00384444.6	Keratin, type I cytoskeletal 14	1.03366e+07	1.20616e+08	0	7.70376e+07	10.586	3	4	42.3603	10	15				13.4218	4	4	472	51.5294	26.27
IPI01022121.1	Uncharacterized protein	8.77968e+06	0	0	1.66497e+08	14.956	3	4							16.839	5	5	416	44.7846	26.2
IPI00883950.1	Similar to cytoskeleton-associated protein 4 (Fragment)	2.25385e+07	3.91054e+07	2.09798e+07	6.74449e+07	7.22044	3	3	13.2667	4	4	10.8967	4	4	15.8544	5	5	560	62.023	26.07
IPI00179964.5	Isoform 1 of Polypyrimidine tract-binding protein 1	9.1698e+07	1.97198e+08	5.72407e+07	2.45377e+08	42.1045	8	12	29.0331	6	8	24.9595	6	8	9.17895	3	3	531	57.1856	25.8
IPI00007752.1	Tubulin beta-2C chain	1.49886e+07	0	0	4.5579e+08	6.2107	2	2							52.3339	9	17	445	49.799	25.62
IPI00027424.3	Isoform 1 of Glycerol kinase	4.14153e+07	8.46598e+07	3.44086e+07	2.13553e+08	15.8042	5	6	19.1812	6	6	19.4519	6	7	27.6344	7	9	524	57.4521	25.57
IPI01011421.2	Dihydrolipoyl dehydrogenase	4.32728e+07	6.60574e+08	8.74857e+07	1.66721e+08	27.7679	7	8	65.3018	7	16	34.7849	8	11	19.8186	4	5	459	48.8503	25.49
IPI00798375.2	cDNA FLJ59357, highly similar to Probable ATP-dependent RNA helicase DDX5	4.39753e+07	1.8315e+08	3.69497e+07	2.23453e+08	14.4221	3	5	35.5687	12	13	10.6195	3	4	24.215	9	9	544	61.4779	24.82
IPI00412737.1	tryptophanyl-tRNA synthetase, cytoplasmic isoform b	2.42939e+07	0	0	5.64439e+07	18.471	5	5							19.0328	5	5	430	48.8204	24.65
IPI00908881.3	Glucose-6-phosphate isomerase	1.55675e+08	4.13276e+08	9.10667e+07	8.23933e+08	50.4458	7	16	71.1624	8	20	34.9007	6	11	63.8184	8	19	531	59.9526	24.29
IPI00103467.5	Aldehyde dehydrogenase X, mitochondrial	0	0	0	3.42406e+08										54.7475	10	16	517	57.1702	23.4
IPI00217963.3	Keratin, type I cytoskeletal 16	0	1.06608e+08	0	1.416e+08				39.1199	9	14				12.0126	4	4	473	51.2362	22.83
IPI00289800.7	Isoform Short of Glucose-6-phosphate 1-dehydrogenase	3.46266e+07	0	1.22852e+07	2.35609e+08	15.7838	6	6				4.77998	2	2	25.2285	8	9	515	59.219	22.14
IPI00946558.1	Uncharacterized protein	3.75599e+07	0	1.46849e+07	4.80489e+08	19.0989	4	7				8.82969	2	3	30.2865	8	9	507	53.8335	21.7
IPI00291510.3	Inosine-5'-monophosphate dehydrogenase 2	4.22789e+07	0	0	1.21704e+08	19.101	5	5							35.8021	8	10	514	55.7696	21.01
IPI00789806.2	Isoform 2 of Cytosol aminopeptidase	0	0	0	9.85195e+08										26.4543	8	9	488	52.7379	20.7
IPI00013683.2	Tubulin beta-3 chain	1.49886e+07	0	0	4.10338e+08	6.2107	2	2							42.8944	7	13	450	50.4003	20.67
IPI00607732.1	Isoform 2 of Nicalin	0	6.95615e+07	0	0				26.8755	8	8							562	62.8065	20.64
IPI00020599.1	Calreticulin	2.7259e+07	7.79402e+07	2.63709e+07	1.06018e+08	7.41394	2	3	24.9769	4	7	7.7788	2	3	9.46006	3	3	417	48.1118	20.62
IPI00011126.6	26S protease regulatory subunit 4	0	9.4721e+07	0	0				22.6658	6	6							440	49.1537	20.23
IPI01009563.1	Adenylyl cyclase-associated protein	2.52314e+07	1.22862e+08	3.74385e+07	2.31541e+08	12.4325	4	4	13.3906	4	4	13.2214	4	4	22.8667	5	7	452	49.2774	19.47
IPI00006713.1	DnaJ homolog subfamily C member 3	3.43535e+07	0	0	2.34841e+08	10.5535	2	4							26.7931	7	8	504	57.5442	19.44
IPI00220637.5	Seryl-tRNA synthetase, cytoplasmic	0	116011761	0	0				30.827	8	9							514	58.7401	19.26
IPI01021659.1	23 kDa protein	0	3.13e+07	0	0				9.22254	3	3							198	23.4028	19.19
IPI01015091.1	Uncharacterized protein	0	0	0	1.15573e+07										7.52469	2	2	187	20.4135	18.72
IPI00551024.5	Bifunctional ATP-dependent dihydroxyacetone kinase/FAD-AMP lyase (cyclizing)	0	3.706e+07	0	2.37872e+07				10.3156	3	3				13.9279	4	4	575	58.91	18.26
IPI00639945.1	Protein	0	0	0	4.47396e+07										8.15187	3	3	161	18.3133	18.01
IPI00026530.4	Protein ERGIC-53	1.36674e+08	0	4.68142e+07	2.68121e+08	28.7395	7	9				5.4311	2	2	22.4578	6	7	510	57.513	17.25
IPI00219005.3	Peptidyl-prolyl cis-trans isomerase FKBP4	0	0	0	1.13334e+08										17.2724	5	5	459	51.7721	17.21
IPI01011344.1	Uncharacterized protein	5.11066e+07	1.22364e+08	0	2.17345e+08	5.71056	2	2	15.1094	4	5				11.4236	2	3	333	37.3826	17.12
IPI00917399.1	Uncharacterized protein	0	0	0	7.0965e+07										5.3582	2	2	176	19.9566	17.05
IPI00001441.3	Isoform A of Formimidoyltransferase-cyclodeaminase	0	5.85056e+07	1.51716e+07	2.5497e+07				16.3199	6	6	5.85498	2	2	5.80331	2	2	541	58.8894	17.01
IPI01012403.1	cDNA, FLJ79105, highly similar to Phosphoenolpyruvate carboxykinase (GTP), mitochondrial	0	6.46532e+07	0	2.53463e+07				20.8827	5	6				6.2508	2	2	506	55.917	17
IPI00465170.1	Isoform 1 of 5'-nucleotidase domain-containing protein 3	3.29675e+07	0	8.8154e+06	9.99405e+07	22.9998	6	8				8.59529	3	3	14.3672	5	5	548	63.3791	16.79
IPI00332828.1	cocaine esterase isoform 1	0	2.18894e+08	0	0				36.6401	8	12							623	68.8548	16.21
IPI00450768.7	Keratin, type I cytoskeletal 17	6.50162e+06	6.90891e+07	0	3.58428e+07	6.16472	2	2	9.87969	3	3				11.8394	3	3	432	48.076	15.74
IPI00788849.1	protein TFG isoform 2	0	0	0	8.24481e+07										11.2373	3	3	396	42.994	15.15
IPI00336016.3	Probable cysteinyl-tRNA synthetase, mitochondrial	3.94619e+07	4.29346e+07	0	1.24006e+08	17.5671	4	7	5.44864	2	2				12.7312	5	5	564	62.1847	15.07
IPI00166395.5	Isoform 1 of Acyl-CoA synthetase family member 3, mitochondrial	0	9.63522e+07	0	0				18.727	6	6							576	64.0893	14.06
IPI00941463.1	Nucleosome assembly protein 1-like 4	0	6.68664e+07	0	0				12.8846	4	4							375	42.7969	13.87
IPI00984387.1	cDNA FLJ53166, highly similar to Dihydropyrimidinase-related protein 2	0	5.20719e+07	0	0				12.7069	4	4							536	58.1264	13.43
IPI00296645.5	Microsomal triglyceride transfer protein large subunit	0	0	2.12859e+07	273297009							11.2731	3	4	33.7789	10	11	894	99.2888	13.42
IPI00916535.1	prolyl 4-hydroxylase subunit alpha-1 isoform 3 precursor	0	6.32744e+07	0	0				17.3321	5	5							516	58.921	13.18
IPI01012526.1	Uncharacterized protein	1.61074e+07	7.98595e+07	1.03415e+07	4.71366e+07	17.3404	3	4	24.8997	6	7	16.3127	3	4	6.546	2	2	847	96.1558	12.99
IPI00927191.2	Isoform 3 of Beta-galactosidase	0	1.41522e+08	0	0				20.9236	6	7							647	72.7045	12.36
IPI00916188.1	32 kDa protein	0	3.71687e+07	0	0				9.00229	3	3							297	32.4271	12.12
IPI00943173.1	Coronin-1C	0	4.55272e+07	1.38348e+07	0				12.3631	4	4	7.73673	2	3				474	53.2151	11.81
IPI01025431.1	17 kDa protein	0	0	0	5.87663e+07										5.00231	2	2	161	17.4604	11.8
IPI00953696.1	glutathione reductase, mitochondrial isoform 4 precursor	0	0	0	1.90439e+08										10.8971	4	4	440	47.2372	10.68
IPI00554786.5	Isoform 5 of Thioredoxin reductase 1, cytoplasmic	0	6.25679e+07	0	0				18.6722	4	5							499	54.6719	10.42
IPI00909681.1	Serine hydroxymethyltransferase	0	4.68847e+07	0	1.54221e+08				8.30845	3	3				12.3504	4	4	430	47.8137	10.23
IPI00002214.1	Importin subunit alpha-2	1.84017e+07	0	0	8.57586e+07	9.83338	2	3							6.94454	2	2	529	57.8259	10.02
IPI00022648.2	Eukaryotic translation initiation factor 5	0	0	0	5.19923e+07										9.26142	4	4	431	49.1918	9.98
IPI01011335.1	cDNA FLJ60435, highly similar to Heterogeneous nuclear ribonucleoprotein M	0	3.62277e+07	0	6.26807e+07				5.95685	2	2				6.02579	2	2	366	39.1609	9.84
IPI00299402.1	Pyruvate carboxylase, mitochondrial	3.6852e+07	9.61785e+07	2.0576e+07	0	20.6101	5	7	26.6585	6	7	8.54992	3	3				1178	129.551	9.42
IPI00910614.1	heterogeneous nuclear ribonucleoprotein R isoform 4	0	5.13923e+07	0	4.77784e+07				8.30358	3	3				8.13961	3	3	532	59.6447	9.4
IPI01013273.1	cDNA, FLJ79129, highly similar to T-complex protein 1 subunit zeta	0	0	0	4.91634e+07										8.02337	3	3	500	54.8328	9.4
IPI00909914.3	cDNA FLJ50884, highly similar to Beta-hexosaminidase alpha chain	0	0	0	4.78201e+07										10.6989	2	3	301	34.557	9.3
IPI00883598.3	Uncharacterized protein	0	5.20202e+07	0	0				9.81447	3	3							494	53.533	9.11
IPI00006510.1	Tubulin beta-1 chain	1.9969e+07	0	0	3.37665e+08	6.10409	2	2							11.4253	2	4	451	50.2946	9.09
IPI00465044.2	Protein RCC2	0	6.1975e+07	0	0				10.6493	4	4							522	56.0492	9
IPI01010979.1	Uncharacterized protein	0	0	0	3.51475e+07										7.59405	2	2	392	44.864	8.93
IPI00029534.1	Amidophosphoribosyltransferase	0	4.92565e+07	0	0				8.34876	3	3							517	57.3624	8.7
IPI00032220.3	Angiotensinogen	0	0	0	5.61693e+07										10.8128	3	3	485	53.1205	8.66
IPI00915274.1	H/ACA ribonucleoprotein complex subunit 4 isoform 2	0	1.71404e+07	0	0				9.25566	3	3							509	56.9965	8.64
IPI00027230.3	Endoplasmin	0	6.14245e+07	0	9.32947e+07				33.8519	3	10				6.11466	2	2	803	92.4113	8.59
IPI00965269.1	cDNA, FLJ79275, highly similar to T-complex protein 1 subunit epsilon	0	1.89718e+07	0	1.10854e+07				10.6496	3	3				6.79188	2	2	503	55.3136	8.55
IPI00921588.1	dimethylaniline monooxygenase [N-oxide-forming] 5 isoform 2	0	6.71858e+07	0	0				10.2524	3	3							464	52.443	8.41
IPI00007812.1	V-type proton ATPase subunit B, brain isoform	0	0	0	8.27166e+07										9.65322	3	3	511	56.4649	8.02
IPI01021250.1	Protein	0	0	0	1.56558e+07										6.05231	2	2	362	38.2249	8.01
IPI00027834.3	Heterogeneous nuclear ribonucleoprotein L	0	4.47342e+07	0	0				9.3361	3	3							589	64.0924	7.98
IPI00895869.1	Isoform 2 of Propionyl-CoA carboxylase alpha chain, mitochondrial	0	4.0337e+07	0	0				12.0851	4	4							702	76.9986	7.98
IPI00793942.4	serine/threonine-protein phosphatase 5 isoform 2	0	4.01723e+07	0	0				10.3776	3	3							477	54.3908	7.97
IPI00029764.1	Splicing factor 3A subunit 3	0	3.21089e+07	0	0				7.06209	2	2							501	58.8123	7.78
IPI00471928.6	ATP synthase subunit alpha	0	0	0	5.8495e+07										9.17691	3	3	503	54.4597	7.75
IPI00795694.1	Isoform 2 of Acyl-CoA synthetase short-chain family member 3, mitochondrial	0	1.61377e+07	0	0				5.53293	2	2							368	40.3006	7.61
IPI00922694.2	Uncharacterized protein	0	3.14004e+07	0	0				11.8848	4	4							632	69.8831	7.44
IPI00019988.1	N-sulphoglucosamine sulphohydrolase	0	2.81577e+07	0	0				10.6001	3	4							502	56.6595	7.37
IPI00414696.1	Isoform A2 of Heterogeneous nuclear ribonucleoproteins A2/B1	0	0	0	165427858										5.49763	2	2	341	35.9839	7.33
IPI00218547.1	Isoform Short of Delta-1-pyrroline-5-carboxylate synthase	0	4.98755e+07	1.11474e+07	0				6.63702	2	2	5.58302	2	2				793	87.0344	7.31
IPI00980998.2	cDNA FLJ57232, highly similar to Lysosomal Pro-X carboxypeptidase	0	0	0	5.09522e+07										6.44826	2	2	391	43.9056	6.65
IPI00028229.6	UDP-glucuronosyltransferase 2A3	0	0	0	1.85655e+07										11.7222	3	4	527	60.215	6.64
IPI01015222.1	cDNA FLJ54259, highly similar to Smu-1 suppressor of mec-8 and unc-52 protein homolog	0	0	0	2.42342e+07										5.93452	2	2	352	39.3177	6.53
IPI00642416.1	60 kDa SS-A/Ro ribonucleoprotein isoform 4	0	3.52488e+07	0	0				7.94836	3	3							518	58.4452	6.37
IPI00909829.1	Pyruvate kinase	0	8.15473e+06	0	0				7.33306	2	2							488	52.5846	6.15
IPI00514894.2	Uncharacterized protein	0	2.23752e+07	0	0				5.72594	2	2							344	38.4589	6.1
IPI00017297.1	Matrin-3	0	3.20306e+07	0	0				10.1842	3	3							847	94.5648	5.9
IPI00909657.1	cDNA FLJ50378, highly similar to Phenylalanyl-tRNA synthetase alpha chain	0	3.19183e+07	0	0				7.60144	2	2							477	54.1238	5.66
IPI00155054.3	cDNA FLJ50635, highly similar to ATP-dependent RNA helicase DDX19A	0	3.06847e+07	0	0				6.87484	2	2							447	50.402	5.59
IPI00099463.2	Sphingosine-1-phosphate lyase 1	0	4.31705e+07	0	0				6.02333	2	2							568	63.4827	5.46
IPI00218435.1	Isoform 2 of U4/U6 small nuclear ribonucleoprotein Prp4	0	3.08398e+07	0	0				6.02039	2	2							521	58.2843	5.37
IPI01015738.1	Uncharacterized protein	0	2.56865e+07	0	0				8.96547	3	3							692	79.8635	5.2
IPI00641873.1	Uncharacterized protein	0	6.28109e+06	0	0				6.58945	2	2							494	54.6745	5.06
IPI00910365.1	cDNA FLJ53237, highly similar to Caseinolytic peptidase B protein	0	5.64655e+07	0	0				8.07755	3	3							662	74.4424	4.83
IPI00165261.6	Sec1 family domain-containing protein 1	0	3.32835e+07	0	0				9.24569	2	3							642	72.3341	4.67
IPI01008932.1	cDNA FLJ53870, highly similar to 24-dehydrocholesterol reductase	0	0	0	1.83792e+08										5.28958	2	2	475	54.7145	4.63
IPI00383680.3	dolichyl-diphosphooligosaccharide--protein glycosyltransferase subunit 2 isoform 2 precursor	0	2.49503e+07	0	0				6.54475	2	2							615	67.6814	4.23
IPI00031661.1	Nucleolar complex protein 4 homolog	0	3.17686e+07	0	0				5.32978	2	2							516	58.4307	3.88
IPI00241238.3	retinal dehydrogenase 2 isoform 3	0	0	0	2.30529e+08										7.42513	2	3	422	46.1075	3.79
IPI00397801.4	Filaggrin-2	0	4.93026e+06	0	0				13.1963	3	3							2391	247.928	3.6
IPI00414676.6	Heat shock protein HSP 90-beta	0	0	0	8.72854e+07										5.99718	2	2	724	83.2121	3.59
IPI00985384.1	ATP-dependent RNA helicase DDX3X isoform 3	0	2.43923e+07	0	0				6.11474	2	2							646	71.3109	3.56
IPI00966751.1	CaM kinase II isoform	0	0	0	2.01025e+07										5.5492	2	2	610	67.8374	3.44
IPI00026781.3	Fatty acid synthase	0	3.55539e+07	0	0				19.6661	6	6							2511	273.254	3.03
IPI00186290.6	Elongation factor 2	0	4.40787e+07	0	0				5.36527	2	2							858	95.277	2.68
