# Supplementary material for: Target discovery of acivicin in cancer cells elucidates its mechanism of growth inhibition
Source: Chem Sci. 2014 Sep 16;6(1):237–45. doi: 10.1039/c4sc02339k (PMC4285139; doi:10.1039/c4sc02339k)
Supplement: Supplementary file 3 [file SC-006-C4SC02339K-s003.xlsx]

## Sheet: SILAC ACVL1 -> ALDH1A1
		ACVL1 / Control			General information
Accession	Description	A5: Heavy/Light	A5: Heavy/Light Count	A5: Heavy/Light Variability [%]	# AAs	MW [kDa]	ΣCoverage
IPI00019359.4;P35527	Keratin, type I cytoskeletal 9	0.0839078	1		623	62.0268	56.66
IPI00021304.1	Keratin, type II cytoskeletal 2 epidermal				645	65.8254	49.46
IPI00031420.3;O60701	UDP-glucose 6-dehydrogenase	0.820193	22	5.766	494	54.9893	47.57
IPI00025252.1;P30101	Protein disulfide-isomerase A3	0.799619	21	5.56042	505	56.7468	46.93
IPI00220327.4;P04264	Keratin, type II cytoskeletal 1	0.0378717	1		644	65.999	45.65
P35908	Keratin, type II cytoskeletal 2 epidermal OS=Homo sapiens GN=KRT2 PE=1 SV=2 - [K22E_HUMAN]				639	65.3932	45.54
IPI00009865.4;P13645	Keratin, type I cytoskeletal 10	0.0174891	1		584	58.7917	44.52
IPI00218914.5;P00352	Retinal dehydrogenase 1	10.4205	13	22.6782	501	54.827	41.12
IPI00007247.4;P05166	Propionyl-CoA carboxylase beta chain, mitochondrial	1.05561	18	5.41393	539	58.1788	40.82
IPI01019113.1;Q2KJD0	Tubulin beta chain	0.750337	11	3.91914	444	49.639	38.51
IPI00007752.1;Q3MHM5	Tubulin beta-2C chain	0.749032	10	2.50566	445	49.799	38.43
IPI00893541.1	14 kDa protein	0.819611	3	1.89522	123	13.5108	38.21
IPI00218343.4;Q9BQE3	Tubulin alpha-1C chain	0.853201	12	6.06177	449	49.8635	33.85
C3K6N0	Succinyl-CoA ligase [ADP-forming] subunit beta OS=Pseudomonas fluorescens (strain SBW25) GN=sucC PE=3 SV=1 - [SUCC_PSEFS]				388	41.2616	33.76
IPI00930688.1;P81947	Tubulin alpha-1B chain	0.854119	12	6.85757	451	50.1196	33.7
C3K2X8	Elongation factor Tu OS=Pseudomonas fluorescens (strain SBW25) GN=tuf PE=3 SV=1 - [EFTU_PSEFS]				397	43.5363	32.49
IPI00299145.9;P48668	Keratin, type II cytoskeletal 6C				564	59.9883	30.85
P00761	Trypsin OS=Sus scrofa PE=1 SV=1 - [TRYP_PIG]				231	24.3938	26.84
IPI00011200.5;O43175	D-3-phosphoglycerate dehydrogenase	0.772818	8	4.90933	533	56.6144	24.39
C3K1K0	GMP synthase [glutamine-hydrolyzing] OS=Pseudomonas fluorescens (strain SBW25) GN=guaA PE=3 SV=1 - [GUAA_PSEFS]				525	58.3979	23.43
C3K1E8	ATP synthase subunit alpha OS=Pseudomonas fluorescens (strain SBW25) GN=atpA PE=3 SV=1 - [ATPA_PSEFS]	0.0313314	2	56.9359	514	55.2446	22.18
IPI00009867.3;P13647	Keratin, type II cytoskeletal 5				590	62.34	21.36
P02701	Avidin OS=Gallus gallus GN=AVD PE=1 SV=3 - [AVID_CHICK]				152	16.7577	21.05
Q48BG5	ATP synthase subunit beta OS=Pseudomonas syringae pv. phaseolicola (strain 1448A / Race 6) GN=atpD PE=3 SV=1 - [ATPB_PSE14]				459	49.4914	18.3
C3K1E6	ATP synthase subunit beta OS=Pseudomonas fluorescens (strain SBW25) GN=atpD PE=3 SV=1 - [ATPB_PSEFS]				458	49.4594	17.69
IPI00027497.5;P06744	Glucose-6-phosphate isomerase	0.832795	4	0.624083	558	63.1072	16.31
IPI00384444.6;P02533	Keratin, type I cytoskeletal 14	0.780753	1		472	51.5294	15.04
B1JFU1	ATP synthase subunit beta OS=Pseudomonas putida (strain W619) GN=atpD PE=3 SV=1 - [ATPB_PSEPW]				458	49.3903	13.97
IPI00289800.7;P11413	Isoform Short of Glucose-6-phosphate 1-dehydrogenase	0.843425	5	13.6638	515	59.219	13.01
IPI00295400.1;P23381	Isoform 1 of Tryptophanyl-tRNA synthetase, cytoplasmic	0.820808	4	3.96933	471	53.1316	12.53
Q27710	Catalase OS=Onchocerca volvulus endobacterium GN=cat PE=2 SV=1 - [CATA_ONCVE]				482	53.6665	11.62
Q51342	Amidophosphoribosyltransferase OS=Pseudomonas aeruginosa GN=purF PE=3 SV=3 - [PUR1_PSEAE]				501	55.3353	11.38
P21219	High-molecular weight cobalt-containing nitrile hydratase subunit alpha OS=Rhodococcus rhodochrous GN=nhhA PE=1 SV=3 - [NHA1_RHORH]				203	22.8203	11.33
IPI00004968.1;Q9UMS4	Pre-mRNA-processing factor 19	0.754707	4	3.62471	504	55.1463	11.31
C3K5Z6	Elongation factor Ts OS=Pseudomonas fluorescens (strain SBW25) GN=tsf PE=3 SV=1 - [EFTS_PSEFS]				287	30.3411	11.15
IPI00297779.7;P78371	T-complex protein 1 subunit beta	2.08858	5	3.53951	535	57.4521	10.47
IPI00302927.6;P50991	T-complex protein 1 subunit delta	0.723255	4	6.37346	539	57.8878	10.39
P31052	Dihydrolipoamide dehydrogenase OS=Pseudomonas putida GN=lpdG PE=1 SV=4 - [DLDH2_PSEPU]				478	49.8651	9.83
IPI00010796.1;P07237	Protein disulfide-isomerase	0.718796	3	0.715319	508	57.0807	9.65
IPI00021439.1;P60712	Actin, cytoplasmic 1	0.684191	1		375	41.7097	9.07
Q3K4F5	Phosphate import ATP-binding protein PstB OS=Pseudomonas fluorescens (strain Pf0-1) GN=pstB PE=3 SV=1 - [PSTB_PSEPF]				277	31.1421	9.03
Q86YZ3	Hornerin OS=Homo sapiens GN=HRNR PE=1 SV=2 - [HORN_HUMAN]				2850	282.228	8.39
C3KDR8	Glucans biosynthesis protein D OS=Pseudomonas fluorescens (strain SBW25) GN=opgD PE=3 SV=1 - [OPGD_PSEFS]				541	60.4851	8.32
C3K4J5	Phosphoenolpyruvate carboxykinase [ATP] OS=Pseudomonas fluorescens (strain SBW25) GN=pckA PE=3 SV=1 - [PCKA_PSEFS]				513	55.3239	7.99
IPI00018465.1;Q99832	T-complex protein 1 subunit eta	0.606427	3	10.3548	543	59.3289	7.73
C3K3G6	Adenosylhomocysteinase OS=Pseudomonas fluorescens (strain SBW25) GN=ahcY PE=3 SV=1 - [SAHH_PSEFS]				469	51.212	7.25
C3KCT1	UDP-N-acetylmuramate--L-alanine ligase OS=Pseudomonas fluorescens (strain SBW25) GN=murC PE=3 SV=1 - [MURC_PSEFS]				481	52.1319	7.07
IPI00550689.3;Q9Y3I0	tRNA-splicing ligase RtcB homolog	0.793337	3	9.55258	505	55.1749	6.34
IPI00186290.6;P13639	Elongation factor 2	0.864241	5	6.12237	858	95.277	6.18
IPI00011126.6;P62191	26S protease regulatory subunit 4	0.878305	2	5.23992	440	49.1537	6.14
IPI00215888.4;O76094	Signal recognition particle 72 kDa protein	0.775454	3	5.72363	671	74.56	5.96
O87796	Fructose-bisphosphate aldolase OS=Pseudomonas stutzeri GN=fba PE=3 SV=1 - [ALF_PSEST]				354	38.3261	5.93
P14868	Aspartyl-tRNA synthetase, cytoplasmic OS=Homo sapiens GN=DARS PE=1 SV=2 - [SYDC_HUMAN]	0.778793	1		501	57.1	5.79
IPI00016801.1;P00367	Glutamate dehydrogenase 1, mitochondrial	0.721427	3	1.11103	558	61.3592	5.73
IPI00554786.5	Isoform 5 of Thioredoxin reductase 1, cytoplasmic	0.704383	2	27.1255	499	54.6719	5.21
IPI00215637.5;O00571	ATP-dependent RNA helicase DDX3X	0.864049	3	2.60803	662	73.198	4.98
P47203	Cell division protein ftsA OS=Pseudomonas aeruginosa GN=ftsA PE=3 SV=2 - [FTSA_PSEAE]				417	44.6181	4.8
IPI00784090.2;P50990	T-complex protein 1 subunit theta	0.356432	2	2.59522	548	59.5825	4.56
IPI00299402.1;P11498	Pyruvate carboxylase, mitochondrial	0.671758	3	0.69234	1178	129.551	4.33
P20580	Anthranilate synthase component 1 OS=Pseudomonas aeruginosa GN=trpE PE=3 SV=1 - [TRPE_PSEAE]				492	54.521	4.27
O57611	Keratin, type I cytoskeletal 18 OS=Scyliorhinus stellaris GN=krt18 PE=1 SV=1 - [K1C18_SCYST]				415	46.7629	3.86
C3JYR1	Glycine dehydrogenase [decarboxylating] OS=Pseudomonas fluorescens (strain SBW25) GN=gcvP PE=3 SV=1 - [GCSP_PSEFS]				946	102.176	3.49
P49591	Seryl-tRNA synthetase, cytoplasmic OS=Homo sapiens GN=SARS PE=1 SV=3 - [SYSC_HUMAN]	0.730171	1		514	58.7401	3.31
IPI00744115.1;P05165	Isoform 1 of Propionyl-CoA carboxylase alpha chain, mitochondrial	0.409047	2	22.194	728	80.0081	3.3
IPI00295851.4;P53618	Coatomer subunit beta	0.506973	2	55.5073	953	107.074	2.62

## Sheet: SILAC ACVL1 -> ALDH1B1, ALDH2
		ACVL1 / Control			General information
Accession	Description	A5: Heavy/Light	A5: Heavy/Light Count	A5: Heavy/Light Variability [%]	# AAs	MW [kDa]	ΣCoverage
IPI01019113.1;Q2KJD0	Tubulin beta chain	0.75892	23	3.86462	444	49.639	68.47
IPI00007752.1;Q3MHM5	Tubulin beta-2C chain	0.768713	20	3.78926	445	49.799	62.25
IPI00019359.4;P35527	Keratin, type I cytoskeletal 9				623	62.0268	59.07
IPI00220327.4;P04264	Keratin, type II cytoskeletal 1	0.0146412	1		644	65.999	57.92
IPI00009865.4;P13645	Keratin, type I cytoskeletal 10	0.0128432	2	28.3772	584	58.7917	57.02
IPI00021304.1	Keratin, type II cytoskeletal 2 epidermal				645	65.8254	55.5
P35908	Keratin, type II cytoskeletal 2 epidermal OS=Homo sapiens GN=KRT2 PE=1 SV=2 - [K22E_HUMAN]				639	65.3932	52.27
C3K2X8	Elongation factor Tu OS=Pseudomonas fluorescens (strain SBW25) GN=tuf PE=3 SV=1 - [EFTU_PSEFS]				397	43.5363	47.36
IPI00218343.4;Q9BQE3	Tubulin alpha-1C chain	0.832261	17	4.83922	449	49.8635	44.77
IPI00930688.1;P81947	Tubulin alpha-1B chain	0.827143	18	4.51946	451	50.1196	44.12
IPI00013683.2;Q2T9S0	Tubulin beta-3 chain	0.772843	18	5.7235	450	50.4003	41.56
C3K6N0	Succinyl-CoA ligase [ADP-forming] subunit beta OS=Pseudomonas fluorescens (strain SBW25) GN=sucC PE=3 SV=1 - [SUCC_PSEFS]				388	41.2616	39.95
C3JYK1	Trigger factor OS=Pseudomonas fluorescens (strain SBW25) GN=tig PE=3 SV=1 - [TIG_PSEFS]				436	48.316	38.07
IPI00300725.7;P02538	Keratin, type II cytoskeletal 6A				564	60.0083	37.94
IPI00299145.9;P48668	Keratin, type II cytoskeletal 6C				564	59.9883	36.17
IPI00016801.1;P00367	Glutamate dehydrogenase 1, mitochondrial	0.710944	19	4.91069	558	61.3592	35.84
P02701	Avidin OS=Gallus gallus GN=AVD PE=1 SV=3 - [AVID_CHICK]				152	16.7577	34.21
IPI00384444.6;P02533	Keratin, type I cytoskeletal 14				472	51.5294	34.11
IPI00009867.3;P13647	Keratin, type II cytoskeletal 5				590	62.34	33.9
IPI00216951.2;P14868	Aspartyl-tRNA synthetase, cytoplasmic	0.792384	13	9.08651	501	57.1	33.13
Q9YHC3	Tubulin beta-1 chain OS=Gadus morhua PE=2 SV=1 - [TBB1_GADMO]				445	49.7169	31.91
IPI00910738.1	cDNA FLJ60647, highly similar to Keratin, type II cytoskeletal 6B				526	55.6981	30.61
C3K1E8	ATP synthase subunit alpha OS=Pseudomonas fluorescens (strain SBW25) GN=atpA PE=3 SV=1 - [ATPA_PSEFS]				514	55.2446	30.54
IPI00002520.1;P34897	Serine hydroxymethyltransferase, mitochondrial	0.875156	13	5.37403	504	55.9577	29.96
O30549	Adenylosuccinate synthetase (Fragment) OS=Pseudomonas stutzeri GN=purA PE=3 SV=1 - [PURA_PSEST]				174	18.9982	29.31
IPI00031420.3;O60701	UDP-glucose 6-dehydrogenase	0.854163	8	15.8847	494	54.9893	28.14
P00761	Trypsin OS=Sus scrofa PE=1 SV=1 - [TRYP_PIG]	0.0236599	1		231	24.3938	26.84
IPI00217963.3;P08779	Keratin, type I cytoskeletal 16	0.0623415	1		473	51.2362	24.74
IPI00006663.1;P05091	Aldehyde dehydrogenase, mitochondrial	2.59843	7	1.54535	517	56.3456	22.24
P09653	Tubulin beta-5 chain OS=Gallus gallus PE=3 SV=1 - [TBB5_CHICK]	0.830266	1		446	49.9391	22.2
IPI00985361.1	Uncharacterized protein	0.901604	4	5.9289	303	32.4474	22.11
A5WBA3	ATP synthase subunit beta OS=Pseudomonas putida (strain F1 / ATCC 700007) GN=atpD PE=3 SV=1 - [ATPB_PSEP1]				458	49.3283	22.05
Q48BG5	ATP synthase subunit beta OS=Pseudomonas syringae pv. phaseolicola (strain 1448A / Race 6) GN=atpD PE=3 SV=1 - [ATPB_PSE14]				459	49.4914	22
IPI00893541.1	14 kDa protein	0.241911	2	411.263	123	13.5108	21.14
IPI01011853.1	cDNA FLJ35358 fis, clone PUAEN2000497, highly similar to Tubulin beta-6 chain	0.758064	7	1.92046	374	41.9251	20.59
Q27710	Catalase OS=Onchocerca volvulus endobacterium GN=cat PE=2 SV=1 - [CATA_ONCVE]				482	53.6665	20.54
Q3KIY4	Adenylosuccinate synthetase OS=Pseudomonas fluorescens (strain Pf0-1) GN=purA PE=1 SV=1 - [PURA_PSEPF]				429	46.5161	18.65
Q5XQN5	Keratin, type II cytoskeletal 5 OS=Bos taurus GN=KRT5 PE=1 SV=1 - [K2C5_BOVIN]				601	62.8983	17.3
IPI00103467.5;P30837	Aldehyde dehydrogenase X, mitochondrial	7.81657	6	10.9508	517	57.1702	16.63
IPI00419237.3;P28838	Isoform 1 of Cytosol aminopeptidase	0.801615	5	1.29894	519	56.1308	15.99
IPI00021187.4;Q9Y265	Isoform 1 of RuvB-like 1	0.801922	5	9.45408	456	50.1963	15.35
IPI00947285.1	suprabasin isoform 1 precursor				590	60.5046	15.25
IPI00177728.3;Q96KP4	Isoform 1 of Cytosolic non-specific dipeptidase	0.738105	5	5.56792	475	52.8449	13.89
IPI00025252.1;P30101	Protein disulfide-isomerase A3	0.760766	5	5.46876	505	56.7468	13.66
C3K3G6	Adenosylhomocysteinase OS=Pseudomonas fluorescens (strain SBW25) GN=ahcY PE=3 SV=1 - [SAHH_PSEFS]				469	51.212	13.22
B1J2Y8	Adenosylhomocysteinase OS=Pseudomonas putida (strain W619) GN=ahcY PE=3 SV=1 - [SAHH_PSEPW]				469	51.3582	10.23
P31052	Dihydrolipoamide dehydrogenase OS=Pseudomonas putida GN=lpdG PE=1 SV=4 - [DLDH2_PSEPU]				478	49.8651	9.83
P00762	Anionic trypsin-1 OS=Rattus norvegicus GN=Prss1 PE=1 SV=1 - [TRY1_RAT]				246	25.9427	9.76
IPI00297779.7;P78371	T-complex protein 1 subunit beta	1.31439	3	3.17549	535	57.4521	9.72
Q887Z4	Probable malate:quinone oxidoreductase OS=Pseudomonas syringae pv. tomato GN=mqo PE=3 SV=1 - [MQO_PSESM]				502	54.721	9.16
A7NEC7	Elongation factor Tu OS=Francisella tularensis subsp. holarctica (strain FTNF002-00 / FTA) GN=tuf PE=3 SV=1 - [EFTU_FRATF]				394	43.3631	9.14
Q6IMF3	Keratin, type II cytoskeletal 1 OS=Rattus norvegicus GN=Krt1 PE=2 SV=1 - [K2C1_RAT]				625	64.7911	8.64
O93532	Keratin, type II cytoskeletal cochleal OS=Gallus gallus PE=2 SV=1 - [K2CO_CHICK]				492	53.7705	8.54
Q51567	Succinyl-CoA ligase [ADP-forming] subunit alpha OS=Pseudomonas aeruginosa GN=sucD PE=3 SV=2 - [SUCD_PSEAE]				295	30.2467	8.14
IPI00221234.7;P49419	Isoform 1 of Alpha-aminoadipic semialdehyde dehydrogenase	0.790755	2	16.8023	539	58.4501	7.61
IPI00017617.1;P17844	Probable ATP-dependent RNA helicase DDX5	0.683264	4	9.95579	614	69.1047	7.33
Q3K6J0	Serine hydroxymethyltransferase 2 OS=Pseudomonas fluorescens (strain Pf0-1) GN=glyA2 PE=3 SV=1 - [GLYA2_PSEPF]				417	44.7669	6.95
IPI00016862.1;P00390	Isoform Mitochondrial of Glutathione reductase, mitochondrial	0.733907	3	5.06535	522	56.221	6.9
Q4K9S1	Cysteinyl-tRNA synthetase OS=Pseudomonas fluorescens (strain Pf-5 / ATCC BAA-477) GN=cysS PE=3 SV=1 - [SYC_PSEF5]				460	51.5286	6.74
C3K1K0	GMP synthase [glutamine-hydrolyzing] OS=Pseudomonas fluorescens (strain SBW25) GN=guaA PE=3 SV=1 - [GUAA_PSEFS]				525	58.3979	6.67
P47203	Cell division protein ftsA OS=Pseudomonas aeruginosa GN=ftsA PE=3 SV=2 - [FTSA_PSEAE]	0.0289397	1		417	44.6181	6.47
IPI00398625.5;Q86YZ3	Hornerin				2850	282.228	6.39
IPI00747810.3	52 kDa protein	0.727091	2	6.54641	472	52.2299	6.14
A0KU82	Enolase OS=Shewanella sp. (strain ANA-3) GN=eno PE=3 SV=1 - [ENO_SHESA]				431	45.6603	5.8
Q3TTY5	Keratin, type II cytoskeletal 2 epidermal OS=Mus musculus GN=Krt2 PE=1 SV=1 - [K22E_MOUSE]				707	70.8798	5.8
IPI00329306.3;Q7RTS7	Keratin, type II cytoskeletal 74				529	57.8296	5.67
C3K6G5	Probable cytosol aminopeptidase OS=Pseudomonas fluorescens (strain SBW25) GN=pepA PE=3 SV=1 - [AMPA_PSEFS]				496	52.4028	5.04
P30566	Adenylosuccinate lyase OS=Homo sapiens GN=ADSL PE=1 SV=2 - [PUR8_HUMAN]	1.3914	1		484	54.854	4.13
O57611	Keratin, type I cytoskeletal 18 OS=Scyliorhinus stellaris GN=krt18 PE=1 SV=1 - [K1C18_SCYST]				415	46.7629	3.86
P20930	Filaggrin OS=Homo sapiens GN=FLG PE=1 SV=3 - [FILA_HUMAN]				4061	434.922	3.35

## Sheet: SILAC ACVL2b -> ALDH1A1
		ACVL2b / Control			General information
Accession	Description	A5: Heavy/Light	A5: Heavy/Light Count	A5: Heavy/Light Variability [%]	# AAs	MW [kDa]	ΣCoverage
IPI00019359.4;P35527	Keratin, type I cytoskeletal 9	0.0199232	1		623	62.0268	57.46
IPI00031420.3;O60701	UDP-glucose 6-dehydrogenase	1.01787	20	5.51599	494	54.9893	46.76
IPI00220327.4;P04264	Keratin, type II cytoskeletal 1	0.0443561	1		644	65.999	45.19
IPI00009865.4;P13645	Keratin, type I cytoskeletal 10	0.0414324	1		584	58.7917	43.32
C3K2X8	Elongation factor Tu OS=Pseudomonas fluorescens (strain SBW25) GN=tuf PE=3 SV=1 - [EFTU_PSEFS]				397	43.5363	41.06
IPI00007247.4;P05166	Propionyl-CoA carboxylase beta chain, mitochondrial	1.29662	20	6.38001	539	58.1788	40.26
IPI00218343.4;Q9BQE3	Tubulin alpha-1C chain	1.04929	8	5.09804	449	49.8635	35.41
IPI00930688.1;P81947	Tubulin alpha-1B chain	1.04929	8	3.95844	451	50.1196	35.25
IPI00010796.1;P07237	Protein disulfide-isomerase	0.998018	21	4.44575	508	57.0807	34.65
Q4KFY6	Succinyl-CoA ligase [ADP-forming] subunit beta OS=Pseudomonas fluorescens (strain Pf-5 / ATCC BAA-477) GN=sucC PE=3 SV=1 - [SUCC_PSEF5]				388	41.3136	34.28
IPI00025252.1;P30101	Protein disulfide-isomerase A3	1.00285	20	5.08494	505	56.7468	34.26
P05384	DNA-binding protein HU-beta OS=Pseudomonas aeruginosa GN=hupB PE=1 SV=3 - [DBHB_PSEAE]				90	9.08105	32.22
IPI00021304.1	Keratin, type II cytoskeletal 2 epidermal	0.0160623	1		645	65.8254	30.7
C3K1K0	GMP synthase [glutamine-hydrolyzing] OS=Pseudomonas fluorescens (strain SBW25) GN=guaA PE=3 SV=1 - [GUAA_PSEFS]				525	58.3979	30.48
IPI00893541.1	14 kDa protein	0.994516	4	3.24343	123	13.5108	29.27
C3K1E8	ATP synthase subunit alpha OS=Pseudomonas fluorescens (strain SBW25) GN=atpA PE=3 SV=1 - [ATPA_PSEFS]	0.0197159	1		514	55.2446	27.04
P00761	Trypsin OS=Sus scrofa PE=1 SV=1 - [TRYP_PIG]				231	24.3938	26.84
A5WBA3	ATP synthase subunit beta OS=Pseudomonas putida (strain F1 / ATCC 700007) GN=atpD PE=3 SV=1 - [ATPB_PSEP1]				458	49.3283	26.42
IPI00300725.7;P02538	Keratin, type II cytoskeletal 6A				564	60.0083	24.82
Q48BG5	ATP synthase subunit beta OS=Pseudomonas syringae pv. phaseolicola (strain 1448A / Race 6) GN=atpD PE=3 SV=1 - [ATPB_PSE14]				459	49.4914	23.53
IPI00218914.5;P00352	Retinal dehydrogenase 1	7.63425	7	7.94929	501	54.827	21.56
IPI00302927.6;P50991	T-complex protein 1 subunit delta	1.36981	8	4.35645	539	57.8878	19.11
IPI00007752.1;Q3MHM5	Tubulin beta-2C chain	1.00155	6	0.662585	445	49.799	18.65
IPI00009867.3;P13647	Keratin, type II cytoskeletal 5	0.013335	1		590	62.34	18.14
B1JET1	Phosphoenolpyruvate carboxykinase [ATP] OS=Pseudomonas putida (strain W619) GN=pckA PE=3 SV=1 - [PCKA_PSEPW]				513	55.4057	17.74
Q25379	Actin, cytoskeletal 3 (Fragment) OS=Lytechinus pictus PE=3 SV=1 - [ACT3_LYTPI]	0.777913	1		172	19.3666	16.86
IPI00011200.5;O43175	D-3-phosphoglycerate dehydrogenase	0.978498	7	0.779613	533	56.6144	16.7
Q88C57	Phosphate import ATP-binding protein PstB 2 OS=Pseudomonas putida (strain KT2440) GN=pstB2 PE=3 SV=2 - [PSTB2_PSEPK]				277	31.107	15.16
IPI00027497.5;P06744	Glucose-6-phosphate isomerase	0.974589	5	14.945	558	63.1072	14.52
IPI00018465.1;Q99832	T-complex protein 1 subunit eta	1.11966	6	5.10557	543	59.3289	14
Q3K4F5	Phosphate import ATP-binding protein PstB OS=Pseudomonas fluorescens (strain Pf0-1) GN=pstB PE=3 SV=1 - [PSTB_PSEPF]				277	31.1421	13.72
IPI00784090.2;P50990	T-complex protein 1 subunit theta	0.679403	6	7.0925	548	59.5825	13.69
IPI00011126.6;P62191	26S protease regulatory subunit 4	1.09402	3	6.27562	440	49.1537	12.73
Q3KJP4	Phosphoenolpyruvate carboxykinase [ATP] OS=Pseudomonas fluorescens (strain Pf0-1) GN=pckA PE=1 SV=1 - [PCKA_PSEPF]				513	55.4039	12.67
P02701	Avidin OS=Gallus gallus GN=AVD PE=1 SV=3 - [AVID_CHICK]				152	16.7577	12.5
C3K6E0	Bifunctional purine biosynthesis protein purH OS=Pseudomonas fluorescens (strain SBW25) GN=purH PE=3 SV=1 - [PUR9_PSEFS]				535	57.3703	12.34
Q51342	Amidophosphoribosyltransferase OS=Pseudomonas aeruginosa GN=purF PE=3 SV=3 - [PUR1_PSEAE]				501	55.3353	11.38
IPI00384444.6;P02533	Keratin, type I cytoskeletal 14				472	51.5294	11.23
C3K5J5	Putative reductase PFLU_1621 OS=Pseudomonas fluorescens (strain SBW25) GN=PFLU_1621 PE=3 SV=1 - [Y1621_PSEFS]				397	42.9333	11.08
IPI00217963.3;P08779	Keratin, type I cytoskeletal 16				473	51.2362	10.99
Q51567	Succinyl-CoA ligase [ADP-forming] subunit alpha OS=Pseudomonas aeruginosa GN=sucD PE=3 SV=2 - [SUCD_PSEAE]				295	30.2467	10.85
Q27710	Catalase OS=Onchocerca volvulus endobacterium GN=cat PE=2 SV=1 - [CATA_ONCVE]				482	53.6665	10.79
P31052	Dihydrolipoamide dehydrogenase OS=Pseudomonas putida GN=lpdG PE=1 SV=4 - [DLDH2_PSEPU]				478	49.8651	9.83
P00762	Anionic trypsin-1 OS=Rattus norvegicus GN=Prss1 PE=1 SV=1 - [TRY1_RAT]				246	25.9427	9.76
C3KDR8	Glucans biosynthesis protein D OS=Pseudomonas fluorescens (strain SBW25) GN=opgD PE=3 SV=1 - [OPGD_PSEFS]				541	60.4851	9.61
IPI00186290.6;P13639	Elongation factor 2	1.05877	7	8.44	858	95.277	8.74
C3K3F1	Phosphoglycerate kinase OS=Pseudomonas fluorescens (strain SBW25) GN=pgk PE=3 SV=1 - [PGK_PSEFS]				387	40.1251	8.27
Q3KH92	Enolase OS=Pseudomonas fluorescens (strain Pf0-1) GN=eno PE=1 SV=1 - [ENO_PSEPF]				429	45.5133	8.16
B1J2Y8	Adenosylhomocysteinase OS=Pseudomonas putida (strain W619) GN=ahcY PE=3 SV=1 - [SAHH_PSEPW]				469	51.3582	7.25
P11413	Glucose-6-phosphate 1-dehydrogenase OS=Homo sapiens GN=G6PD PE=1 SV=4 - [G6PD_HUMAN]	1.13082	2	5.92928	515	59.219	7.18
C3KCT1	UDP-N-acetylmuramate--L-alanine ligase OS=Pseudomonas fluorescens (strain SBW25) GN=murC PE=3 SV=1 - [MURC_PSEFS]				481	52.1319	7.07
Q3K612	DNA-directed RNA polymerase subunit alpha OS=Pseudomonas fluorescens (strain Pf0-1) GN=rpoA PE=3 SV=1 - [RPOA_PSEPF]				333	36.6093	6.61
IPI00550689.3;Q9Y3I0	tRNA-splicing ligase RtcB homolog	1.11222	3	18.2538	505	55.1749	6.53
P52155	Transcription termination factor Rho OS=Pseudomonas fluorescens biotype C GN=rho PE=3 SV=1 - [RHO_PSEFC]				419	46.9249	5.97
Q08E38	Pre-mRNA-processing factor 19 OS=Bos taurus GN=PRPF19 PE=2 SV=1 - [PRP19_BOVIN]	0.913954	2	5.18026	504	55.1604	5.95
IPI00299402.1;P11498	Pyruvate carboxylase, mitochondrial	0.927012	4	3.36404	1178	129.551	5.86
C3K6G5	Probable cytosol aminopeptidase OS=Pseudomonas fluorescens (strain SBW25) GN=pepA PE=3 SV=1 - [AMPA_PSEFS]				496	52.4028	5.85
A0KU82	Enolase OS=Shewanella sp. (strain ANA-3) GN=eno PE=3 SV=1 - [ENO_SHESA]				431	45.6603	5.8
C3JYR1	Glycine dehydrogenase [decarboxylating] OS=Pseudomonas fluorescens (strain SBW25) GN=gcvP PE=3 SV=1 - [GCSP_PSEFS]				946	102.176	5.39
C3K3G6	Adenosylhomocysteinase OS=Pseudomonas fluorescens (strain SBW25) GN=ahcY PE=3 SV=1 - [SAHH_PSEFS]				469	51.212	5.33
Q9I3D2	Dihydrolipoyllysine-residue succinyltransferase component of 2-oxoglutarate dehydrogenase complex OS=Pseudomonas aeruginosa GN=sucB PE=3 SV=1 - [ODO2_PSEAE]				409	42.8605	5.13
Q5NVA2	Thioredoxin reductase 1, cytoplasmic OS=Pongo abelii GN=TXNRD1 PE=2 SV=3 - [TRXR1_PONAB]	1.01292	1		499	54.7168	5.01
IPI00744115.1;P05165	Isoform 1 of Propionyl-CoA carboxylase alpha chain, mitochondrial	0.55724	3	14.2668	728	80.0081	4.81
P26638	Seryl-tRNA synthetase, cytoplasmic OS=Mus musculus GN=Sars PE=2 SV=3 - [SYSC_MOUSE]	1.07868	1		512	58.3517	4.49
IPI00019450.2;P10155	Isoform Long of 60 kDa SS-A/Ro ribonucleoprotein	0.983976	1		538	60.6312	4.46
O57611	Keratin, type I cytoskeletal 18 OS=Scyliorhinus stellaris GN=krt18 PE=1 SV=1 - [K1C18_SCYST]				415	46.7629	3.86
IPI00966751.1	CaM kinase II isoform	0.890773	1		610	67.8374	3.44
Q62095	ATP-dependent RNA helicase DDX3Y OS=Mus musculus GN=Ddx3y PE=1 SV=2 - [DDX3Y_MOUSE]	0.922357	1		658	73.3822	3.34

## Sheet: SILAC ACV1 -> ALDH4A1
		ACV1 / Control			General information
Accession	Description	Heavy/Light	Heavy/Light Count	Heavy/Light Variability [%]	# AAs	MW [kDa]	ΣCoverage
IPI00479186.7;P14618	Isoform M2 of Pyruvate kinase isozymes M1/M2	0.733685	25	3.77487	531	57.9	52.73
IPI00019359.4;P35527	Keratin, type I cytoskeletal 9				623	62.0268	49.92
IPI00220327.4;P04264	Keratin, type II cytoskeletal 1				644	65.999	41.3
C3K2X8	Elongation factor Tu OS=Pseudomonas fluorescens (strain SBW25) GN=tuf PE=3 SV=1 - [EFTU_PSEFS]				397	43.5363	41.06
IPI00784154.1;P10809	60 kDa heat shock protein, mitochondrial	0.714097	22	2.68727	573	61.0164	40.84
Q4KFY6	Succinyl-CoA ligase [ADP-forming] subunit beta OS=Pseudomonas fluorescens (strain Pf-5 / ATCC BAA-477) GN=sucC PE=3 SV=1 - [SUCC_PSEF5]				388	41.3136	34.28
C3K1A0	60 kDa chaperonin OS=Pseudomonas fluorescens (strain SBW25) GN=groL PE=3 SV=1 - [CH60_PSEFS]				548	56.9307	33.58
P02701	Avidin OS=Gallus gallus GN=AVD PE=1 SV=3 - [AVID_CHICK]				152	16.7577	32.89
IPI00009865.4;P13645	Keratin, type I cytoskeletal 10				584	58.7917	32.19
C3K1E6	ATP synthase subunit beta OS=Pseudomonas fluorescens (strain SBW25) GN=atpD PE=3 SV=1 - [ATPB_PSEFS]				458	49.4594	29.04
Q3K441	ATP synthase subunit beta OS=Pseudomonas fluorescens (strain Pf0-1) GN=atpD PE=3 SV=1 - [ATPB_PSEPF]				458	49.4144	28.82
IPI00217871.4;P30038	Delta-1-pyrroline-5-carboxylate dehydrogenase, mitochondrial	2.91865	12	6.76058	563	61.6806	28.24
C3K1E8	ATP synthase subunit alpha OS=Pseudomonas fluorescens (strain SBW25) GN=atpA PE=3 SV=1 - [ATPA_PSEFS]				514	55.2446	27.04
P00761	Trypsin OS=Sus scrofa PE=1 SV=1 - [TRYP_PIG]				231	24.3938	26.84
P35908	Keratin, type II cytoskeletal 2 epidermal OS=Homo sapiens GN=KRT2 PE=1 SV=2 - [K22E_HUMAN]				639	65.3932	25.51
IPI00553185.2;P49368	T-complex protein 1 subunit gamma	0.734841	10	11.8299	545	60.4953	25.5
Q48BG5	ATP synthase subunit beta OS=Pseudomonas syringae pv. phaseolicola (strain 1448A / Race 6) GN=atpD PE=3 SV=1 - [ATPB_PSE14]				459	49.4914	25.05
Q3K7L6	60 kDa chaperonin OS=Pseudomonas fluorescens (strain Pf0-1) GN=groL PE=3 SV=1 - [CH60_PSEPF]				548	56.8027	21.9
IPI00020599.1;P27797	Calreticulin	0.63815	6	6.18373	417	48.1118	20.86
IPI00289499.3;P31939	Bifunctional purine biosynthesis protein PURH	0.74482	8	3.96664	592	64.5753	19.59
IPI00554737.3;P30153	Serine/threonine-protein phosphatase 2A 65 kDa regulatory subunit A alpha isoform	0.705125	7	12.7716	589	65.2669	18.68
C3K6H4	CTP synthase OS=Pseudomonas fluorescens (strain SBW25) GN=pyrG PE=3 SV=1 - [PYRG_PSEFS]				543	59.6596	17.68
Q3KH92	Enolase OS=Pseudomonas fluorescens (strain Pf0-1) GN=eno PE=1 SV=1 - [ENO_PSEPF]				429	45.5133	17.48
IPI00010720.1;P48643	T-complex protein 1 subunit epsilon	0.855833	6	7.73888	541	59.6328	17.38
IPI00027834.3;P14866	Heterogeneous nuclear ribonucleoprotein L	0.724699	6	3.41283	589	64.0924	16.98
Q48D33	Elongation factor G OS=Pseudomonas syringae pv. phaseolicola (strain 1448A / Race 6) GN=fusA PE=3 SV=1 - [EFG_PSE14]				701	77.18	16.83
Q4KHL4	Lysyl-tRNA synthetase OS=Pseudomonas fluorescens (strain Pf-5 / ATCC BAA-477) GN=lysS PE=3 SV=1 - [SYK_PSEF5]				500	57.0809	16.8
P22248	Glutamine synthetase OS=Azotobacter vinelandii GN=glnA PE=3 SV=1 - [GLNA_AZOVI]				467	51.7136	16.06
IPI00011603.2;O43242	26S proteasome non-ATPase regulatory subunit 3	0.648659	6	5.70696	534	60.9395	14.42
C3K4J5	Phosphoenolpyruvate carboxykinase [ATP] OS=Pseudomonas fluorescens (strain SBW25) GN=pckA PE=3 SV=1 - [PCKA_PSEFS]				513	55.3239	13.65
P86700	Actin, muscle (Fragments) OS=Chionoecetes opilio PE=1 SV=1 - [ACT_CHIOP]	0.614649	1		192	20.7898	13.54
C3K2X9	Elongation factor G OS=Pseudomonas fluorescens (strain SBW25) GN=fusA PE=3 SV=1 - [EFG_PSEFS]				701	77.1141	13.27
Q9HU65	Glutamine synthetase OS=Pseudomonas aeruginosa GN=glnA PE=1 SV=1 - [GLNA_PSEAE]				469	51.9118	13.22
C3K5J5	Putative reductase PFLU_1621 OS=Pseudomonas fluorescens (strain SBW25) GN=PFLU_1621 PE=3 SV=1 - [Y1621_PSEFS]				397	42.9333	13.1
IPI00551024.5;Q3LXA3	Bifunctional ATP-dependent dihydroxyacetone kinase/FAD-AMP lyase (cyclizing)	0.686101	5	11.9509	575	58.91	12.35
P31052	Dihydrolipoamide dehydrogenase OS=Pseudomonas putida GN=lpdG PE=1 SV=4 - [DLDH2_PSEPU]				478	49.8651	12.34
Q3K612	DNA-directed RNA polymerase subunit alpha OS=Pseudomonas fluorescens (strain Pf0-1) GN=rpoA PE=3 SV=1 - [RPOA_PSEPF]				333	36.6093	10.51
IPI00293665.9;P04259	Keratin, type II cytoskeletal 6B				564	60.0303	9.75
IPI00384444.6;P02533	Keratin, type I cytoskeletal 14				472	51.5294	9.75
IPI00018140.3;O60506	Isoform 1 of Heterogeneous nuclear ribonucleoprotein Q	0.717015	4	0.639049	623	69.5596	9.15
IPI00219526.6;P36871	Isoform 1 of Phosphoglucomutase-1	0.668125	5	3.02506	562	61.4105	9.07
IPI00007074.5;P54577	Tyrosyl-tRNA synthetase, cytoplasmic	0.679518	4	18.0936	528	59.1061	7.95
C3K3G6	Adenosylhomocysteinase OS=Pseudomonas fluorescens (strain SBW25) GN=ahcY PE=3 SV=1 - [SAHH_PSEFS]				469	51.212	7.89
IPI00744115.1;P05165	Isoform 1 of Propionyl-CoA carboxylase alpha chain, mitochondrial	0.570269	5	13.6251	728	80.0081	7.69
IPI00184821.1;Q13057	Isoform 1 of Bifunctional coenzyme A synthase	0.619643	3	9.91471	564	62.29	7.62
Q51567	Succinyl-CoA ligase [ADP-forming] subunit alpha OS=Pseudomonas aeruginosa GN=sucD PE=3 SV=2 - [SUCD_PSEAE]				295	30.2467	7.46
Q7NQX1	60 kDa chaperonin 2 OS=Chromobacterium violaceum GN=groL2 PE=3 SV=1 - [CH602_CHRVO]				546	57.3821	7.14
IPI00784090.2;P50990	T-complex protein 1 subunit theta	0.976477	3	6.26344	548	59.5825	7.12
P47203	Cell division protein ftsA OS=Pseudomonas aeruginosa GN=ftsA PE=3 SV=2 - [FTSA_PSEAE]				417	44.6181	6.95
C3KAH3	Arginyl-tRNA synthetase OS=Pseudomonas fluorescens (strain SBW25) GN=argS PE=3 SV=1 - [SYR_PSEFS]				578	63.5485	6.57
P47204	Cell division protein ftsZ OS=Pseudomonas aeruginosa GN=ftsZ PE=1 SV=2 - [FTSZ_PSEAE]				394	41.1922	6.35
Q4KJR8	2,3-bisphosphoglycerate-independent phosphoglycerate mutase OS=Pseudomonas fluorescens (strain Pf-5 / ATCC BAA-477) GN=gpmI PE=1 SV=1 - [GPMI_PSEF5]				513	55.557	6.24
P52155	Transcription termination factor Rho OS=Pseudomonas fluorescens biotype C GN=rho PE=3 SV=1 - [RHO_PSEFC]				419	46.9249	5.97
O87796	Fructose-bisphosphate aldolase OS=Pseudomonas stutzeri GN=fba PE=3 SV=1 - [ALF_PSEST]				354	38.3261	5.93
IPI01015917.1	T-complex protein 1 subunit delta	0.272251	2	413.593	389	42.2726	5.91
C3K6G5	Probable cytosol aminopeptidase OS=Pseudomonas fluorescens (strain SBW25) GN=pepA PE=3 SV=1 - [AMPA_PSEFS]				496	52.4028	5.85
P02552	Tubulin alpha-1 chain (Fragment) OS=Gallus gallus PE=1 SV=1 - [TBA1_CHICK]				412	45.8716	5.83
C3KDR8	Glucans biosynthesis protein D OS=Pseudomonas fluorescens (strain SBW25) GN=opgD PE=3 SV=1 - [OPGD_PSEFS]				541	60.4851	5.73
A8FSS8	Enolase OS=Shewanella sediminis (strain HAW-EB3) GN=eno PE=3 SV=1 - [ENO_SHESH]				431	46.0073	5.57
C3K1G2	Inner membrane protein oxaA OS=Pseudomonas fluorescens (strain SBW25) GN=oxaA PE=3 SV=1 - [OXAA_PSEFS]				560	61.9771	5.54
B0KQD8	Peptide chain release factor 3 OS=Pseudomonas putida (strain GB-1) GN=prfC PE=3 SV=1 - [RF3_PSEPG]				527	59.6474	5.31
Q59714	Catalase OS=Pseudomonas putida GN=katA PE=3 SV=1 - [CATA_PSEPU]				479	53.3484	5.22
IPI00414676.6;P08238	Heat shock protein HSP 90-beta	1.63313	2	152.2	724	83.2121	4.7
IPI00165261.6;Q8WVM8	Sec1 family domain-containing protein 1	0.758553	2	9.71193	642	72.3341	4.67
C3KCT1	UDP-N-acetylmuramate--L-alanine ligase OS=Pseudomonas fluorescens (strain SBW25) GN=murC PE=3 SV=1 - [MURC_PSEFS]				481	52.1319	4.37
Q88NF9	Probable malate:quinone oxidoreductase 2 OS=Pseudomonas putida (strain KT2440) GN=mqo2 PE=3 SV=1 - [MQO2_PSEPK]				527	58.0805	4.36
P07237	Protein disulfide-isomerase OS=Homo sapiens GN=P4HB PE=1 SV=3 - [PDIA1_HUMAN]	0.655198	2	4.92036	508	57.0807	4.33
A5W976	Glucose-6-phosphate isomerase OS=Pseudomonas putida (strain F1 / ATCC 700007) GN=pgi PE=3 SV=1 - [G6PI_PSEP1]				554	61.3893	4.15
IPI00012074.3;O43390	Isoform 1 of Heterogeneous nuclear ribonucleoprotein R	0.720402	2	0.457223	633	70.8993	3.95
IPI00299402.1;P11498	Pyruvate carboxylase, mitochondrial	0.653173	3	1.30677	1178	129.551	3.82
Q8C166	Copine-1 OS=Mus musculus GN=Cpne1 PE=1 SV=1 - [CPNE1_MOUSE]	0.64798	2	3.61199	536	58.8494	3.73
Q62095	ATP-dependent RNA helicase DDX3Y OS=Mus musculus GN=Ddx3y PE=1 SV=2 - [DDX3Y_MOUSE]	0.590564	1		658	73.3822	3.34
P13647	Keratin, type II cytoskeletal 5 OS=Homo sapiens GN=KRT5 PE=1 SV=3 - [K2C5_HUMAN]				590	62.34	3.05

## Sheet: SILAC ACV2-> ALDH1A1
		ACV2 / Control			General information
Accession	Description	A5: Heavy/Light	A5: Heavy/Light Count	A5: Heavy/Light Variability [%]	# AAs	MW [kDa]	ΣCoverage
IPI00218914.5;P00352	Retinal dehydrogenase 1	5.73575	18	7.89031	501	54.827	49.7
IPI00031420.3;O60701	UDP-glucose 6-dehydrogenase	1.04151	20	5.09321	494	54.9893	41.7
C3K2X8	Elongation factor Tu OS=Pseudomonas fluorescens (strain SBW25) GN=tuf PE=3 SV=1 - [EFTU_PSEFS]				397	43.5363	38.79
IPI00025252.1;P30101	Protein disulfide-isomerase A3	1.03609	19	4.38999	505	56.7468	37.43
IPI00009865.4;P13645	Keratin, type I cytoskeletal 10				584	58.7917	36.99
IPI00220327.4;P04264	Keratin, type II cytoskeletal 1				644	65.999	35.09
IPI00007247.4;P05166	Propionyl-CoA carboxylase beta chain, mitochondrial	1.18542	15	2.83085	539	58.1788	33.58
IPI00218343.4;Q9BQE3	Tubulin alpha-1C chain	1.42306	10	4.90321	449	49.8635	33.41
IPI00930688.1;P81947	Tubulin alpha-1B chain	1.42306	10	3.84356	451	50.1196	33.26
IPI00893541.1	14 kDa protein	0.97417	2	8.21641	123	13.5108	29.27
Q4KFY6	Succinyl-CoA ligase [ADP-forming] subunit beta OS=Pseudomonas fluorescens (strain Pf-5 / ATCC BAA-477) GN=sucC PE=3 SV=1 - [SUCC_PSEF5]				388	41.3136	28.09
P35908	Keratin, type II cytoskeletal 2 epidermal OS=Homo sapiens GN=KRT2 PE=1 SV=2 - [K22E_HUMAN]	0.0113594	1		639	65.3932	28.01
C3K1K0	GMP synthase [glutamine-hydrolyzing] OS=Pseudomonas fluorescens (strain SBW25) GN=guaA PE=3 SV=1 - [GUAA_PSEFS]				525	58.3979	27.05
P00761	Trypsin OS=Sus scrofa PE=1 SV=1 - [TRYP_PIG]				231	24.3938	26.84
IPI00021304.1	Keratin, type II cytoskeletal 2 epidermal				645	65.8254	26.36
IPI00027547.2;P81605	Dermcidin				110	11.2768	25.45
C3K1E8	ATP synthase subunit alpha OS=Pseudomonas fluorescens (strain SBW25) GN=atpA PE=3 SV=1 - [ATPA_PSEFS]				514	55.2446	23.74
IPI00011200.5;O43175	D-3-phosphoglycerate dehydrogenase	1.0555	9	6.37489	533	56.6144	23.64
IPI00300725.7;P02538	Keratin, type II cytoskeletal 6A				564	60.0083	22.7
Q48BG5	ATP synthase subunit beta OS=Pseudomonas syringae pv. phaseolicola (strain 1448A / Race 6) GN=atpD PE=3 SV=1 - [ATPB_PSE14]				459	49.4914	19.83
A5WBA3	ATP synthase subunit beta OS=Pseudomonas putida (strain F1 / ATCC 700007) GN=atpD PE=3 SV=1 - [ATPB_PSEP1]				458	49.3283	19.21
IPI00019359.4;P35527	Keratin, type I cytoskeletal 9				623	62.0268	18.62
IPI00910738.1	cDNA FLJ60647, highly similar to Keratin, type II cytoskeletal 6B				526	55.6981	18.06
C3KDR8	Glucans biosynthesis protein D OS=Pseudomonas fluorescens (strain SBW25) GN=opgD PE=3 SV=1 - [OPGD_PSEFS]				541	60.4851	16.45
IPI00550689.3;Q9Y3I0	tRNA-splicing ligase RtcB homolog	1.07069	8	11.3015	505	55.1749	14.85
P02701	Avidin OS=Gallus gallus GN=AVD PE=1 SV=3 - [AVID_CHICK]				152	16.7577	12.5
IPI00027497.5;P06744	Glucose-6-phosphate isomerase	0.941674	4	23.3984	558	63.1072	11.83
Q51342	Amidophosphoribosyltransferase OS=Pseudomonas aeruginosa GN=purF PE=3 SV=3 - [PUR1_PSEAE]				501	55.3353	11.38
Q48BP8	Phosphate import ATP-binding protein PstB 2 OS=Pseudomonas syringae pv. phaseolicola (strain 1448A / Race 6) GN=pstB2 PE=3 SV=1 - [PSTB2_PSE14]				277	31.1751	11.19
Q51567	Succinyl-CoA ligase [ADP-forming] subunit alpha OS=Pseudomonas aeruginosa GN=sucD PE=3 SV=2 - [SUCD_PSEAE]				295	30.2467	10.85
Q27710	Catalase OS=Onchocerca volvulus endobacterium GN=cat PE=2 SV=1 - [CATA_ONCVE]				482	53.6665	10.79
IPI00009867.3;P13647	Keratin, type II cytoskeletal 5				590	62.34	9.83
P31052	Dihydrolipoamide dehydrogenase OS=Pseudomonas putida GN=lpdG PE=1 SV=4 - [DLDH2_PSEPU]				478	49.8651	9.83
P00762	Anionic trypsin-1 OS=Rattus norvegicus GN=Prss1 PE=1 SV=1 - [TRY1_RAT]				246	25.9427	9.76
IPI00004968.1;Q9UMS4	Pre-mRNA-processing factor 19	1.01616	4	3.5555	504	55.1463	9.72
A5VXQ0	50S ribosomal protein L2 OS=Pseudomonas putida (strain F1 / ATCC 700007) GN=rplB PE=3 SV=1 - [RL2_PSEP1]				274	29.651	8.76
IPI00289800.7;P11413	Isoform Short of Glucose-6-phosphate 1-dehydrogenase	1.13595	4	3.23287	515	59.219	8.54
IPI00215888.4;O76094	Signal recognition particle 72 kDa protein	1.04187	5	10.129	671	74.56	8.05
IPI00302927.6;P50991	T-complex protein 1 subunit delta	0.881795	3	3.51296	539	57.8878	7.98
Q3KH92	Enolase OS=Pseudomonas fluorescens (strain Pf0-1) GN=eno PE=1 SV=1 - [ENO_PSEPF]				429	45.5133	7.69
IPI00018465.1;Q99832	T-complex protein 1 subunit eta	0.732503	3	1.60827	543	59.3289	7
P23381	Tryptophanyl-tRNA synthetase, cytoplasmic OS=Homo sapiens GN=WARS PE=1 SV=2 - [SYWC_HUMAN]	1.02835	1		471	53.1316	6.79
IPI00215687.1	Isoform 3 of Glutaminase kidney isoform, mitochondrial	0.970899	2	10.0756	598	65.4179	6.52
IPI00186290.6;P13639	Elongation factor 2	1.05051	4	0.676271	858	95.277	6.18
IPI00909399.2	xaa-Pro dipeptidase isoform 3	1.0215	2	0.245363	429	47.2304	6.06
P52155	Transcription termination factor Rho OS=Pseudomonas fluorescens biotype C GN=rho PE=3 SV=1 - [RHO_PSEFC]				419	46.9249	5.97
C3KCT1	UDP-N-acetylmuramate--L-alanine ligase OS=Pseudomonas fluorescens (strain SBW25) GN=murC PE=3 SV=1 - [MURC_PSEFS]				481	52.1319	5.61
A8FSS8	Enolase OS=Shewanella sediminis (strain HAW-EB3) GN=eno PE=3 SV=1 - [ENO_SHESH]				431	46.0073	5.57
C3K3G6	Adenosylhomocysteinase OS=Pseudomonas fluorescens (strain SBW25) GN=ahcY PE=3 SV=1 - [SAHH_PSEFS]				469	51.212	5.33
C3JYR1	Glycine dehydrogenase [decarboxylating] OS=Pseudomonas fluorescens (strain SBW25) GN=gcvP PE=3 SV=1 - [GCSP_PSEFS]				946	102.176	3.49
IPI00215637.5;O00571	ATP-dependent RNA helicase DDX3X	1.87169	2	1.94843	662	73.198	3.32
IPI00299402.1;P11498	Pyruvate carboxylase, mitochondrial	0.87539	2	7.18612	1178	129.551	2.46
IPI00397801.4;Q5D862	Filaggrin-2				2391	247.928	2.26
