# Supplementary material for: Target discovery of acivicin in cancer cells elucidates its mechanism of growth inhibition
Source: Chem Sci. 2014 Sep 16;6(1):237–45. doi: 10.1039/c4sc02339k (PMC4285139; doi:10.1039/c4sc02339k)
Supplement: Supplementary file 4 [file SC-006-C4SC02339K-s004.xlsx]

## Sheet: Competition ACV and ACV1
		1) ACV1 / (ACV + ACV1)			2) ACV1 / (ACV + ACV1)			3) (ACV + ACV1) / ACV1			General information
Accession	Description	A10: Heavy/Medium	A10: Heavy/Medium Count	A10: Heavy/Medium Variability [%]	B10: Heavy/Medium	B10: Heavy/Medium Count	B10: Heavy/Medium Variability [%]	C10: Heavy/Medium	C10: Heavy/Medium Count	C10: Heavy/Medium Variability [%]	# AAs	MW [kDa]	ΣCoverage
IPI00019359.4	Keratin, type I cytoskeletal 9										623	62.0268	56.66
IPI00784154.1	60 kDa heat shock protein, mitochondrial	0.970809	17	13.3682	1.22651	26	16.7254	0.544619	10	14.6756	573	61.0164	47.29
IPI00220327.4	Keratin, type II cytoskeletal 1										644	65.999	41.93
IPI00479186.7	Isoform M2 of Pyruvate kinase isozymes M1/M2	0.769833	10	19.9074	1.04781	8	19.7141	0.457792	7	13.9051	531	57.9	33.71
IPI00217871.4	Delta-1-pyrroline-5-carboxylate dehydrogenase, mitochondrial	2.22965	6	19.4912	3.16677	9	14.0986	0.191985	5	15.4155	563	61.6806	33.21
IPI00009865.4	Keratin, type I cytoskeletal 10										584	58.7917	32.19
IPI00021304.1	Keratin, type II cytoskeletal 2 epidermal										645	65.8254	31.16
IPI00977430.1	cDNA, FLJ79286, highly similar to T-complex protein 1 subunit gamma	0.775987	6	12.2574	1.25571	6	5.76887	0.607653	6	7.9997	500	55.6387	30.2
IPI00551024.5	Bifunctional ATP-dependent dihydroxyacetone kinase/FAD-AMP lyase (cyclizing)	0.720538	3	18.3158	1.84771	4	17.7419				575	58.91	17.74
IPI00927191.2	Isoform 3 of Beta-galactosidase	1.078	6	11.7773	1.18511	4	5.02684	0.596971	2	3.66504	647	72.7045	14.84
IPI00922603.1	cDNA FLJ52418, highly similar to Amine oxidase (flavin-containing) B	1.01453	3	6.76025	1.30126	2	4.28499	0.600896	3	15.0052	411	46.5087	14.11
IPI00895869.1	Isoform 2 of Propionyl-CoA carboxylase alpha chain, mitochondrial	1.09308	3	10.043	0.215202	3	1.81198	0.437029	2	2.16645	702	76.9986	13.11
IPI00384444.6	Keratin, type I cytoskeletal 14										472	51.5294	11.23
IPI01021125.1	Protein										196	21.9517	11.22
IPI01014211.1	T-complex protein 1 subunit alpha	0.668836	2	16.3481				0.95494	1		332	36.4332	11.14
IPI00940257.2	cDNA FLJ52362, highly similar to T-complex protein 1 subunit epsilon	0.662394	3	8.27735	1.18503	3	2.59028	0.455362	3	9.16348	448	49.4948	10.71
IPI00915274.1	H/ACA ribonucleoprotein complex subunit 4 isoform 2				2.40936	3	4.9847				509	56.9965	9.63
IPI00019988.1	N-sulphoglucosamine sulphohydrolase	0.909851	2	6.95924	0.552596	4	17.8873	0.540327	2	21.4827	502	56.6595	9.56
IPI00798401.2	cDNA FLJ50992, highly similar to Coronin-1C	0.729681	2	14.7637	0.68674	2	14.1512	0.59338	2	0.853875	437	49.3471	9.15
IPI00514530.5	Uncharacterized protein							0.925107	2	32.721	289	32.2539	9
IPI00983581.1	SYNCRIP protein (Fragment)	1.31434	3	20.2013							453	50.6189	8.83
IPI00985037.1	cDNA, FLJ79327, highly similar to Methylcrotonoyl-CoA carboxylase subunit alpha, mitochondrial				0.313379	2	43.8328				434	48.1854	8.53
IPI00029140.7	Uncharacterized protein	0.86795	2	26.6491	1.07575	2	49.0118	0.6193	1		545	61.959	8.26
IPI00945791.1	Uncharacterized protein	0.899525	1								283	31.8679	8.13
IPI00293665.9	Keratin, type II cytoskeletal 6B										564	60.0303	7.62
IPI01012403.1	cDNA, FLJ79105, highly similar to Phosphoenolpyruvate carboxykinase (GTP), mitochondrial	1.11416	2	20.9037				0.712742	3	5.85597	506	55.917	7.51
IPI00184821.1	Isoform 1 of Bifunctional coenzyme A synthase	0.9647	2	27.727				0.568765	2	7.06152	564	62.29	6.91
IPI01009326.1	cDNA FLJ53379, highly similar to T-complex protein 1 subunit theta	0.652447	3	8.36196				0.550401	3	8.60384	529	57.6084	6.81
IPI00031661.1	Nucleolar complex protein 4 homolog				0.241477	2	22.7952	0.348872	1		516	58.4307	6.78
IPI00925601.1	Uncharacterized protein	0.958826	2	18.4014				0.0736978	2	8021.03	591	64.4833	6.77
IPI00985384.1	ATP-dependent RNA helicase DDX3X isoform 3	0.889843	2	17.2738				0.459239	3	27.9347	646	71.3109	6.66
IPI00013808.1	Alpha-actinin-4	0.877143	5	7.11716				0.479042	2	3.59442	911	104.788	6.59
IPI00908375.2	cDNA FLJ52821, highly similar to Protein transport protein Sec23A							0.306443	1		399	44.0315	6.52
IPI00967282.1	cDNA FLJ54351, weakly similar to Long-chain-fatty-acid--CoA ligase	0.849842	2	2.25297	0.755328	3	10.9542	0.572754	2	11.4577	602	66.755	6.48
IPI00007074.5	Tyrosyl-tRNA synthetase, cytoplasmic	0.725092	3	8.89005							528	59.1061	6.25
IPI01010968.1	cDNA FLJ53979, highly similar to DnaJ homolog subfamily C member 11				0.833157	2	12.8678				469	52.6256	6.18
IPI00299402.1	Pyruvate carboxylase, mitochondrial	1.06926	2	7.02433	0.361241	3	11.4625	0.64735	3	9.40589	1178	129.551	6.11
IPI00168184.8	cDNA FLJ56053, highly similar to Serine/threonine-protein phosphatase 2A 65 kDa regulatory subunit A alpha isoform	0.560905	2	47.9744							509	56.8121	5.89
IPI00790834.2	Uncharacterized protein	0.947985	2	12.5621	1.36769	2	5.99605				488	53.8989	5.74
IPI00922694.2	Uncharacterized protein							0.496699	2	16.0489	632	69.8831	4.91
IPI01013273.1	cDNA, FLJ79129, highly similar to T-complex protein 1 subunit zeta							0.72201	2	11.3352	500	54.8328	4.4
IPI00465436.4	Catalase	0.616433	2	2.41681							527	59.7188	4.36
IPI00917016.2	copine-1 isoform c							0.48158	2	13.8406	536	58.8935	3.36
