# Supplementary material for: Target discovery of acivicin in cancer cells elucidates its mechanism of growth inhibition
Source: Chem Sci. 2014 Sep 16;6(1):237–45. doi: 10.1039/c4sc02339k (PMC4285139; doi:10.1039/c4sc02339k)
Supplement: Supplementary file 5 [file SC-006-C4SC02339K-s005.xlsx]

## Sheet: ACV2 -> ALDH1A1, ALDH2
		Area				Control day 1			Control day 5			ACV2 day 1			ACV2 day 5			General information
Accession	Description	Control day 1	Control day 5	ACV2 day 1	ACV2 day 5	Score A2	# Peptides A2	# PSM A2	Score B2	# Peptides B2	# PSM B2	Score C2	# Peptides C2	# PSM C2	Score D2	# Peptides D2	# PSM D2	# AAs	MW [kDa]	ΣCoverage
IPI01012004.1	cDNA PSEC0175 fis, clone OVARC1000169, highly similar to Protein disulfide-isomerase A3	8.59094e+08	5.83573e+08	1.25021e+09	952562377	225.536	29	75	153.317	20	53	110.146	20	38	145.756	23	52	480	54.0685	69.79
IPI00007247.4	Propionyl-CoA carboxylase beta chain, mitochondrial	7.00668e+08	1.9808e+08	6.74029e+08	7.68109e+08	195.157	24	60	107.128	17	34	266.931	20	93	165.959	17	55	539	58.1788	57.33
IPI00218914.5	Retinal dehydrogenase 1	1.63515e+08	2.353e+08	4.48969e+08	5.24968e+08	70.5401	18	23	77.7224	15	24	68.9169	16	23	91.9909	16	31	501	54.827	56.89
IPI00930688.1	Tubulin alpha-1B chain	1.02657e+09	9.682e+08	1.15803e+09	9.10295e+08	122.077	16	37	193.344	13	61	145.341	12	50	135.102	12	45	451	50.1196	51.22
IPI00218343.4	Tubulin alpha-1C chain	1.02657e+09	9.682e+08	1.15803e+09	9.10295e+08	102.799	14	32	187.532	14	59	142.828	13	49	136.501	13	45	449	49.8635	50.33
IPI00893541.1	14 kDa protein	8.94246e+08	6.26083e+08	1.1638e+09	8.26309e+08	55.2018	6	20	51.4285	6	17	131.221	6	44	60.9163	7	20	123	13.5108	48.78
IPI00007752.1	Tubulin beta-2C chain	4.17988e+07	1.57777e+08	1.30801e+08	1.47923e+08	27.7648	10	10	97.8938	16	33	55.6774	11	20	56.8684	12	20	445	49.799	46.97
IPI00021304.1	Keratin, type II cytoskeletal 2 epidermal	1.90037e+08	2.29077e+08	2.95818e+08	3.39333e+08	76.2209	19	25	69.6343	15	22	68.7178	17	22	63.1378	15	20	645	65.8254	46.2
IPI00220327.4	Keratin, type II cytoskeletal 1	2.1708e+08	2.93542e+08	3.73489e+08	4.21598e+08	103.021	22	33	84.2341	12	26	176.679	16	62	85.3063	11	26	644	65.999	46.12
IPI01020686.1	Uncharacterized protein	4.17988e+07	1.57777e+08	1.21726e+08	1.47615e+08	29.2911	10	10	89.4447	15	30	54.4717	11	19	50.7487	11	18	435	48.4876	44.14
IPI00009865.4	Keratin, type I cytoskeletal 10	3.64135e+08	3.45026e+08	6.64472e+08	3.37993e+08	94.1499	19	29	80.0183	17	26	176.503	17	53	50.8937	13	18	584	58.7917	42.64
IPI00013683.2	Tubulin beta-3 chain	4.17988e+07	1.57777e+08	1.21726e+08	1.42326e+08	21.8383	7	7	80.7373	13	26	34.7023	8	12	46.7004	10	17	450	50.4003	41.56
IPI01025367.1	56 kDa protein	8.14577e+07	7.41908e+07	1.16573e+08	9.83854e+07	39.6284	13	14	39.3272	12	14	48.6855	13	17	37.5756	8	12	522	56.1917	41
IPI00031420.3	UDP-glucose 6-dehydrogenase	1.69912e+08	5.67815e+07	6.823e+07	1.07212e+08	56.2078	15	19	21.2491	7	8	25.811	9	9	35.338	13	13	494	54.9893	40.08
IPI00011200.5	D-3-phosphoglycerate dehydrogenase	3.13233e+08	3.07426e+08	5.76266e+08	2.65555e+08	94.2296	16	30	86.1113	13	26	102.547	14	35	61.5352	12	21	533	56.6144	39.02
IPI00006663.1	Aldehyde dehydrogenase, mitochondrial	8.30299e+06	3.50845e+07	1.65387e+08	3.19949e+08	6.26925	2	2	22.3042	5	8	50.2567	14	17	59.5682	14	21	517	56.3456	38.49
IPI00019359.4	Keratin, type I cytoskeletal 9	6.19248e+07	1.30865e+08	1.18763e+08	2.17942e+08	37.4892	10	11	30.499	7	9	23.506	6	8	37.5155	8	11	623	62.0268	38.04
IPI01015038.1	T-complex protein 1 subunit delta	8.42946e+07	3.18232e+06	3.99963e+07	3.56322e+07	50.3017	13	16	7.46835	3	3	17.1147	6	6	19.4761	6	7	483	52.2979	37.06
IPI00152432.2	Isoform 1 of Alanine aminotransferase 2	2.68173e+07	1.0894e+08	9.72667e+07	7.68157e+07	14.2719	4	4	64.9579	11	18	40.723	10	13	35.3461	9	10	523	57.8664	36.33
IPI00963899.3	cDNA FLJ38173 fis, clone FCBBF1000053, highly similar to HYDROXYMETHYLGLUTARYL-COA SYNTHASE, CYTOPLASMIC	1.47589e+08	4.51885e+07	1.16495e+08	4.19984e+07	38.0689	11	12	18.5946	6	6	32.8713	10	12	19.2694	6	7	509	56.2029	35.17
IPI00784154.1	60 kDa heat shock protein, mitochondrial	9.8585e+07	9.46674e+07	6.55906e+07	3.01923e+07	44.7474	11	14	47.5083	10	15	30.2631	10	10	20.1336	7	7	573	61.0164	35.08
IPI00384280.5	Prenylcysteine oxidase 1	8.91563e+07	5.33452e+07	1.12584e+08	9.61535e+07	34.8676	9	11	29.2361	10	10	29.7005	8	10	22.8537	8	8	505	56.6037	35.05
IPI00604713.6	cDNA FLJ41699 fis, clone HCHON2004776, highly similar to Homo sapiens cytoskeleton-associated protein 4 (CKAP4), mRNA	3.94217e+07	1.24948e+07	5.85167e+07	3.07429e+07	31.044	10	10	14.4639	4	5	25.7452	9	9	26.3632	7	8	521	58.1158	34.93
IPI00010796.1	Protein disulfide-isomerase	3.62834e+07	2.74393e+07	1.47763e+07	1.3455e+08	23.9534	8	8	18.5815	6	6	12.5618	4	5	59.0688	14	19	508	57.0807	32.28
IPI00908881.3	Glucose-6-phosphate isomerase	1.96967e+08	4.4459e+07	2.06057e+08	1.28395e+08	64.2617	10	19	33.5932	7	11	40.8095	9	13	35.569	9	12	531	59.9526	32.02
IPI01022121.1	Uncharacterized protein	0	3.16443e+07	0	0				30.414	10	10							416	44.7846	30.53
IPI00939159.6	Adenylyl cyclase-associated protein	5.61798e+07	5.19172e+07	5.6378e+07	6.16825e+07	34.5044	7	10	27.0765	7	8	26.6238	7	8	27.0633	7	8	433	47.0913	29.79
IPI00103467.5	Aldehyde dehydrogenase X, mitochondrial	9.7568e+06	1.04298e+08	6.49321e+07	3.30385e+07	5.85395	2	2	47.2306	10	15	33.4739	9	11	17.8445	4	6	517	57.1702	29.4
IPI01014382.2	Uncharacterized protein	4.75172e+07	4.77183e+07	4.02937e+07	3.68672e+07	14.6068	5	5	29.342	10	10	19.1647	7	7	24.4914	8	9	490	54.2526	29.18
IPI00295400.1	Isoform 1 of Tryptophanyl-tRNA synthetase, cytoplasmic	2.53191e+07	4.95185e+07	4.64437e+07	3.44275e+07	19.2574	5	6	26.0394	7	8	32.6527	9	10	14.2462	5	5	471	53.1316	28.87
IPI00982734.1	Conserved hypothetical protein	8.23924e+06	0	1.71951e+07	0	4.78959	2	2				7.83529	3	3				113	12.8324	28.32
IPI00291510.3	Inosine-5'-monophosphate dehydrogenase 2	7.62762e+07	4.83663e+07	1.0446e+08	3.661e+07	48.2409	11	14	32.2314	9	9	41.996	9	13	22.5291	7	7	514	55.7696	27.43
IPI00884082.3	Glucose-6-phosphate 1-dehydrogenase	2.43364e+07	2.59434e+07	5.59083e+07	1.86104e+07	15.0167	5	5	33.9237	9	11	26.2598	8	9	13.5282	4	5	509	58.2264	26.72
IPI00001441.3	Isoform A of Formimidoyltransferase-cyclodeaminase	1.91322e+07	0	7.51723e+06	1.50452e+07	17.3082	6	6				5.1105	2	2	16.9379	6	6	541	58.8894	26.43
IPI01009563.1	Adenylyl cyclase-associated protein	5.64553e+07	5.29964e+07	7.19683e+07	6.78319e+07	39.9625	8	12	31.2813	8	10	31.4196	8	10	31.9379	8	10	452	49.2774	26.33
IPI00179964.5	Isoform 1 of Polypyrimidine tract-binding protein 1	2.84443e+07	4.15723e+07	3.80466e+07	4.32457e+07	23.8886	6	7	14.1923	5	5	15.4491	6	6	4.44485	2	2	531	57.1856	26.18
IPI00009867.3	Keratin, type II cytoskeletal 5	5.50031e+07	1.55655e+07	4.1198e+07	5.41544e+07	25.8485	7	9	14.7728	3	5	35.5738	10	12	16.5178	6	6	590	62.34	25.93
IPI00909399.2	xaa-Pro dipeptidase isoform 3	6.19077e+07	2.89593e+07	5.96677e+07	4.57667e+07	17.6913	5	6	16.0139	5	6	13.9378	4	5	26.9294	5	10	429	47.2304	25.17
IPI00514561.1	cDNA FLJ54552, highly similar to Heterogeneous nuclear ribonucleoprotein K	2.80922e+07	2.32547e+07	3.79448e+07	2.27622e+07	15.3643	5	5	15.3314	4	6	23.9179	6	8	11.0705	4	4	428	47.5276	24.53
IPI01011421.2	Dihydrolipoyl dehydrogenase	4.48738e+07	1.01099e+07	0	3.73544e+07	26.2949	6	7	10.7335	3	3				15.7004	5	5	459	48.8503	23.75
IPI01012798.1	Uncharacterized protein	7.63691e+06	0	0	0	5.5844	2	2										106	12.1561	23.58
IPI00909059.5	cDNA FLJ53910, highly similar to Keratin, type II cytoskeletal 6A	7.09941e+07	0	5.60789e+07	5.30424e+07	20.7396	5	7				23.6149	6	8	22.9423	8	8	535	57.8032	22.8
IPI00215888.4	Signal recognition particle 72 kDa protein	5.45557e+07	5.01e+07	2.06497e+07	1.85906e+07	24.1235	8	8	7.81976	3	3	10.0146	4	4	9.54935	4	4	671	74.56	21.01
IPI00215687.1	Isoform 3 of Glutaminase kidney isoform, mitochondrial	6.9628e+07	3.22331e+07	6.34156e+07	4.04143e+07	31.2974	8	9	13.9298	4	4	13.1517	4	4	9.21069	3	3	598	65.4179	20.74
IPI00795257.3	Glyceraldehyde-3-phosphate dehydrogenase	1.56521e+07	1.35559e+07	2.25604e+07	1.72135e+07	5.31769	2	2	5.26844	2	2	9.85834	3	3	5.65088	2	2	293	31.528	20.48
IPI01011344.1	Uncharacterized protein	7.59542e+07	5.00989e+07	7.08324e+07	5.60309e+07	9.64541	3	3	8.18311	3	3	15.2822	5	5	12.1362	3	4	333	37.3826	20.42
IPI00645010.1	Uncharacterized protein	0	2.42823e+07	0	2.12021e+07				10.7715	4	4				10.8481	4	4	248	29.603	20.16
IPI00947227.4	plastin-3 isoform 2	0	0	3.88328e+07	2.63243e+07							31.6982	9	11	16.66	6	6	603	67.5566	19.73
IPI00465170.1	Isoform 1 of 5'-nucleotidase domain-containing protein 3	2.01736e+07	1.13228e+07	4.00955e+07	2.09398e+07	12.8019	5	5	7.95792	3	3	13.7824	5	5	7.98874	3	3	548	63.3791	19.71
IPI00027424.3	Isoform 1 of Glycerol kinase	3.02188e+07	9.85521e+06	4.23739e+07	3.339e+07	11.4104	4	4	6.89657	2	2	19.8463	7	7	18.1228	6	6	524	57.4521	19.08
IPI00022648.2	Eukaryotic translation initiation factor 5	0	2.59887e+07	2.00941e+07	0				15.5374	5	6	11.6505	5	5				431	49.1918	19.03
IPI00004968.1	Pre-mRNA-processing factor 19	8.28739e+07	20924908	5.48881e+07	3.28216e+07	26.8211	7	8	5.06042	2	2	7.99676	3	3	8.19831	3	3	504	55.1463	18.85
IPI00384444.6	Keratin, type I cytoskeletal 14	0	1.03352e+07	0	3.72479e+07				5.64191	2	2				17.5722	6	6	472	51.5294	18.43
IPI00798375.2	cDNA FLJ59357, highly similar to Probable ATP-dependent RNA helicase DDX5	0	2.40812e+07	3.60196e+07	3.50526e+07				11.2764	4	4	18.4873	7	7	14.0962	5	5	544	61.4779	18.38
IPI00514530.5	Uncharacterized protein	4.86444e+07	2.5103e+07	3.02057e+07	2.62811e+07	6.73081	2	2	8.16942	3	3	9.08914	3	3	9.04715	3	3	289	32.2539	18.34
IPI00006713.1	DnaJ homolog subfamily C member 3	1.64808e+07	3.87769e+07	4.28132e+07	2.98372e+07	5.21365	2	2	20.1068	7	7	12.9606	4	5	5.50681	2	2	504	57.5442	18.25
IPI00009662.2	Isoform 1 of 5'-nucleotidase domain-containing protein 2	3.78752e+07	0	3.058e+07	1.35679e+07	16.4982	6	6				9.48032	4	4	6.45166	3	3	520	60.6797	17.69
IPI00026530.4	Protein ERGIC-53	4.99653e+07	9.9643e+07	8.75188e+07	6.17337e+07	15.7344	5	5	16.8045	6	6	14.5195	5	5	10.8768	4	4	510	57.513	17.25
IPI00019888.1	Succinate-semialdehyde dehydrogenase, mitochondrial	2.48329e+07	6.3608e+07	7.08851e+07	4.79896e+07	14.8356	5	5	27.947	6	8	28.4388	7	9	14.2113	4	4	535	57.1783	17.2
IPI00182655.8	Keratin, type II cuticular Hb6	0	0	0	5.43161e+07										24.712	7	8	486	53.4663	16.67
IPI00410017.1	Isoform 2 of Polyadenylate-binding protein 1	0	3.18948e+07	3.91804e+07	2.1191e+07				21.2579	8	8	16.0717	6	6	12.9203	5	5	547	61.142	16.64
IPI00218547.1	Isoform Short of Delta-1-pyrroline-5-carboxylate synthase	2.05512e+07	0	2.36927e+07	4.66427e+07	14.4559	5	5				12.9846	5	5	22.8292	7	7	793	87.0344	16.14
IPI00479186.7	Isoform M2 of Pyruvate kinase isozymes M1/M2	1.42518e+07	0	1.10438e+07	1.28841e+07	8.67819	2	2				4.96358	2	2	11.5345	4	4	531	57.9	16.01
IPI00182728.2	Vacuolar protein sorting-associated protein 4B	2.31536e+07	0	0	1.91367e+07	8.15238	3	3							5.43301	2	2	444	49.2715	15.99
IPI00952607.1	T-complex protein 1 subunit eta isoform d	4.26683e+06	8.7279e+06	2.09752e+07	27419546	7.3705	2	2	4.91996	2	2	5.19743	2	2	10.3769	4	4	499	54.7695	15.43
IPI00217963.3	Keratin, type I cytoskeletal 16	0	1.03352e+07	0	3.72479e+07				5.64191	2	2				14.048	5	5	473	51.2362	15.43
IPI01025856.1	32 kDa protein	0	9.5855e+06	1.68882e+07	9.28722e+06				5.65155	2	2	10.379	4	4	5.42897	2	2	279	32.2913	15.05
IPI00953696.1	glutathione reductase, mitochondrial isoform 4 precursor	0	4.71206e+07	3.24015e+07	3.03053e+07				16.0683	5	6	5.91935	2	2	6.05802	2	2	440	47.2372	14.77
IPI00011126.6	26S protease regulatory subunit 4	1.43318e+07	0	0	0	15.012	5	5										440	49.1537	14.55
IPI01009538.1	Uncharacterized protein	0	1.52767e+07	8.43163e+06	0				7.70397	3	3	7.49534	3	3				401	45.7421	13.72
IPI00895869.1	Isoform 2 of Propionyl-CoA carboxylase alpha chain, mitochondrial	2.78559e+07	0	0	2.50301e+07	15.0175	6	6							15.1907	6	6	702	76.9986	13.39
IPI00965713.3	fibrinogen beta chain isoform 2 preproprotein	1.51354e+07	8.84159e+06	1.67071e+07	3.3058e+07	5.59328	2	2	6.52438	2	2	8.93962	3	3	11.9046	4	4	432	49.9232	12.96
IPI00909914.3	cDNA FLJ50884, highly similar to Beta-hexosaminidase alpha chain	0	5.48443e+06	5.94581e+06	0				8.11512	3	3	5.86807	2	2				301	34.557	12.96
IPI00789806.2	Isoform 2 of Cytosol aminopeptidase	0	1.22963e+07	0	8.61672e+06				10.876	4	4				6.5295	2	2	488	52.7379	12.09
IPI00909956.1	cDNA FLJ59103, highly similar to T-complex protein 1 subunit epsilon	6.59436e+06	0	0	0	7.17723	2	2										283	32.0308	11.66
IPI00007812.1	V-type proton ATPase subunit B, brain isoform	1.75134e+07	1.78972e+07	4.0247e+07	1.85698e+07	6.87946	2	2	6.09772	2	2	12.3286	4	4	8.5692	3	3	511	56.4649	11.55
IPI00020599.1	Calreticulin	0	8.82221e+06	0	0				8.19587	3	3							417	48.1118	11.27
IPI00909681.1	Serine hydroxymethyltransferase	1.90394e+07	1.491e+07	0	0	5.04193	2	2	6.98402	3	3							430	47.8137	10.93
IPI00879638.2	cDNA FLJ58652, highly similar to Probable ATP-dependent RNA helicase DDX17	0	2.40812e+07	1.94897e+07	3.50526e+07				9.10252	3	3	8.27354	3	3	9.36356	3	3	420	47.5272	10.48
IPI01013273.1	cDNA, FLJ79129, highly similar to T-complex protein 1 subunit zeta	0	1.97477e+07	0	0				10.718	4	4							500	54.8328	10.4
IPI00297632.4	Keratin, type I cuticular Ha3-I	0	0	0	2.69224e+07										10.8023	4	4	404	45.9114	10.15
IPI00644079.4	cDNA FLJ44920 fis, clone BRAMY3011501, highly similar to Heterogeneous nuclear ribonucleoprotein U	1.62138e+07	1.76616e+07	0	1.84057e+07	10.588	3	3	13.0581	5	5				11.3286	4	4	750	83.033	10.13
IPI00607693.2	liver carboxylesterase 1 isoform c precursor	0	0	1.60233e+07	2.05479e+07							8.68272	3	3	11.8036	4	4	566	62.3531	10.07
IPI00966946.1	Uncharacterized protein	0	0	3.48443e+06	0							5.23141	2	2				202	23.369	9.9
IPI00032513.3	Keratin, type I cuticular Ha1	0	0	0	2.69224e+07										10.5651	4	4	416	47.2071	9.86
IPI00921588.1	dimethylaniline monooxygenase [N-oxide-forming] 5 isoform 2	2.70973e+07	0	0	1.77728e+07	7.25878	2	2							10.3466	3	3	464	52.443	9.48
IPI00936002.1	Isoform 2 of Alpha-aminoadipic semialdehyde dehydrogenase	0	1.29501e+07	1.55182e+07	0				7.21917	2	2	6.81313	2	2				511	55.3315	9.39
IPI00220637.5	Seryl-tRNA synthetase, cytoplasmic	1.4185e+07	0	0	1.31886e+07	5.735	2	2							5.41936	2	2	514	58.7401	9.34
IPI00984387.1	cDNA FLJ53166, highly similar to Dihydropyrimidinase-related protein 2	1.47909e+07	0	0	0	11.1117	4	4										536	58.1264	8.96
IPI00982539.1	Dha kinase/FMN cyclase splice variant	0	0	2.34841e+07	1.80009e+07							7.98396	2	3	11.6305	3	4	534	54.7879	8.8
IPI00893271.1	Uncharacterized protein	0	5.50599e+06	0	0				6.64953	2	2							444	48.2858	8.78
IPI00910144.2	Uncharacterized protein	2.82081e+07	0	0	1.98225e+07	7.49192	3	3							7.52181	3	3	478	52.4445	8.58
IPI00909703.2	Uncharacterized protein	0	0	1.54542e+07	1.32037e+07							6.84478	3	3	4.25684	2	2	412	45.6993	8.25
IPI00921488.1	Isoform 4 of COP9 signalosome complex subunit 1	1.33224e+07	0	1.19655e+07	0	7.19951	3	3				4.72816	2	2				487	55.0579	7.39
IPI00910664.1	cDNA FLJ52148, highly similar to Apoptosis inhibitor 5	0	0	0	8.85618e+06										4.64282	2	2	331	37.4847	7.25
IPI00299402.1	Pyruvate carboxylase, mitochondrial	3.0384e+07	1.19473e+07	2.06785e+07	3.13301e+07	13.0204	4	4	9.09632	3	3	9.58704	3	3	13.7299	4	5	1178	129.551	7.22
IPI00910614.1	heterogeneous nuclear ribonucleoprotein R isoform 4	0	8.59157e+06	0	5.08547e+06				7.84429	3	3				5.16473	2	2	532	59.6447	6.77
IPI00908458.1	cDNA FLJ58087, highly similar to Alpha-actinin-4	0	0	6.97765e+06	2.46206e+06							4.80798	2	2	5.79459	2	2	562	64.1204	6.76
IPI00797038.1	Isoform 1 of Phosphoenolpyruvate carboxykinase [GTP], mitochondrial	8.18557e+06	0	0	9.62807e+06	6.20634	2	2							6.41559	2	2	640	70.6846	6.56
IPI00414676.6	Heat shock protein HSP 90-beta	0	1.17266e+07	1.62524e+07	1.5486e+07				7.88943	3	3	8.64075	3	3	5.98286	2	2	724	83.2121	6.49
IPI00299033.1	Importin subunit alpha-3	0	0	5.0058e+06	2.60365e+06							7.67401	3	3	5.27835	2	2	521	57.7748	6.14
IPI00465044.2	Protein RCC2	1.49654e+07	0	0	0	5.58363	2	2										522	56.0492	6.13
IPI00010740.1	Isoform Long of Splicing factor, proline- and glutamine-rich	0	1.02138e+07	0	0				8.01885	3	3							707	76.1016	6.08
IPI00985384.1	ATP-dependent RNA helicase DDX3X isoform 3	9.53875e+06	0	0	0	11.0642	3	3										646	71.3109	6.04
IPI00985037.1	cDNA, FLJ79327, highly similar to Methylcrotonoyl-CoA carboxylase subunit alpha, mitochondrial	0	0	0	1.12638e+07										5.76455	2	2	434	48.1854	5.99
IPI00556204.1	Eukaryotic translation elongation factor 1 alpha 2 variant (Fragment)	0	0	1.67438e+07	0							4.88794	2	2				340	36.888	5.59
IPI00930698.1	delta-1-pyrroline-5-carboxylate dehydrogenase, mitochondrial isoform b	0	0	0	2.38635e+07										5.19705	2	2	503	55.0829	5.57
IPI00013894.1	Stress-induced-phosphoprotein 1	0	0	0	6.3567e+06										5.41775	2	2	543	62.5994	5.34
IPI00444262.3	cDNA FLJ45706 fis, clone FEBRA2028457, highly similar to Nucleolin	1.76434e+07	0	0	0	7.0634	3	3										603	65.9225	4.81
IPI01008932.1	cDNA FLJ53870, highly similar to 24-dehydrocholesterol reductase	0	2.2554e+07	0	0				5.51258	2	2							475	54.7145	4.63
IPI00297492.2	Dolichyl-diphosphooligosaccharide--protein glycosyltransferase subunit STT3A	0	0	2.6525e+07	0							7.21218	3	3				705	80.4768	4.54
IPI00794673.2	cDNA FLJ59382, highly similar to T-complex protein 1 subunit theta	0	0	0	7.50524e+06										5.33185	2	2	475	51.5533	4.21
IPI00241238.3	retinal dehydrogenase 2 isoform 3	0	0	6.36073e+07	0							4.82998	2	2				422	46.1075	3.79
IPI01012526.1	Uncharacterized protein	0	6.16056e+06	0	0				7.19511	2	2							847	96.1558	3.78
IPI00336016.3	Probable cysteinyl-tRNA synthetase, mitochondrial	0	9.09102e+06	0	0				4.91536	2	2							564	62.1847	3.72
IPI01010856.2	Uncharacterized protein	0	1.23046e+07	0	0				4.64715	2	2							583	64.6426	3.6
IPI00027230.3	Endoplasmin	0	0	1.40948e+07	1.46865e+07							5.43486	2	2	6.26037	2	2	803	92.4113	3.24
IPI00478003.3	Alpha-2-macroglobulin	0	0	0	8.68438e+06										10.3049	3	3	1474	163.188	2.78
IPI00013452.11	Bifunctional aminoacyl-tRNA synthetase	1.57619e+07	0	1.61143e+07	0	4.84243	2	2				7.05156	3	3				1512	170.483	2.31
IPI00553169.6	Uncharacterized protein	3.76974e+06	0	0	0	5.18823	2	2										2315	245.713	1.3

## Sheet: ACV2 -> CES1
		Area				Control day 1			Control day 5			ACV2 day 1			ACV2 day 5			General information
Accession	Description	Control day 1	Control day 5	ACV2 day 1	ACV2 day 5	Score A2	# Peptides A2	# PSM A2	Score B2	# Peptides B2	# PSM B2	Score C2	# Peptides C2	# PSM C2	Score D2	# Peptides D2	# PSM D2	# AAs	MW [kDa]	ΣCoverage
IPI00784154.1	60 kDa heat shock protein, mitochondrial	3.38032e+09	1.03248e+09	2.41746e+09	2.15934e+09	408.134	36	124	325.573	28	103	288.299	28	98	317.583	22	94	573	61.0164	74.87
IPI00479186.7	Isoform M2 of Pyruvate kinase isozymes M1/M2	6.43355e+08	3.67047e+08	7.35285e+08	5.94916e+08	102.606	20	29	156.651	21	49	109.865	20	33	129.526	16	38	531	57.9	56.12
IPI00010720.1	T-complex protein 1 subunit epsilon	2.35045e+08	8.67519e+07	2.53344e+08	2.24024e+08	62.7414	15	19	51.893	16	18	55.1138	17	19	50.5604	13	17	541	59.6328	54.34
IPI00302925.4	59 kDa protein	1.77422e+08	1.02657e+08	1.93479e+08	1.83307e+08	36.457	12	12	79.5854	19	26	88.1236	21	30	75.2567	17	25	547	59.4404	51.19
IPI00607693.2	liver carboxylesterase 1 isoform c precursor	1.04257e+08	4.2975e+07	1.13054e+09	1.51256e+09	39.704	12	12	32.2984	10	10	157.418	20	49	249.239	25	80	566	62.3531	51.06
IPI00220327.4	Keratin, type II cytoskeletal 1	5.40882e+08	2.05764e+08	4.96728e+08	5.05361e+08	139.82	25	42	85.4286	13	27	104.099	20	35	102.061	16	30	644	65.999	50.31
IPI00019359.4	Keratin, type I cytoskeletal 9	1.65681e+08	4.25073e+07	1.21154e+08	2.12378e+08	32.43	9	9	27.1398	7	8	32.1056	9	11	49.124	11	14	623	62.0268	47.83
IPI00007074.5	Tyrosyl-tRNA synthetase, cytoplasmic	8.19006e+07	4.58509e+07	1.3465e+08	8.06812e+07	29.4648	10	10	43.0729	16	17	48.3051	17	18	35.0481	13	13	528	59.1061	44.13
IPI00551024.5	Bifunctional ATP-dependent dihydroxyacetone kinase/FAD-AMP lyase (cyclizing)	2.7849e+08	9.64258e+06	2.86334e+08	9.51398e+07	92.3812	14	26	21.2809	6	8	76.4203	10	24	38.7883	7	12	575	58.91	44
IPI00021304.1	Keratin, type II cytoskeletal 2 epidermal	4.64409e+08	1.71943e+08	3.64731e+08	4.11243e+08	72.937	19	24	66.8651	15	21	65.685	16	21	66.5728	16	21	645	65.8254	42.17
IPI00010796.1	Protein disulfide-isomerase	1.0488e+08	4.25098e+07	1.118e+08	1.44572e+08	33.5754	10	11	46.5598	13	16	43.0577	13	14	61.2342	15	21	508	57.0807	39.17
IPI00217871.4	Delta-1-pyrroline-5-carboxylate dehydrogenase, mitochondrial	4.3058e+08	1.96588e+08	5.68949e+08	6.58009e+08	53.5221	12	18	55.2429	8	19	56.2007	14	20	79.6626	10	27	563	61.6806	38.19
IPI00009865.4	Keratin, type I cytoskeletal 10	2.7262e+08	1.42581e+08	1.72347e+08	2.09781e+08	58.7081	17	19	51.1446	13	18	42.5175	13	15	53.094	13	17	584	58.7917	38.01
IPI00984387.1	cDNA FLJ53166, highly similar to Dihydropyrimidinase-related protein 2	9.17648e+07	3.19177e+07	1.09035e+08	9.80515e+07	22.1309	7	7	24.0311	6	7	23.6806	8	8	36.8714	10	12	536	58.1264	35.82
IPI00009923.1	Isoform 1 of Prolyl 4-hydroxylase subunit alpha-1	1.12525e+08	2.24601e+07	8.98404e+07	3.87596e+07	43.2304	11	13	23.9556	7	8	35.912	11	12	22.4146	7	8	534	61.011	35.21
IPI01014074.1	cDNA FLJ53296, highly similar to Serine/threonine-protein phosphatase 2A 65 kDa regulatory subunit A alpha isoform	1.11168e+08	0	5.30689e+07	0	37.063	11	12				22.8554	9	9				579	64.1403	34.54
IPI01011344.1	Uncharacterized protein	2.05005e+08	3.73992e+07	1.50615e+08	9.0508e+07	18.3266	5	6	10.6404	4	4	16.2831	6	6	12.3628	3	4	333	37.3826	33.33
IPI00020599.1	Calreticulin	1.33194e+08	1.08545e+07	5.21833e+07	3.53263e+07	23.6819	6	8	5.85257	2	2	9.06375	3	3	11.9215	4	4	417	48.1118	31.65
IPI00925572.1	asparagine synthetase [glutamine-hydrolyzing] isoform b	9.84722e+07	3.01165e+07	2.10866e+08	7.16937e+07	19.2716	7	8	17.9453	6	7	42.5445	10	15	32.1024	8	10	540	62.1287	31.48
IPI00977430.1	cDNA, FLJ79286, highly similar to T-complex protein 1 subunit gamma	1.83916e+08	0	7.26266e+07	1.76377e+07	43.9775	12	15				25.0797	8	10	8.42459	3	3	500	55.6387	30.8
IPI00465436.4	Catalase	1.02053e+08	4.92034e+07	7.95343e+07	6.80848e+07	33.7654	12	12	39.1892	13	13	34.771	12	12	44.8707	14	15	527	59.7188	30.74
IPI00943173.1	Coronin-1C	6.4376e+07	2.79459e+07	4.82255e+07	5.9291e+07	19.2457	7	7	28.0042	7	10	16.5972	7	7	21.4955	6	8	474	53.2151	30.59
IPI00031479.1	Protein disulfide-isomerase A5	6.89297e+07	3.02121e+07	6.09356e+07	4.30167e+07	25.3847	9	9	24.3133	9	9	22.342	7	8	9.94874	4	4	519	59.5561	28.9
IPI00793930.1	TUBA1B protein	5.60787e+07	6.85334e+06	4.4858e+07	3.56073e+07	15.2823	5	5	6.34688	2	2	10.0339	3	3	14.6574	3	4	335	37.1941	28.66
IPI00909059.5	cDNA FLJ53910, highly similar to Keratin, type II cytoskeletal 6A	2.19119e+08	0	3.69534e+07	4.79075e+07	23.8083	7	9				13.8665	4	5	33.4315	9	11	535	57.8032	28.41
IPI00645452.1	Uncharacterized protein	1.23585e+07	0	1.57746e+07	1.82363e+07	10.6384	3	3				12.1867	4	4	7.97792	3	3	426	47.736	28.17
IPI00182655.8	Keratin, type II cuticular Hb6	0	0	0	2.67869e+08										53.8082	12	18	486	53.4663	27.37
IPI00297795.4	Keratin, type II cuticular Hb3	0	0	0	2.67869e+08										46.17	12	16	493	54.1605	26.77
IPI00032541.1	Keratin, type II cuticular Hb5	0	0	0	2.67869e+08										42.0144	11	15	507	55.7665	25.25
IPI01013273.1	cDNA, FLJ79129, highly similar to T-complex protein 1 subunit zeta	3.81583e+07	0	3.6135e+07	2.23605e+07	17.901	6	6				16.6608	5	6	7.17143	2	3	500	54.8328	24.2
IPI00895869.1	Isoform 2 of Propionyl-CoA carboxylase alpha chain, mitochondrial	6.04723e+07	1.65056e+07	3.98362e+07	5.25635e+07	16.6359	6	6	20.027	7	8	17.8915	7	7	24.4653	9	9	702	76.9986	23.36
IPI00332828.1	cocaine esterase isoform 1	8.95387e+07	2.47585e+07	1.06054e+08	1.03277e+08	21.0297	7	7	18.0064	5	6	29.2734	7	10	27.9081	7	10	623	68.8548	22.95
IPI00910738.1	cDNA FLJ60647, highly similar to Keratin, type II cytoskeletal 6B	1.0784e+08	0	3.26673e+07	4.50252e+07	16.0186	5	6				11.2849	3	4	24.5988	7	8	526	55.6981	22.81
IPI00027834.3	Heterogeneous nuclear ribonucleoprotein L	1.00735e+08	2.43668e+07	5.4706e+07	2.24366e+07	19.7808	6	6	15.2058	5	5	10.3767	3	3	6.28211	2	2	589	64.0924	22.58
IPI00514530.5	Uncharacterized protein	1.1443e+08	7.95595e+06	8.25053e+07	4.46673e+07	11.8764	4	4	5.48171	2	2	13.0928	5	5	6.26086	2	2	289	32.2539	22.49
IPI01014869.1	cDNA FLJ54148, highly similar to 26S proteasome non-ATPase regulatory subunit 3	2.0534e+07	0	2.63832e+07	1.14735e+07	13.3952	3	4				9.04672	3	3	4.55876	2	2	356	41.1577	22.47
IPI00384444.6	Keratin, type I cytoskeletal 14	0	0	0	5.86493e+07										23.4218	7	7	472	51.5294	22.03
IPI00182373.2	Isoform IIa of Prolyl 4-hydroxylase subunit alpha-2	2.72104e+07	1.43307e+07	34654170	0	17.7144	7	7	14.2474	5	5	10.355	4	4				533	60.5946	21.58
IPI00218343.4	Tubulin alpha-1C chain	5.60787e+07	6.85334e+06	4.4858e+07	3.56073e+07	15.579	5	5	6.34688	2	2	10.0339	3	3	14.6574	3	4	449	49.8635	21.38
IPI00797038.1	Isoform 1 of Phosphoenolpyruvate carboxykinase [GTP], mitochondrial	6.4105e+07	4.51156e+06	1.82777e+07	1.88059e+07	25.0597	8	8	8.96858	3	3	6.14247	2	2	9.17115	3	3	640	70.6846	21.09
IPI00945862.1	Uncharacterized protein	2.11811e+07	0	0	1.67724e+07	15.4322	5	5							13.1276	4	4	423	45.3922	20.57
IPI00927191.2	Isoform 3 of Beta-galactosidase	7.02634e+07	1.29679e+07	5.77128e+07	7.24452e+07	24.1742	7	8	14.5749	4	5	21.8789	6	7	24.3079	6	8	647	72.7045	20.4
IPI00640357.1	ubiquitin carboxyl-terminal hydrolase 14 isoform b	4.01749e+07	1.68448e+07	3.84246e+07	4.15012e+07	6.58891	2	2	8.95241	3	3	9.65236	3	3	16.6248	5	5	459	52.3523	19.83
IPI00792499.1	Uncharacterized protein	4.70004e+07	1.6761e+07	1.77964e+07	5.62926e+07	17.2177	6	6	16.5429	6	6	8.02307	3	3	21.7132	7	7	616	68.2886	19.64
IPI00299402.1	Pyruvate carboxylase, mitochondrial	6.69033e+07	2.48303e+07	4.85206e+07	6.78401e+07	33.5542	9	10	33.4949	10	11	30.9947	7	9	35.3544	9	10	1178	129.551	19.02
IPI00024642.2	Isoform 1 of Coiled-coil domain-containing protein 47	2.59806e+07	8.80467e+06	2.23331e+07	0	5.9171	2	2	8.24381	3	3	9.06687	3	3				483	55.8383	18.84
IPI00966724.1	Uncharacterized protein	3.16241e+07	0	2.59988e+07	0	6.52752	3	3				8.62533	3	3				245	26.7806	18.78
IPI00099311.3	Isoform 1 of tRNA (adenine-N(1)-)-methyltransferase non-catalytic subunit TRM6	7.6513e+06	5.97273e+06	1.58988e+07	3.61201e+06	6.3433	2	2	10.3078	3	4	5.8338	2	2	6.26885	2	2	497	55.7643	18.71
IPI01015394.1	cDNA FLJ50666, weakly similar to Long-chain-fatty-acid--CoA ligase	6.37939e+07	0	2.77726e+07	9.18569e+06	24.1166	7	8				11.753	4	4	5.42905	2	2	572	63.6114	18.71
IPI00796776.2	cDNA FLJ54081, highly similar to Keratin, type II cytoskeletal 5	1.78333e+08	0	1.61779e+07	3.78517e+07	23.9693	7	9				14.38	4	5	14.2572	4	5	555	58.8143	17.84
IPI00290566.1	T-complex protein 1 subunit alpha	3.10878e+07	0	3.96954e+07	0	19.5091	6	7				21.0664	8	8				556	60.3056	17.45
IPI00956601.1	UDP-glucose 6-dehydrogenase isoform 2	1.3608e+07	1.14051e+07	3.66183e+07	1.65921e+07	5.04965	2	2	8.33034	3	3	17.7194	6	6	9.75132	4	4	427	47.5723	17.33
IPI00982649.1	Uncharacterized protein	0	0	1.21931e+07	0							6.79708	2	2				169	19.3767	17.16
IPI00983581.1	SYNCRIP protein (Fragment)	2.96439e+07	4.99424e+06	2.3497e+07	0	10.0588	4	4	7.90935	3	3	6.96734	3	3				453	50.6189	16.78
IPI00329625.5	cDNA FLJ56153, highly similar to Homo sapiens transforming growth factor beta regulator 4 (TBRG4), transcript variant 1, mRNA	4.63766e+07	9.69541e+06	4.1354e+07	2.05205e+07	18.3947	4	5	7.86291	2	3	10.6361	3	3	8.02709	3	3	642	71.8119	16.51
IPI00217963.3	Keratin, type I cytoskeletal 16	0	0	0	5.1488e+07										21.3034	5	6	473	51.2362	16.49
IPI00645010.1	Uncharacterized protein	0	0	6.71839e+06	1.10159e+07							5.02322	2	2	5.73637	2	2	248	29.603	16.13
IPI00165261.6	Sec1 family domain-containing protein 1	3.59041e+07	5.38302e+06	2.85069e+07	3.05e+07	19.9249	5	6	13.7768	4	5	16.734	4	5	21.2859	5	6	642	72.3341	16.04
IPI01015801.1	cDNA FLJ16138 fis, clone BRALZ2017531, highly similar to Glutamate dehydrogenase 1, mitochondrial	3.71891e+07	5.16229e+06	1.8329e+07	0	5.49097	2	2	8.2209	3	3	8.13963	3	3				391	42.9227	14.83
IPI00759723.1	Isoform Monomeric of Arginyl-tRNA synthetase, cytoplasmic	1.86644e+07	0	1.83651e+07	0	8.25167	3	3				14.8301	5	5				588	67.0975	14.29
IPI00924492.1	Uncharacterized protein	2.32079e+07	0	2.68101e+07	0	7.62459	3	3				16.2662	6	6				484	55.5359	13.64
IPI00985384.1	ATP-dependent RNA helicase DDX3X isoform 3	4.44089e+07	0	2.25818e+07	0	19.2079	6	6				11.9749	4	4				646	71.3109	13.62
IPI00383680.3	dolichyl-diphosphooligosaccharide--protein glycosyltransferase subunit 2 isoform 2 precursor	5.23017e+07	0	5.96359e+07	0	20.7117	5	6				14.9143	2	4				615	67.6814	13.5
IPI00911041.1	cDNA FLJ51339, highly similar to Methionyl-tRNA synthetase, mitochondrial	1.11303e+07	0	1.82774e+07	1.84436e+07	11.5991	3	4				10.8559	4	4	11.2103	4	4	520	58.4418	12.12
IPI00032513.3	Keratin, type I cuticular Ha1	0	0	0	3.09452e+07										12.4355	5	5	416	47.2071	12.02
IPI00923547.1	60 kDa chaperonin (Fragment)	9.21458e+08	0	0	0	8.93586	2	4										185	19.7657	11.35
IPI00972999.1	Histone deacetylase	0	1.57877e+07	2.88084e+07	3.08261e+07				6.75942	2	2	9.22797	3	3	7.55268	2	2	458	51.9653	11.35
IPI00940393.3	Uncharacterized protein	2.06905e+07	0	2.76039e+07	0	6.03485	2	2				4.91237	2	2				441	47.8389	10.66
IPI01012004.1	cDNA PSEC0175 fis, clone OVARC1000169, highly similar to Protein disulfide-isomerase A3	0	0	0	2.06247e+07										9.51849	4	4	480	54.0685	10.42
IPI00024403.1	Copine-3	0	3.18165e+06	2.85392e+07	2.54287e+07				5.10136	2	2	9.93401	4	4	16.0129	5	6	537	60.0921	10.24
IPI00909449.2	GH3 domain-containing protein isoform 2	8.62113e+06	0	4.66485e+06	2.76874e+06	5.78339	2	2				8.08265	3	3	8.57208	2	2	491	53.4853	10.18
IPI01011335.1	cDNA FLJ60435, highly similar to Heterogeneous nuclear ribonucleoprotein M	0	2.75641e+06	1.21692e+07	0				5.45323	2	2	8.32047	3	3				366	39.1609	9.84
IPI00651677.1	Isoform 2 of Probable ATP-dependent RNA helicase DDX17	0	5.79408e+06	3.03752e+07	1.93321e+07				8.71119	3	3	15.3563	5	5	6.0673	2	2	652	72.4961	9.82
IPI00514204.3	Uncharacterized protein	3.26275e+07	0	0	0	10.4633	4	4										465	53.2186	9.68
IPI00019988.1	N-sulphoglucosamine sulphohydrolase	9.99924e+07	0	7.1059e+07	0	4.40521	2	2				7.69047	3	3				502	56.6595	9.56
IPI00010080.2	Serine/threonine-protein kinase OSR1	0	0	0	9.9859e+06										11.1214	3	3	527	57.9861	9.11
IPI00789225.3	Isoform 3 of NudC domain-containing protein 1	3.49919e+07	0	3.31557e+07	0	5.01662	2	2				10.4368	4	4				496	56.5783	9.07
IPI00978981.1	Uncharacterized protein	0	0	5.59891e+06	0							7.90542	3	3				479	53.0337	8.98
IPI00644079.4	cDNA FLJ44920 fis, clone BRAMY3011501, highly similar to Heterogeneous nuclear ribonucleoprotein U	3.1408e+07	6.84326e+06	0	0	7.86784	2	2	7.28128	3	3							750	83.033	8.8
IPI00444262.3	cDNA FLJ45706 fis, clone FEBRA2028457, highly similar to Nucleolin	2.89904e+07	1.01738e+07	2.67181e+07	1.69206e+07	9.94208	4	4	5.39046	2	2	7.10321	3	3	6.70505	3	3	603	65.9225	8.79
IPI00967193.2	Uncharacterized protein	0	1.11532e+06	0	0				5.0491	2	2							286	31.5582	8.74
IPI00184821.1	Isoform 1 of Bifunctional coenzyme A synthase	2.0253e+07	0	1.49229e+07	4.40423e+06	12.846	3	4				11.6914	4	4	6.76933	2	2	564	62.29	8.69
IPI00412880.2	Isoform 1 of Histone-arginine methyltransferase CARM1	3.03761e+07	0	2.38843e+07	0	8.11197	3	3				4.8983	2	2				585	63.4192	8.55
IPI00219526.6	Isoform 1 of Phosphoglucomutase-1	2.30555e+07	0	9.8386e+06	0	8.34303	3	3				5.18376	2	2				562	61.4105	8.54
IPI00984945.1	EF-Hand type domain containing protein	0	0	3.26779e+06	0							6.98277	2	2				317	36.1701	8.52
IPI00029054.1	Cytosolic purine 5'-nucleotidase	1.93919e+07	0	2.82805e+07	0	5.56481	2	2				7.65447	3	3				561	64.9283	8.38
IPI00218547.1	Isoform Short of Delta-1-pyrroline-5-carboxylate synthase	2.64073e+07	7.59672e+06	1.23004e+07	2.5218e+07	11.777	3	4	4.55191	2	2	7.49033	3	3	5.08004	2	2	793	87.0344	8.32
IPI00915274.1	H/ACA ribonucleoprotein complex subunit 4 isoform 2	8.17592e+06	0	1.59192e+07	0	5.46124	2	2				10.7728	4	4				509	56.9965	8.25
IPI00783097.4	Glycyl-tRNA synthetase	1.7219e+07	8.39763e+06	3.00932e+07	0	8.44626	3	3	6.02038	2	2	5.8417	2	2				739	83.1126	8.12
IPI00028277.8	Isoform 1 of Alpha-ketoglutarate-dependent dioxygenase FTO	0	8.06464e+06	0	1.25666e+07				5.03765	2	2				6.18512	2	2	505	58.2449	8.12
IPI00925601.1	Uncharacterized protein	0	3.09052e+06	0	0				8.66638	4	4							591	64.4833	7.95
IPI00784936.1	septin-9 isoform c	4.51738e+07	1.62645e+07	3.24506e+07	2.68681e+07	5.89862	2	2	8.52985	3	3	5.79163	2	2	11.2668	3	4	568	63.6259	7.92
IPI00027230.3	Endoplasmin	4.83873e+07	1.32375e+07	5.0439e+07	2.88372e+07	13.1773	5	5	6.20738	2	2	10.698	4	4	6.32424	2	2	803	92.4113	7.85
IPI00297492.2	Dolichyl-diphosphooligosaccharide--protein glycosyltransferase subunit STT3A	3.5724e+07	0	3.01157e+07	2.22132e+07	4.54812	2	2				7.46758	3	3	4.78872	2	2	705	80.4768	7.8
IPI00795694.1	Isoform 2 of Acyl-CoA synthetase short-chain family member 3, mitochondrial	8.37167e+06	0	0	0	5.86524	2	2										368	40.3006	7.61
IPI01026021.1	Protein	1.87467e+08	0	1.9041e+08	0	4.32782	2	2				4.65983	2	2				264	28.7992	7.58
IPI00966657.1	Uncharacterized protein	6.84698e+06	0	0	0	4.8519	2	2										433	48.1297	7.39
IPI00940673.2	cDNA FLJ36348 fis, clone THYMU2007025, highly similar to TRANSKETOLASE	0	0	2.01418e+07	0							6.31177	2	2				540	58.9443	6.85
IPI01015738.1	Uncharacterized protein	1.97753e+07	0	0	2.94724e+06	5.53574	2	2							6.97042	3	3	692	79.8635	6.79
IPI00604652.1	NEDD8-activating enzyme E1 regulatory subunit isoform c	0	9.16031e+06	3.39383e+07	3.01995e+07				6.01106	2	2	5.74191	2	2	5.88722	2	2	445	50.5926	6.74
IPI00908449.1	cDNA FLJ58737, highly similar to Splicing factor 3A subunit 3	0	5.76799e+06	2.05569e+07	0				5.33036	2	2	8.17153	3	3				448	52.3951	6.7
IPI00549566.4	Probable arginyl-tRNA synthetase, mitochondrial	8.67829e+06	0	0	0	8.75567	3	3										578	65.464	6.57
IPI00414676.6	Heat shock protein HSP 90-beta	2.57053e+07	7.68797e+06	2.53151e+07	1.84077e+07	5.27069	2	2	9.1729	3	3	8.75666	3	3	5.60043	2	2	724	83.2121	6.49
IPI00335161.4	Isoform 2 of All-trans-retinol 13,14-reductase	8.16124e+06	0	0	0	5.60261	2	2										481	52.4052	6.24
IPI00910614.1	heterogeneous nuclear ribonucleoprotein R isoform 4	4.0808e+07	2.42039e+06	1.97533e+07	0	4.4509	2	2	5.04258	2	2	7.15805	3	3				532	59.6447	6.2
IPI01015917.1	T-complex protein 1 subunit delta	6.02352e+07	0	0	0	7.23875	2	2										389	42.2726	5.91
IPI00784156.1	Isoform 1 of AP-2 complex subunit beta	1.2823e+07	0	1.67869e+07	0	10.9039	3	4				6.18402	3	3				937	104.486	5.87
IPI01013172.1	cDNA FLJ58642, highly similar to Homo sapiens elongation protein 3 homolog (ELP3), mRNA	0	0	3.42427e+06	0							4.3912	2	2				418	48.0316	5.5
IPI00922068.1	Isoform 5 of Insulin-like growth factor 2 mRNA-binding protein 2	0	0	9.36644e+06	0							5.69885	2	2				493	54.6884	5.48
IPI00843881.1	Isoform 2 of Transmembrane protein 214	0	0	8.99642e+06	0							7.2425	3	3				644	71.9938	5.28
IPI00329444.5	Acyl-coenzyme A synthetase ACSM2B, mitochondrial	2.26576e+07	0	0	0	7.0601	2	2										577	64.2299	5.2
IPI00478003.3	Alpha-2-macroglobulin	0	0	0	1.53253e+07										16.7183	5	5	1474	163.188	5.09
IPI00642416.1	60 kDa SS-A/Ro ribonucleoprotein isoform 4	0	0	0	8.07284e+06										5.99166	2	2	518	58.4452	4.63
IPI00003362.3	78 kDa glucose-regulated protein	0	5.46567e+06	0	0				6.20224	2	2							654	72.2884	4.43
IPI00909399.2	xaa-Pro dipeptidase isoform 3	0	4.98566e+06	0	0				5.67192	2	2							429	47.2304	4.43
IPI00922694.2	Uncharacterized protein	1.81461e+07	0	0	0	8.25727	2	3										632	69.8831	4.27
IPI00916474.2	mannosyl-oligosaccharide glucosidase isoform 2	0	0	1.34915e+06	0							5.02698	2	2				731	80.6526	4.1
IPI00026781.3	Fatty acid synthase	1.24367e+07	7.3034e+06	2.00651e+07	1.39437e+07	6.98332	2	2	8.62305	3	3	12.7567	5	5	4.67215	2	2	2511	273.254	3.94
IPI01012526.1	Uncharacterized protein	0	4.2389e+06	0	0				6.79611	2	2							847	96.1558	3.78
IPI00479951.4	Isoform 2 of FAST kinase domain-containing protein 2	0	0	2.65002e+06	3.10221e+06							5.23123	2	2	4.83328	2	2	648	74.4875	3.7
IPI00879002.1	Uncharacterized protein	0	0	9.63371e+06	0							4.94654	2	2				636	73.5006	3.46
IPI00783982.1	Coatomer subunit gamma	4.62348e+06	0	0	0	6.72304	2	2										874	97.6555	3.32
IPI00980468.2	cDNA FLJ61220, highly similar to Amine oxidase (flavin-containing) A	1.51359e+07	0	1.07569e+07	0	6.19868	2	2				8.98631	2	3				394	44.8188	3.05
IPI00442135.2	Uncharacterized protein	5.58982e+06	0	0	0	6.20249	2	2										847	94.8057	2.72
IPI01026216.1	69 kDa protein	1.33368e+07	0	0	0	4.54385	2	2										634	69.4417	2.68
IPI00013452.11	Bifunctional aminoacyl-tRNA synthetase	1.20702e+07	0	1.196e+07	0	8.72161	3	3				9.10863	3	3				1512	170.483	2.25
